# Supplementary material
Source: PubMed Central journal article supplement (PMC3969096)

# **Cationic Cyclizations and Rearrangements Promoted by a Heterogeneous Gold Catalyst**

Tulaza Vaidya, Ryan Cheng, Peter N. Carlsen, Alison J. Frontier,\* and Richard Eisenberg\*

Department of Chemistry, University of Rochester, Rochester, NY 14627-0216, United States

## **Supporting Information**

### **NMR spectra**

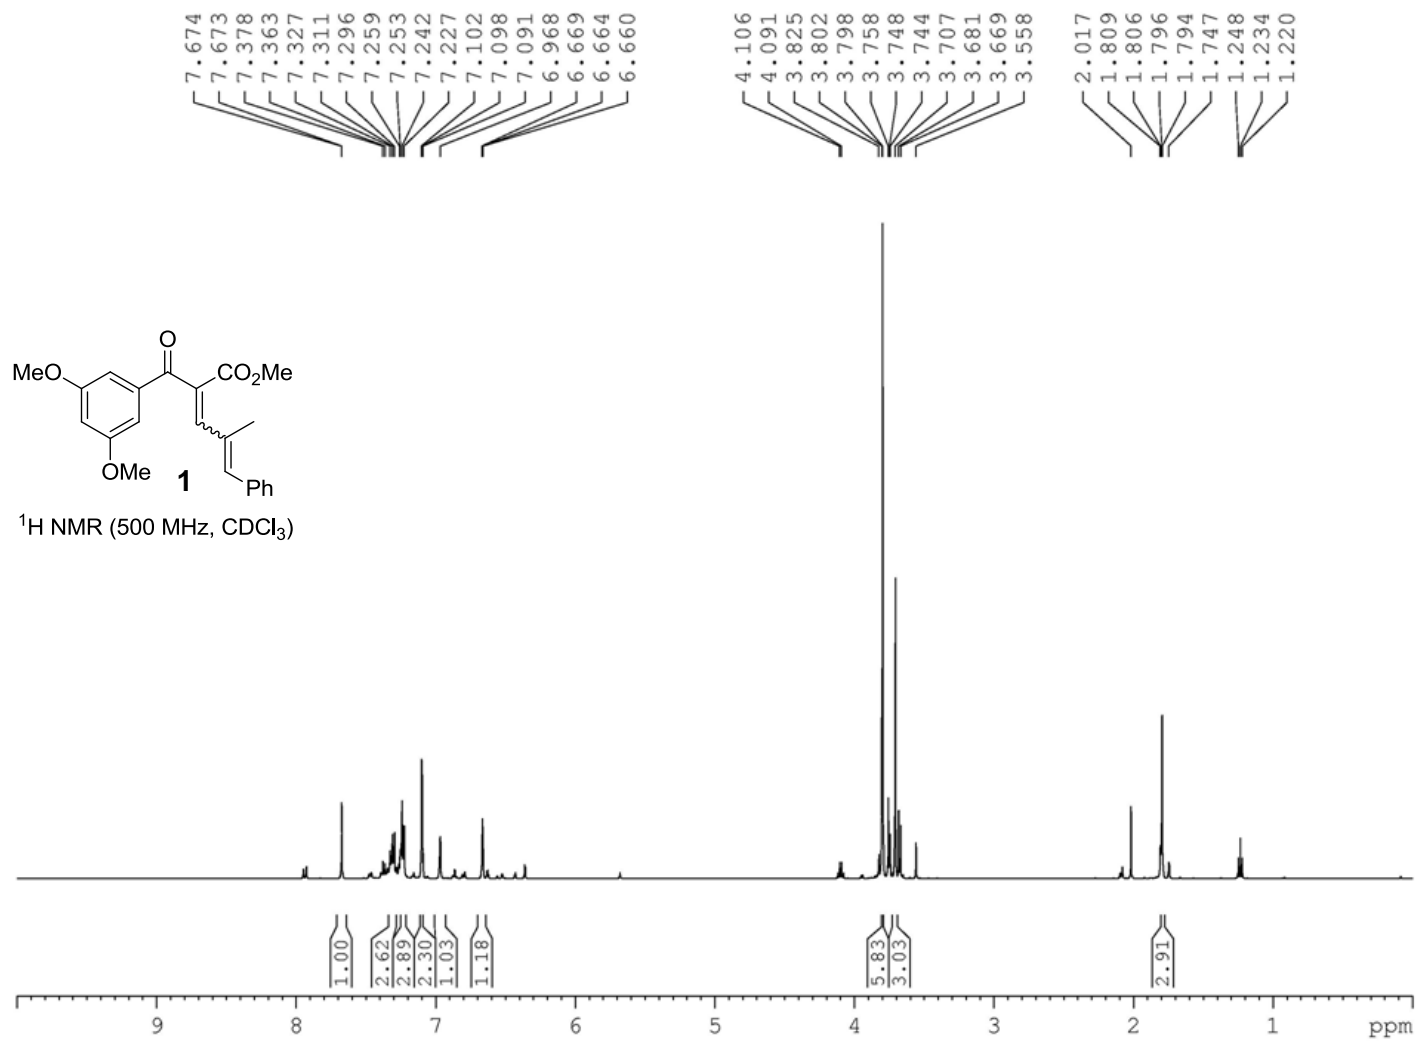

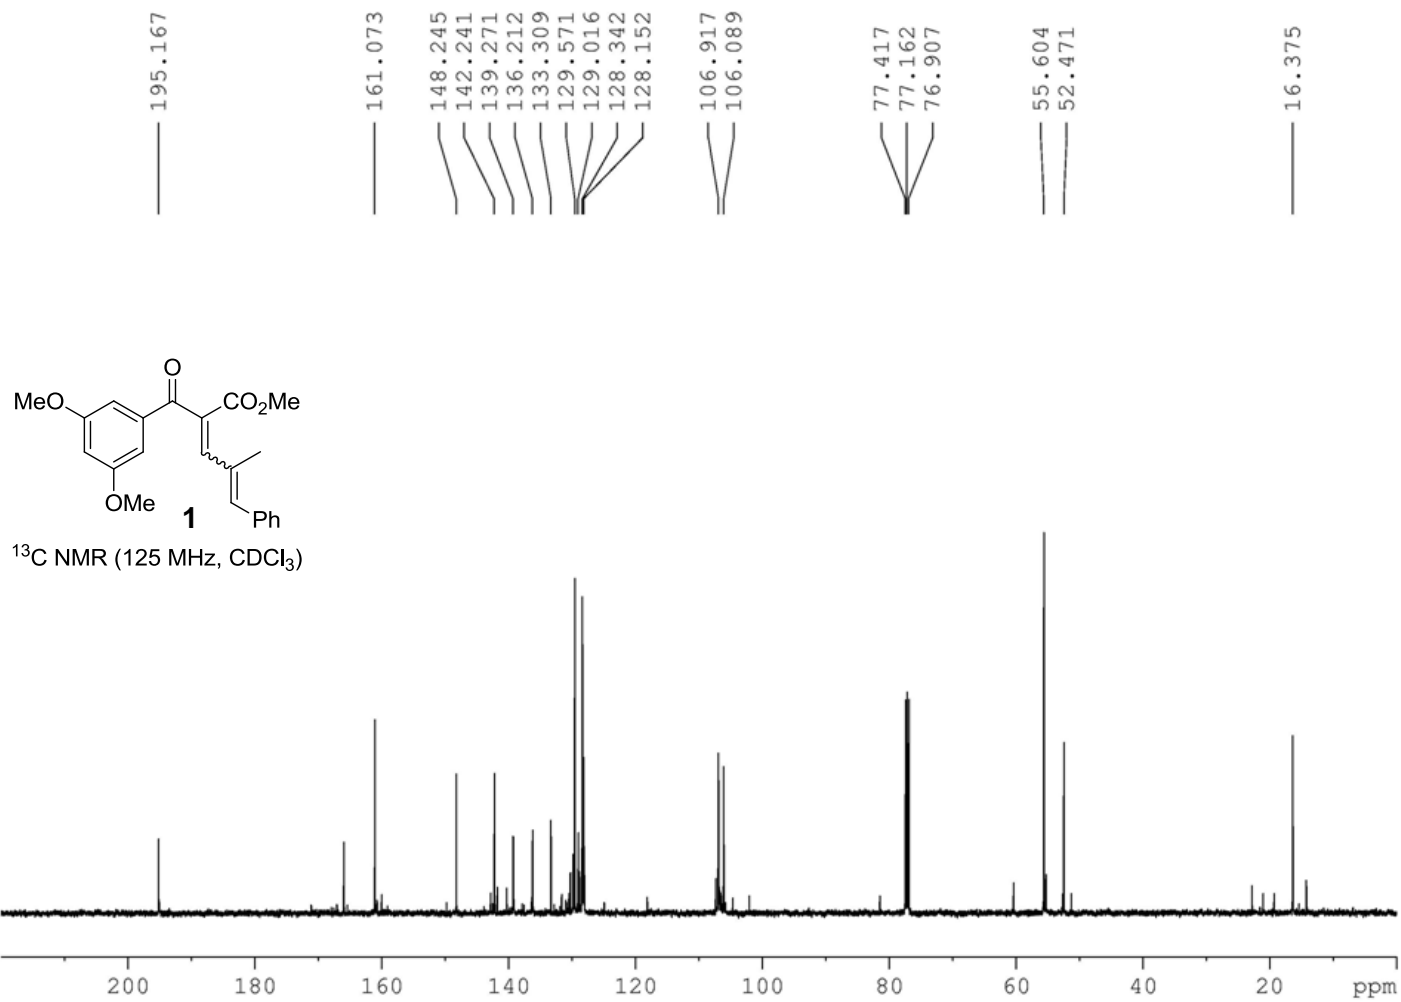

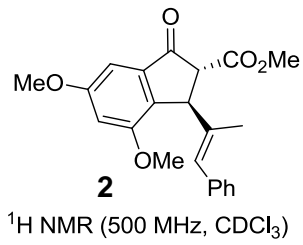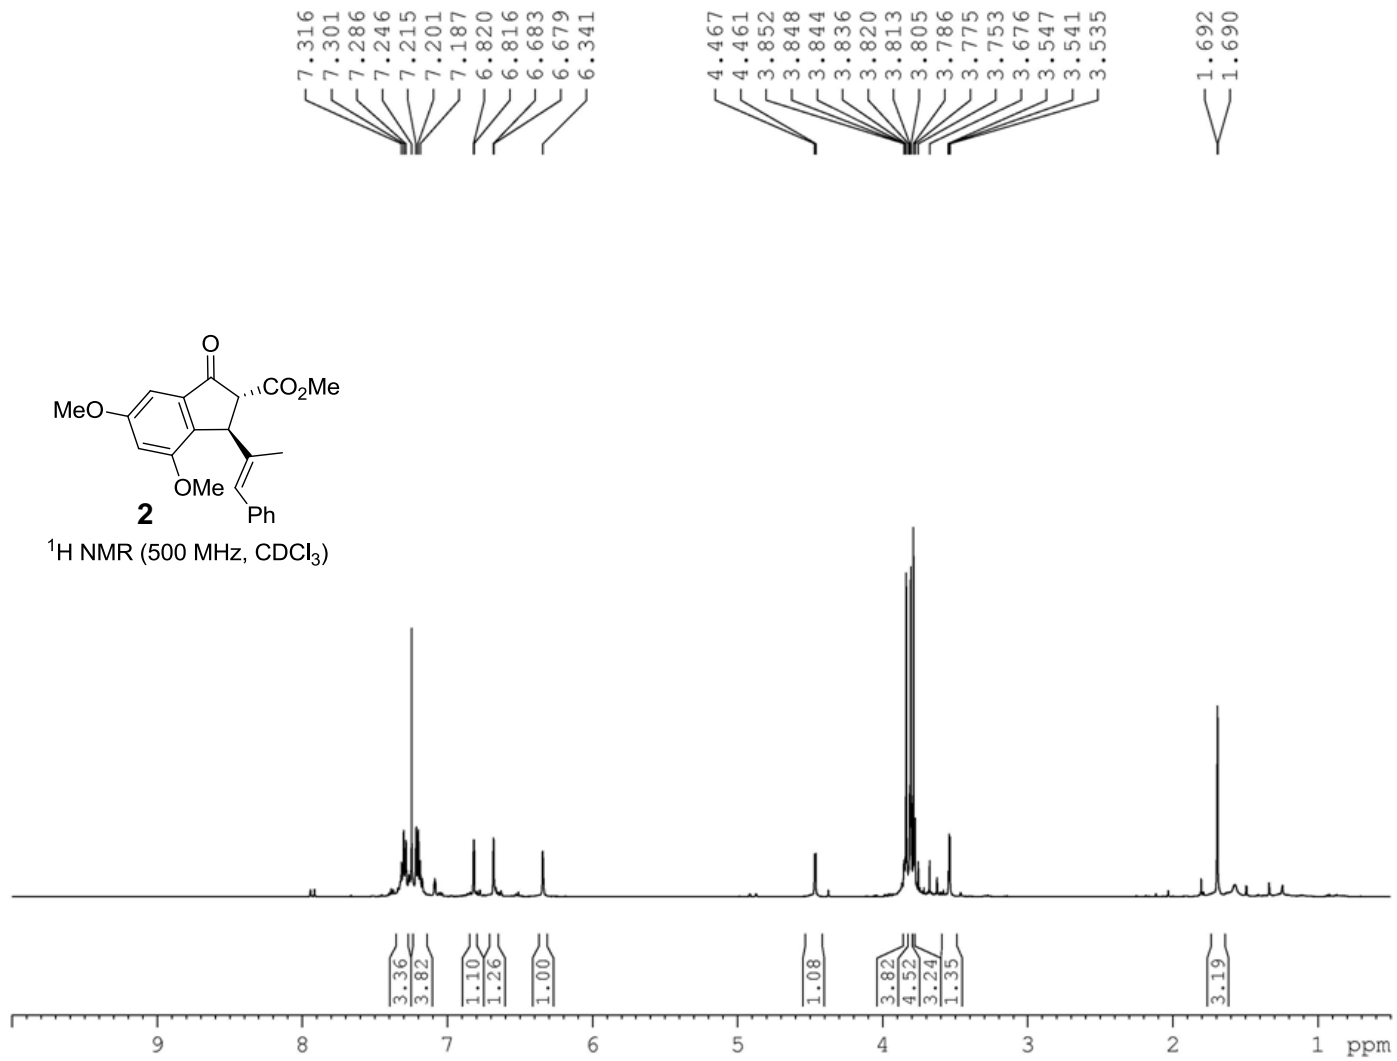

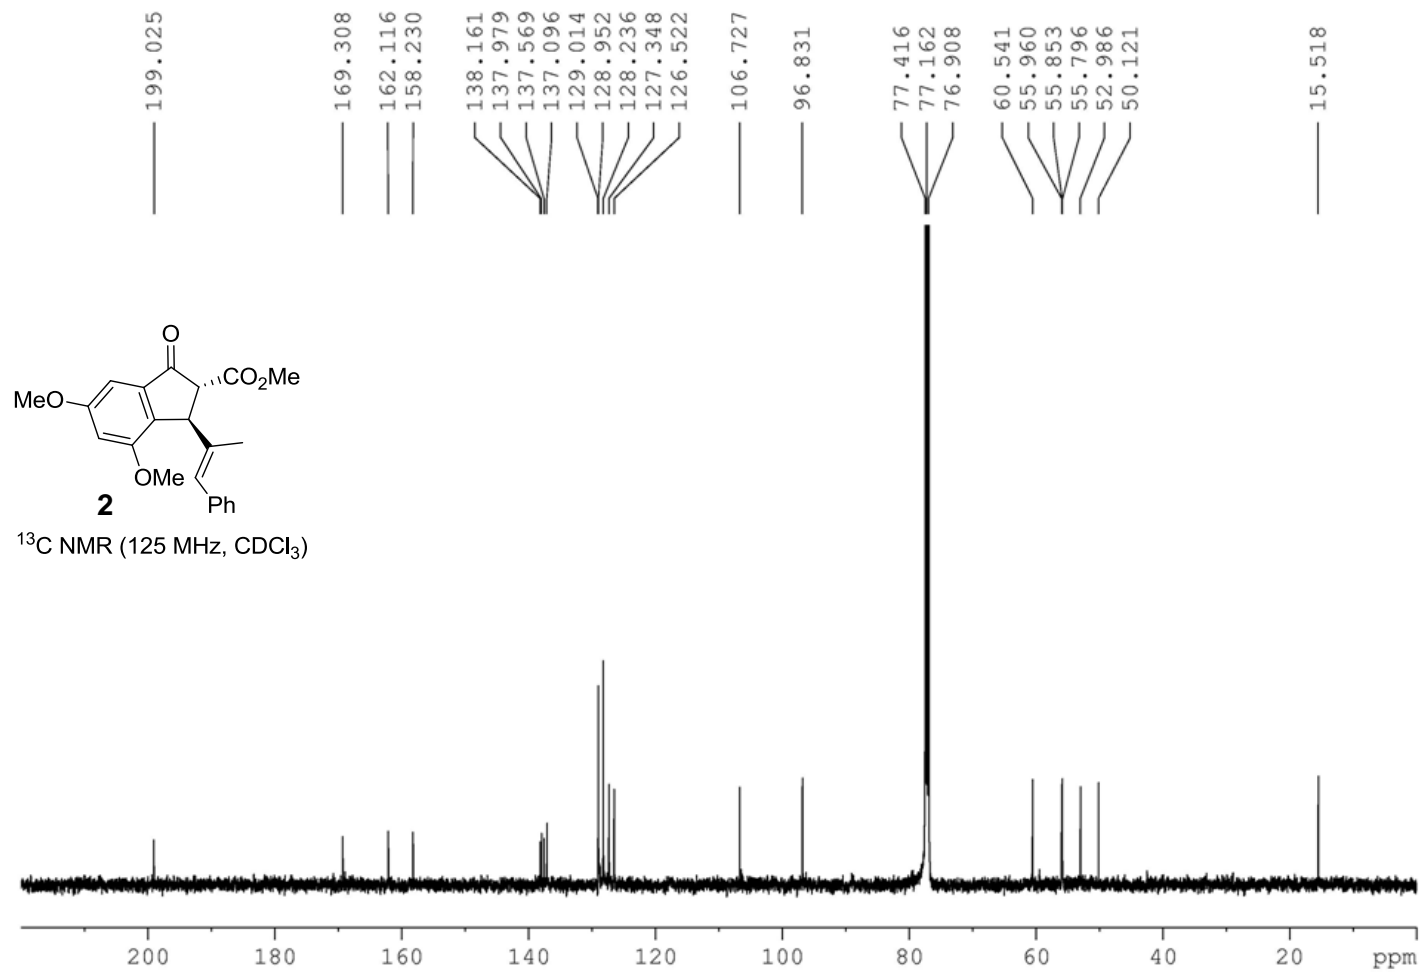

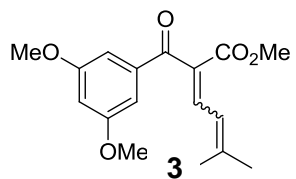

<sup>1</sup>H NMR (500 MHz, CDCl<sub>3</sub>)

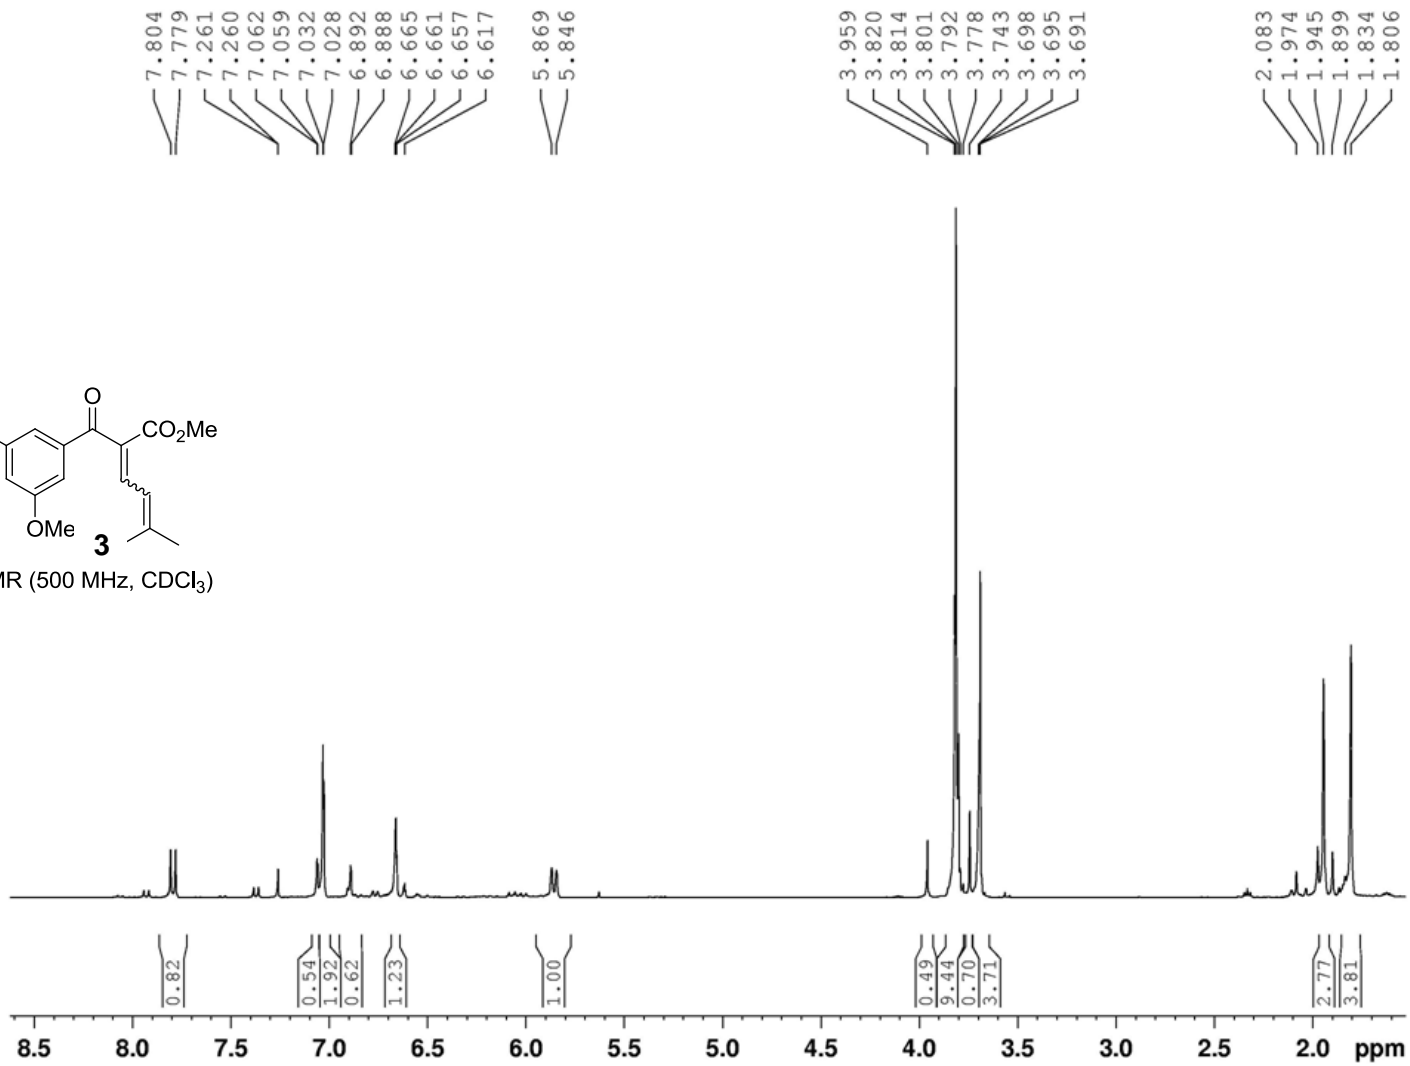

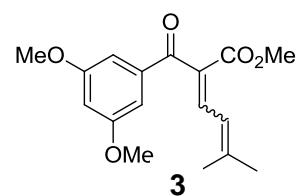

$^{13}\text{C}$  NMR (125 MHz,  $\text{CDCl}_3$ )

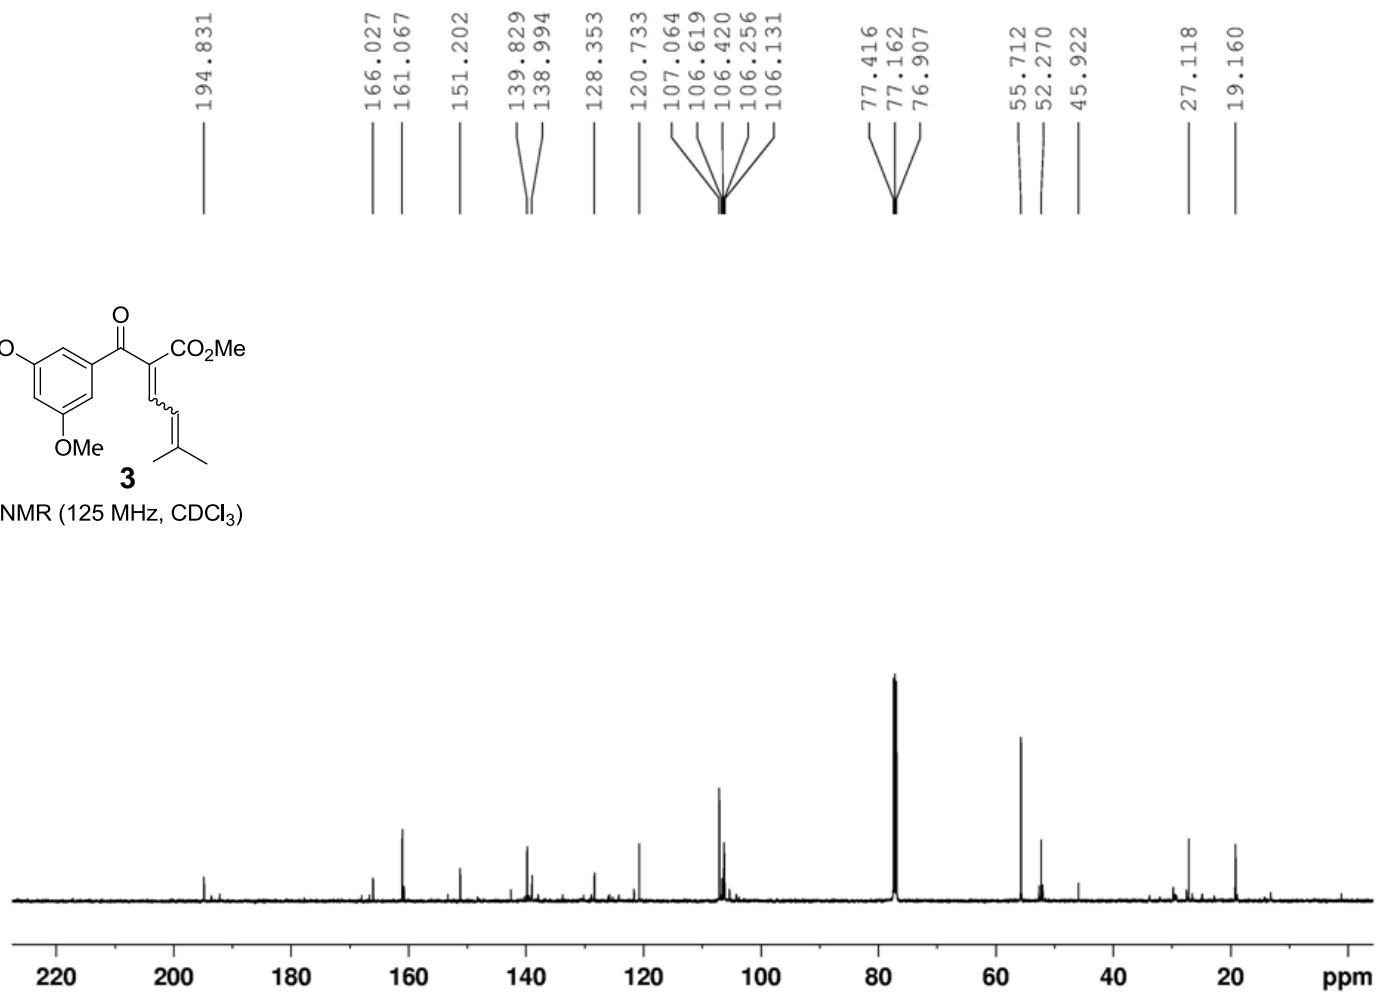

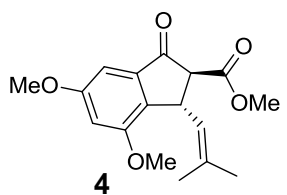

$^1\text{H NMR}$  (500 MHz,  $\text{CDCl}_3$ )

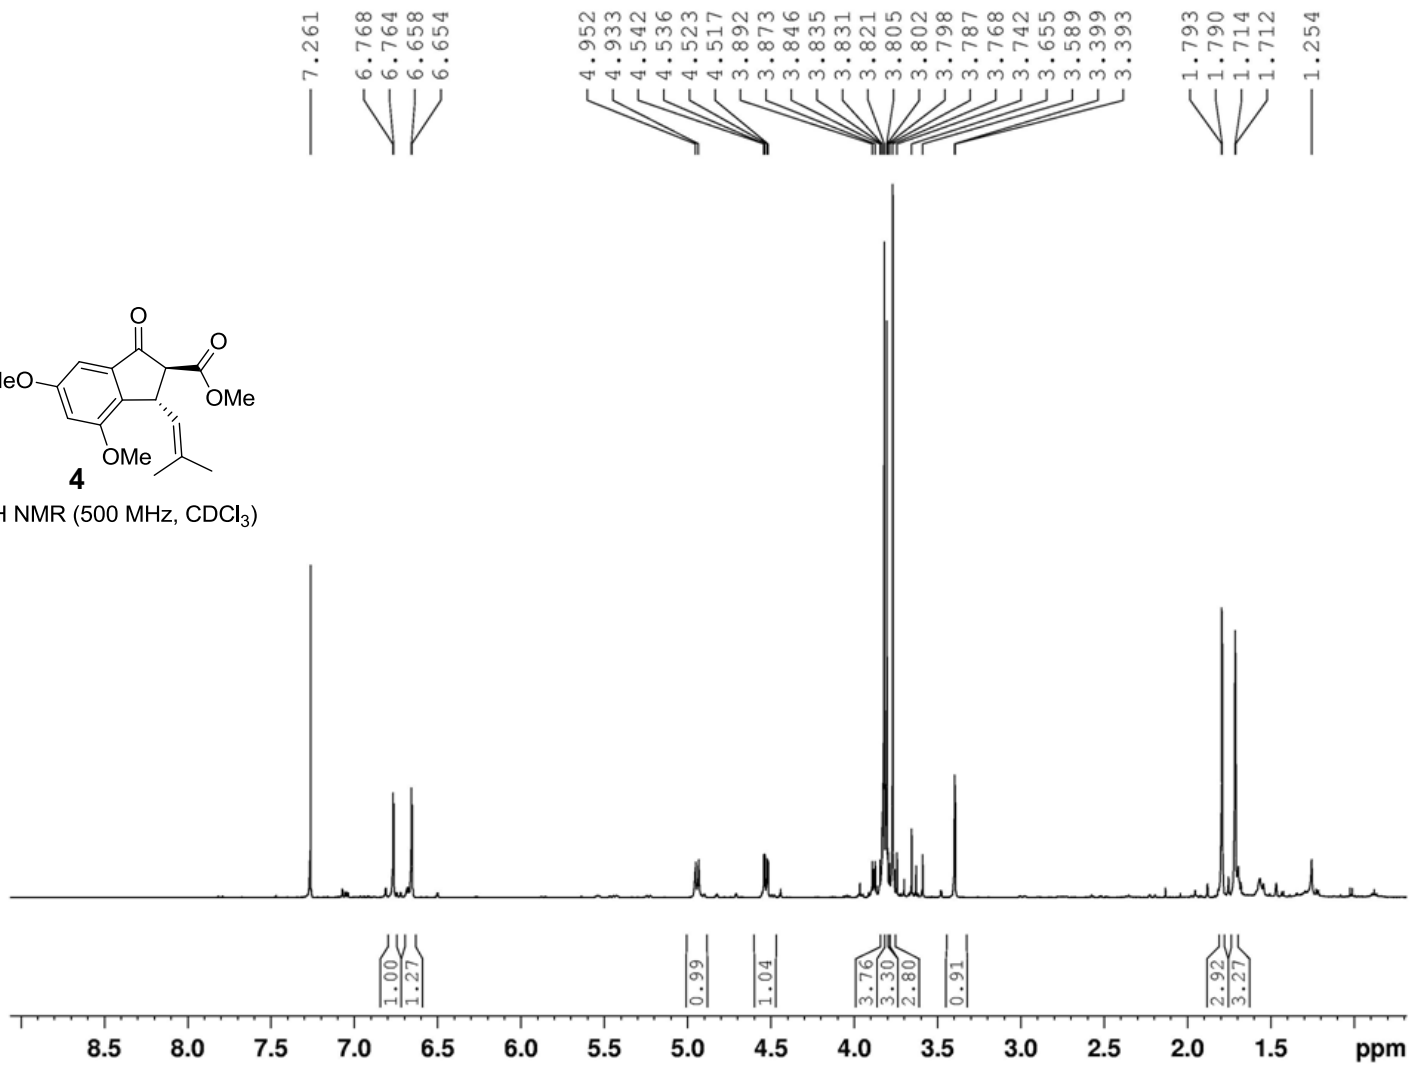



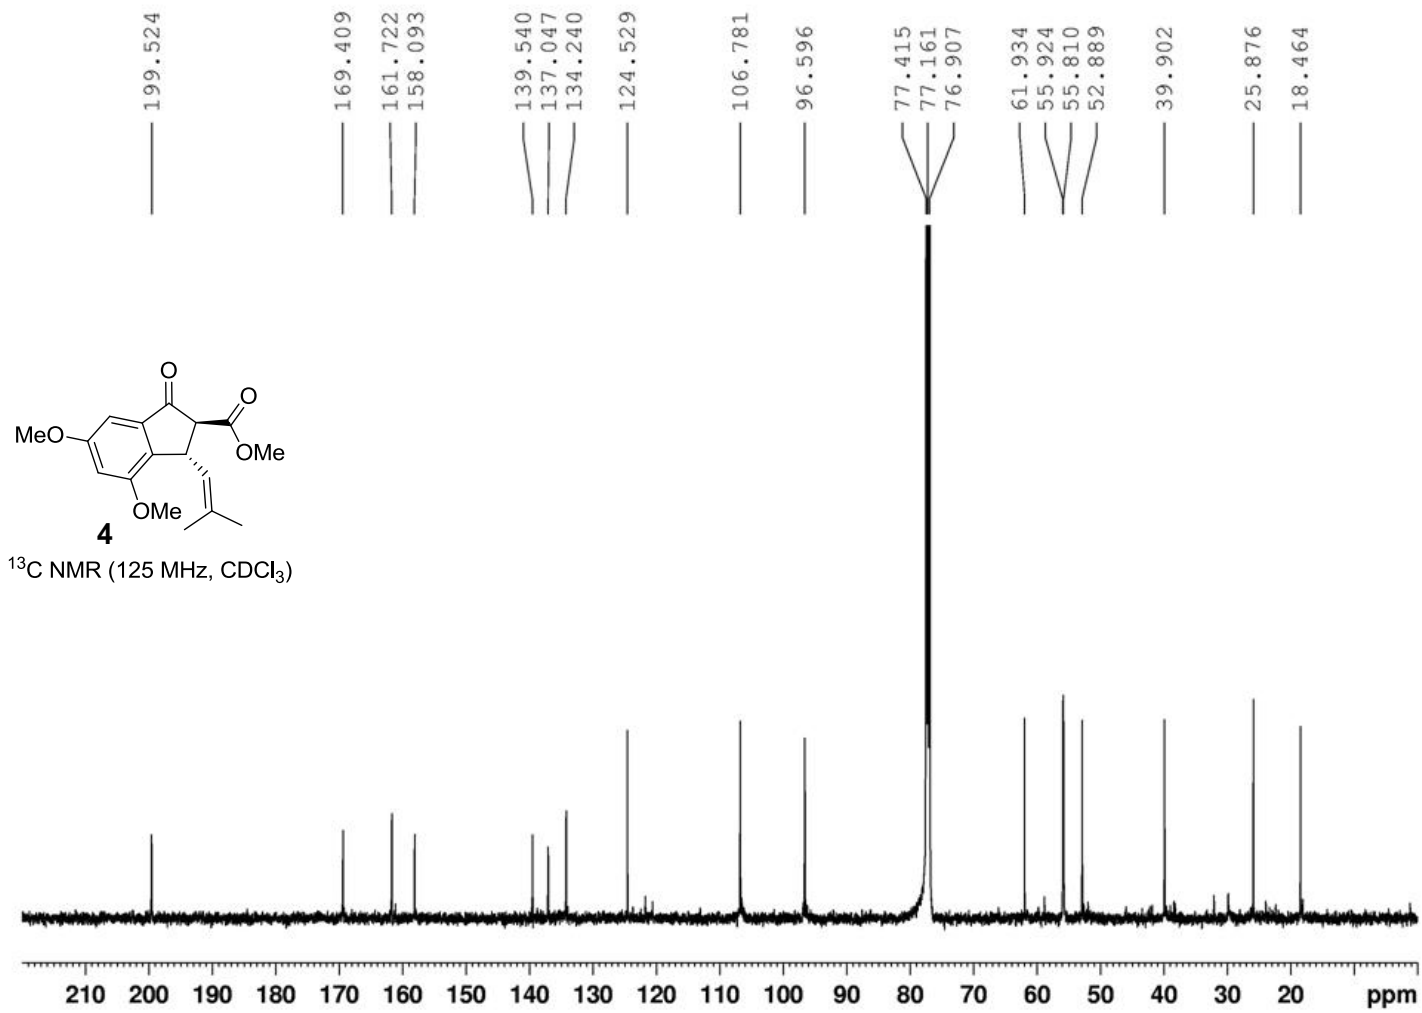

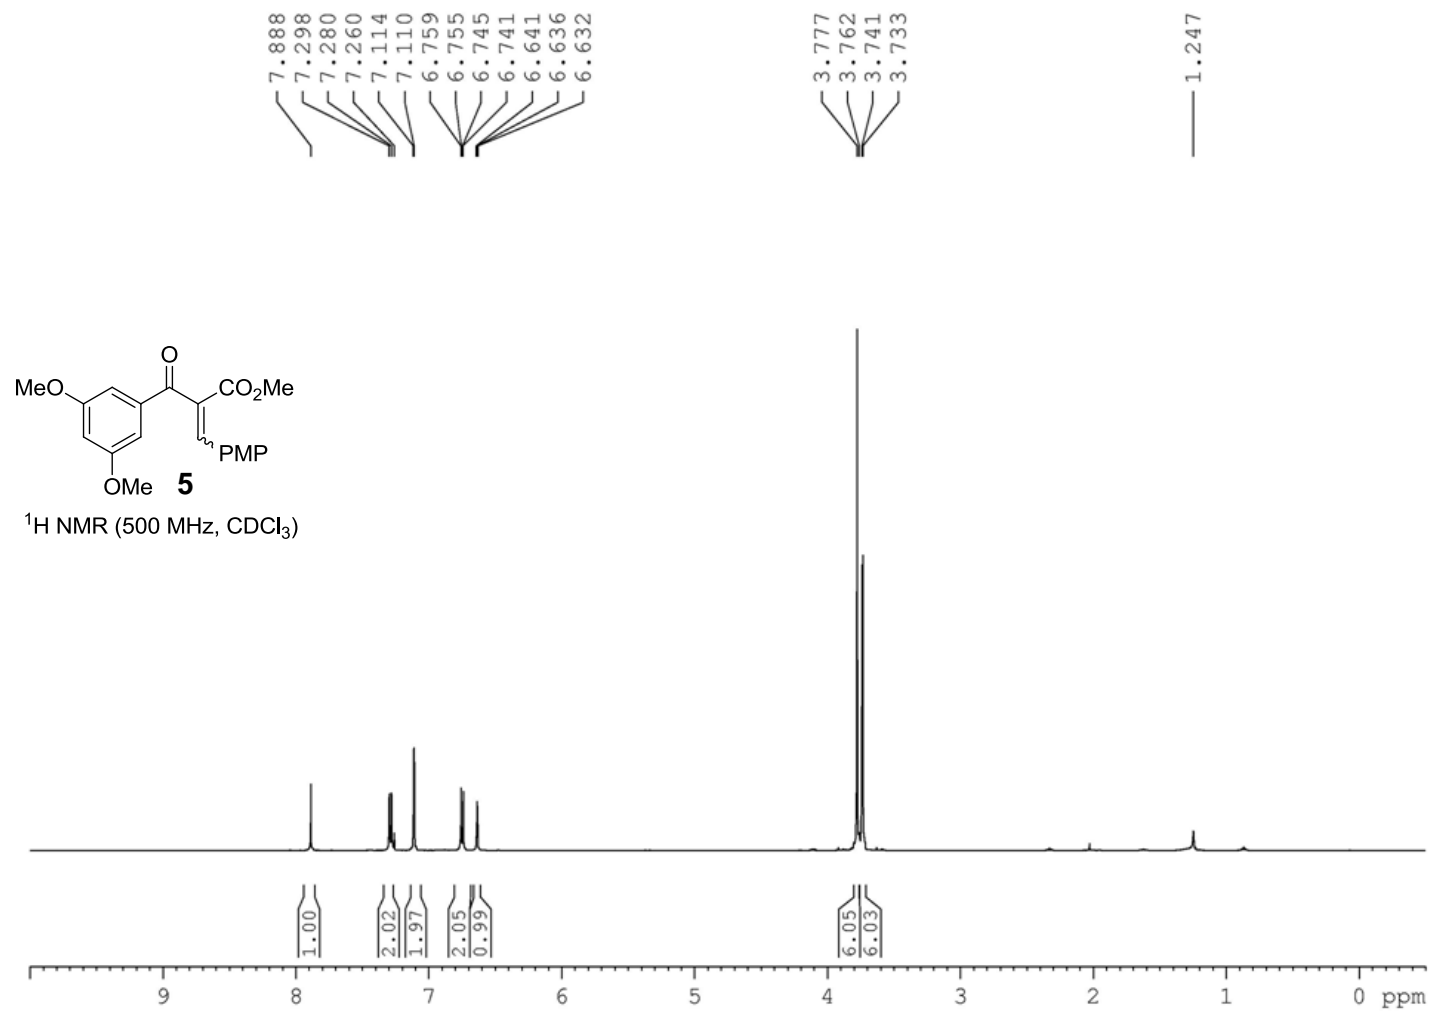

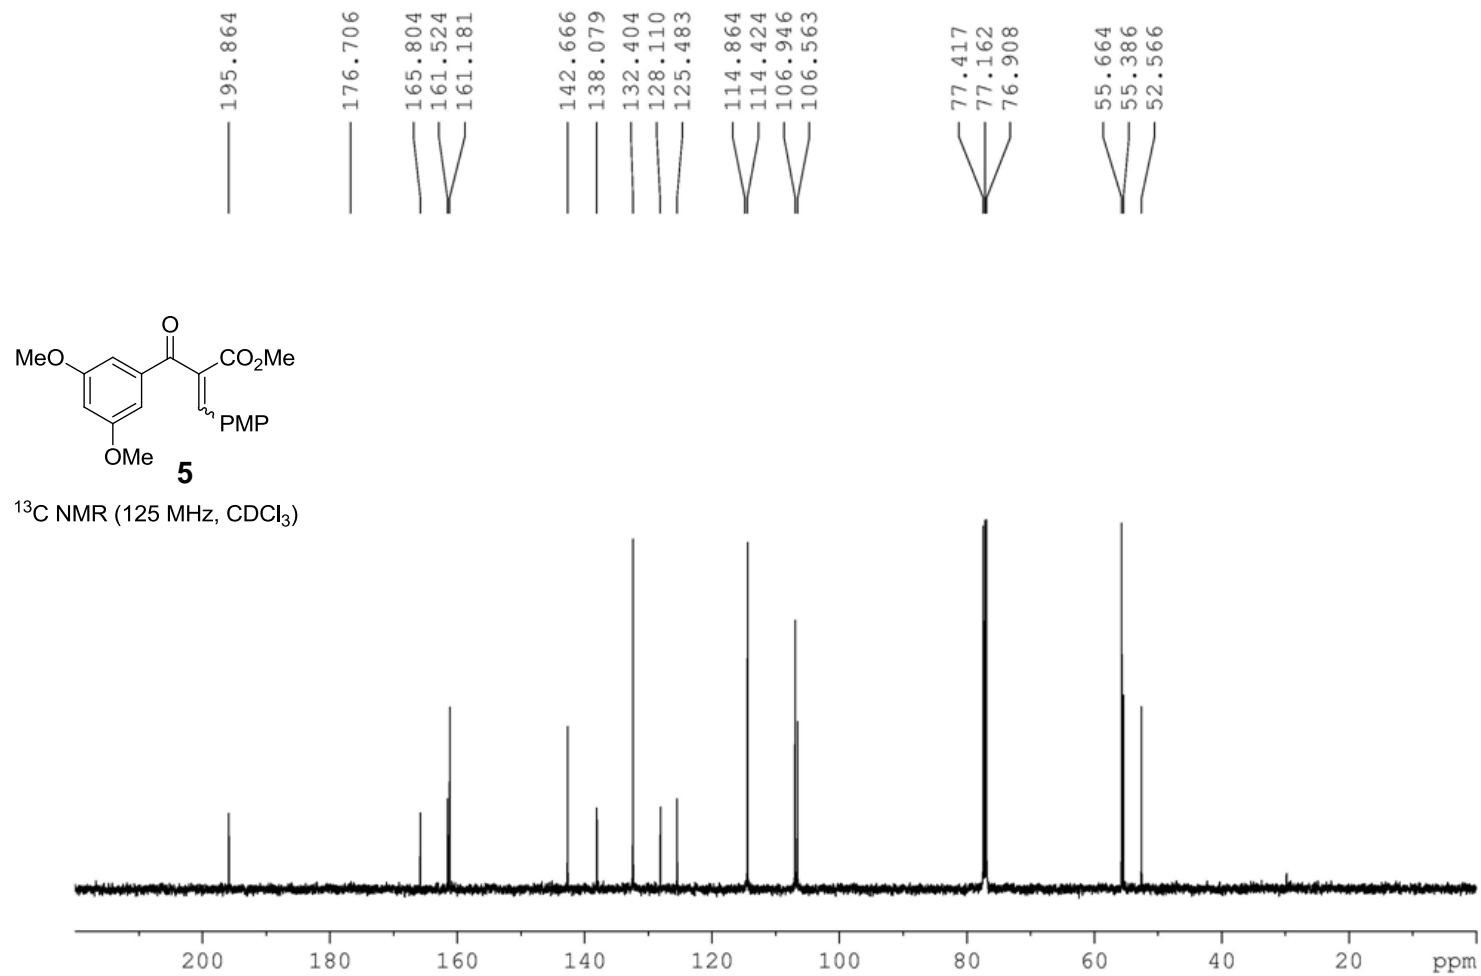

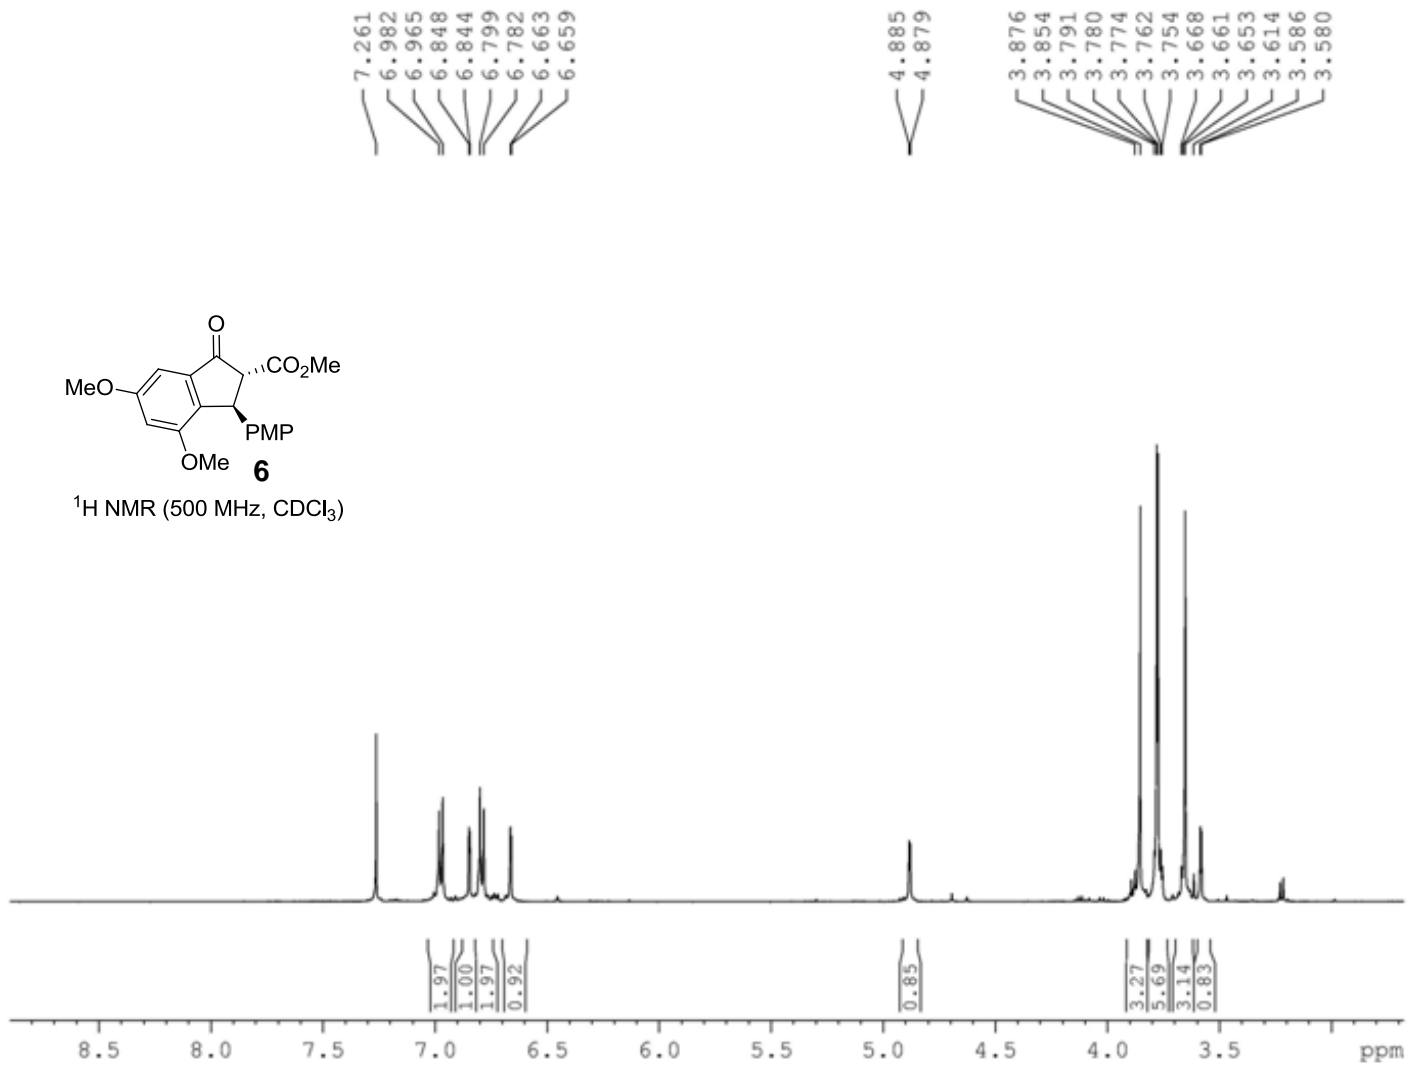

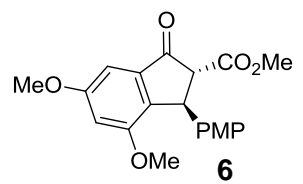

<sup>13</sup>C NMR (125 MHz, CDCl<sub>3</sub>)

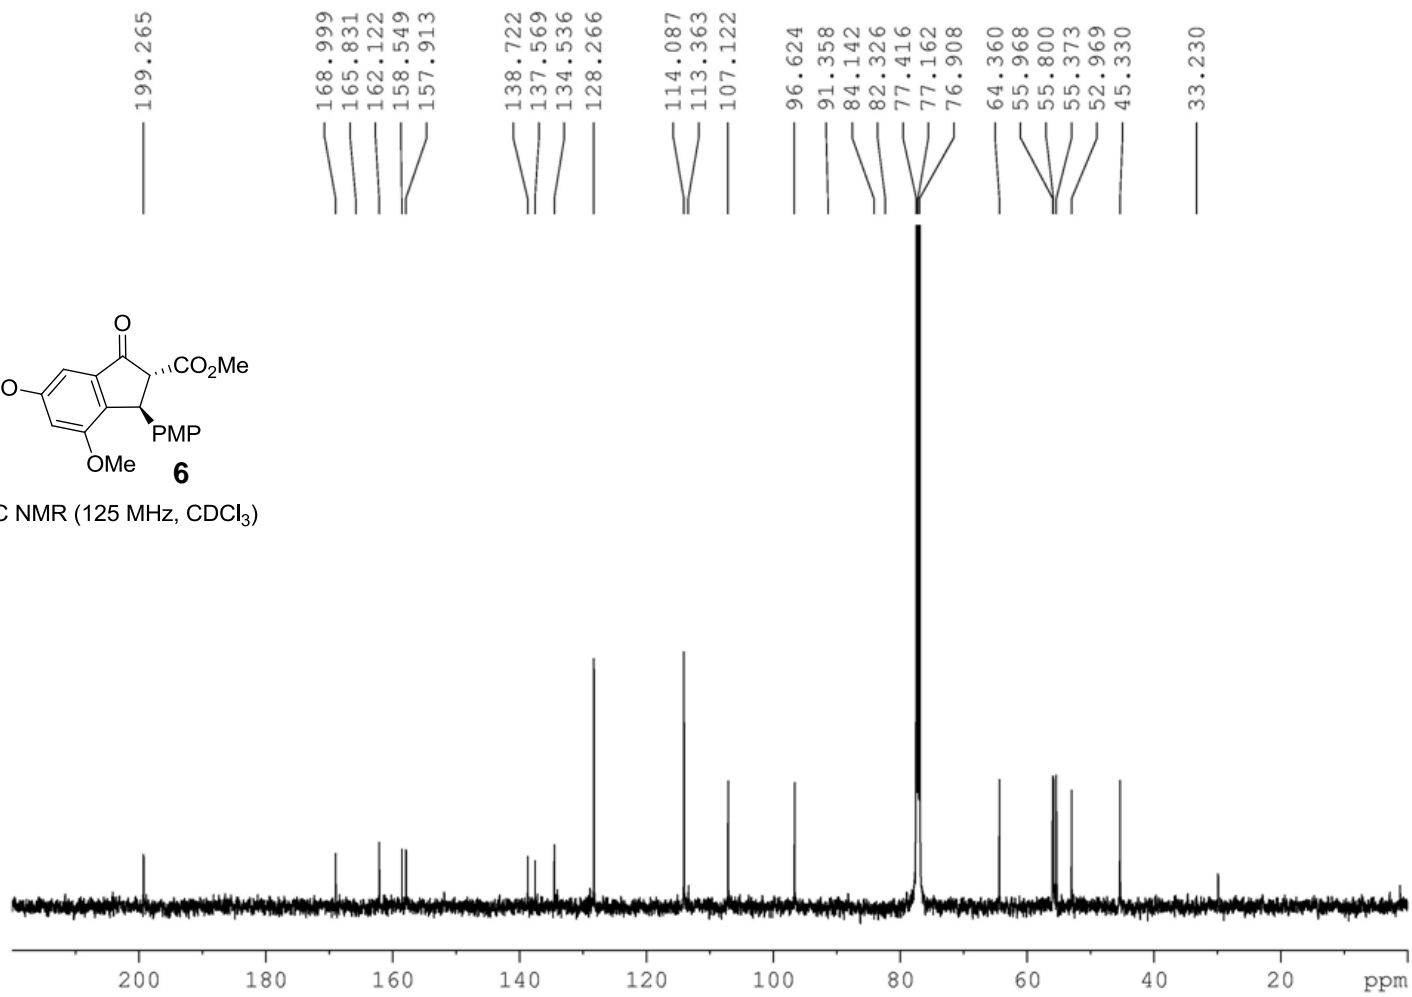

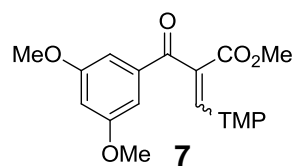

<sup>1</sup>H NMR (400 MHz, CDCl<sub>3</sub>)

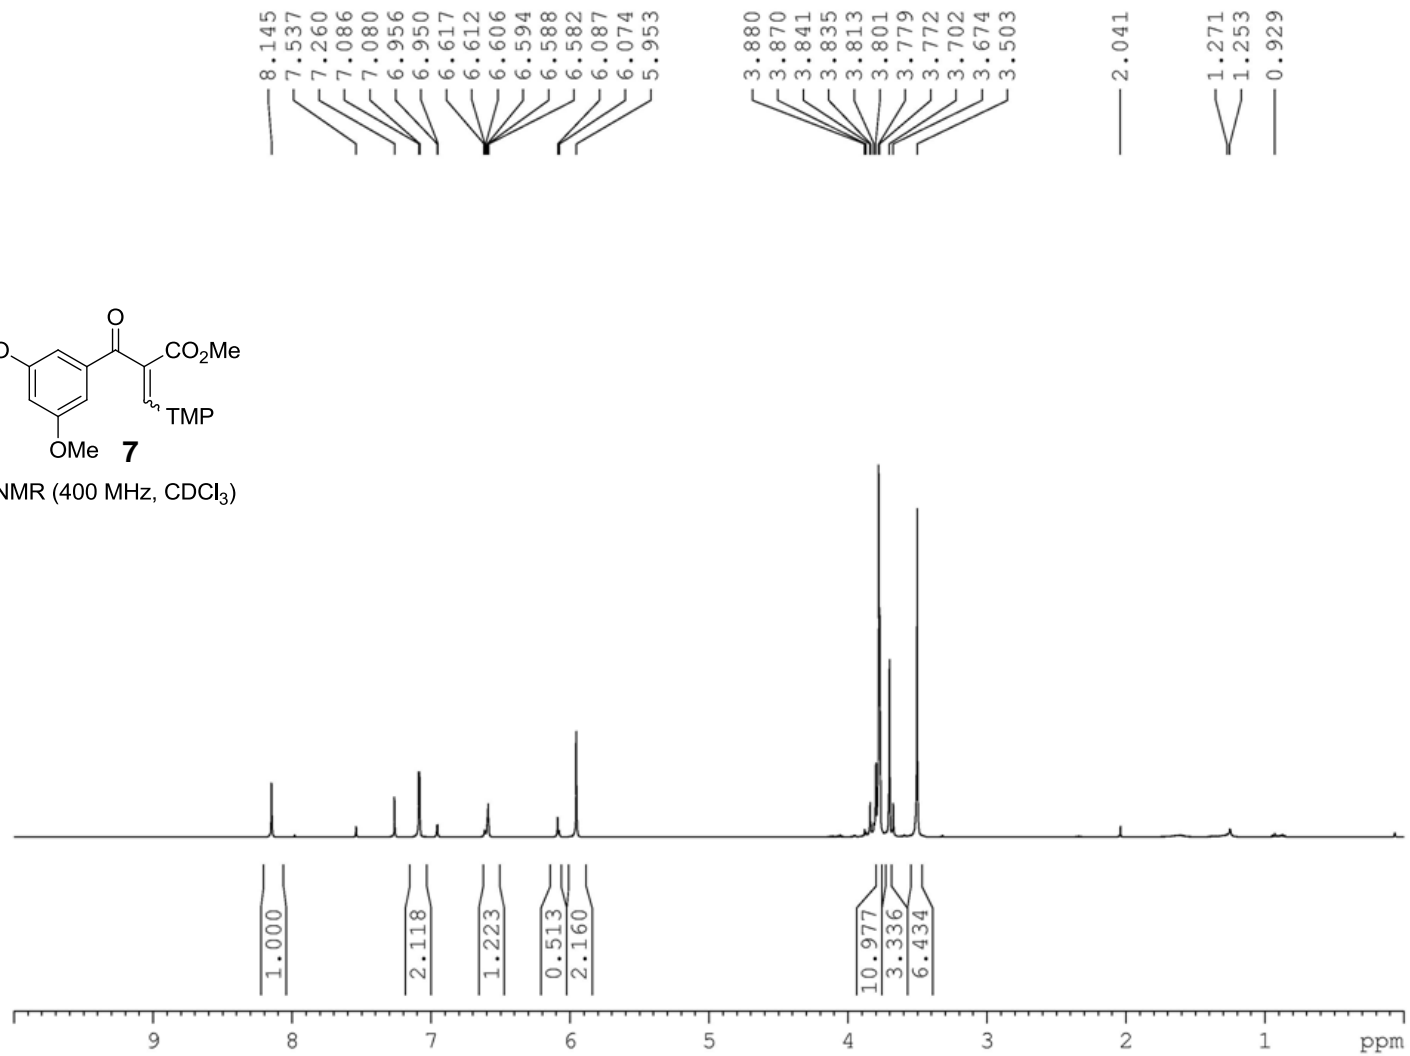

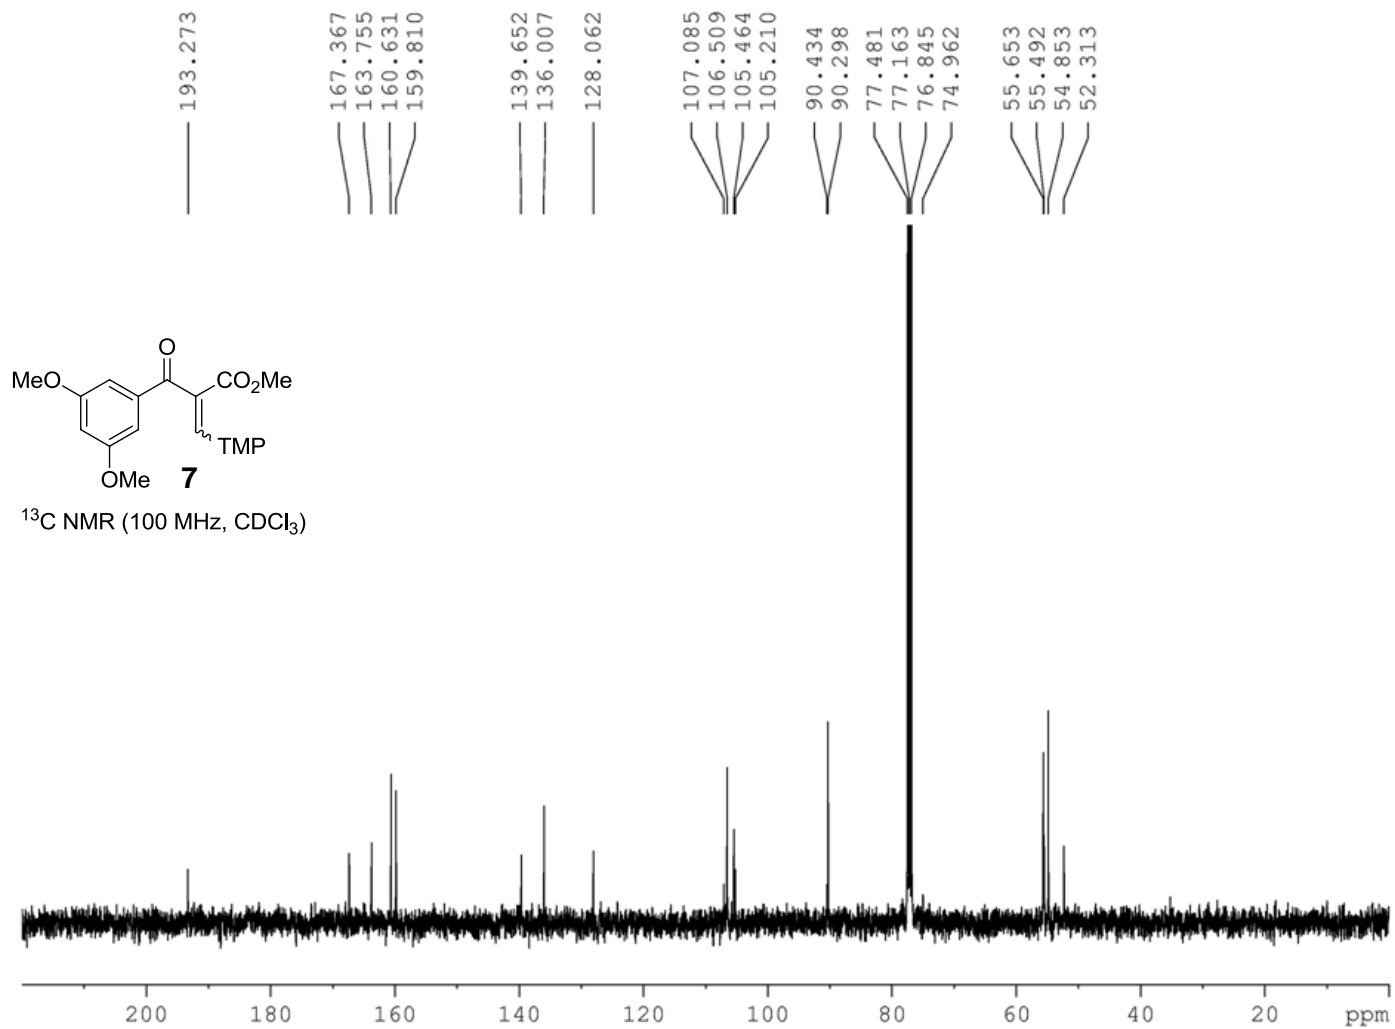

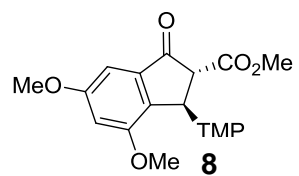

$^1\text{H NMR}$  (500 MHz,  $\text{CDCl}_3$ )

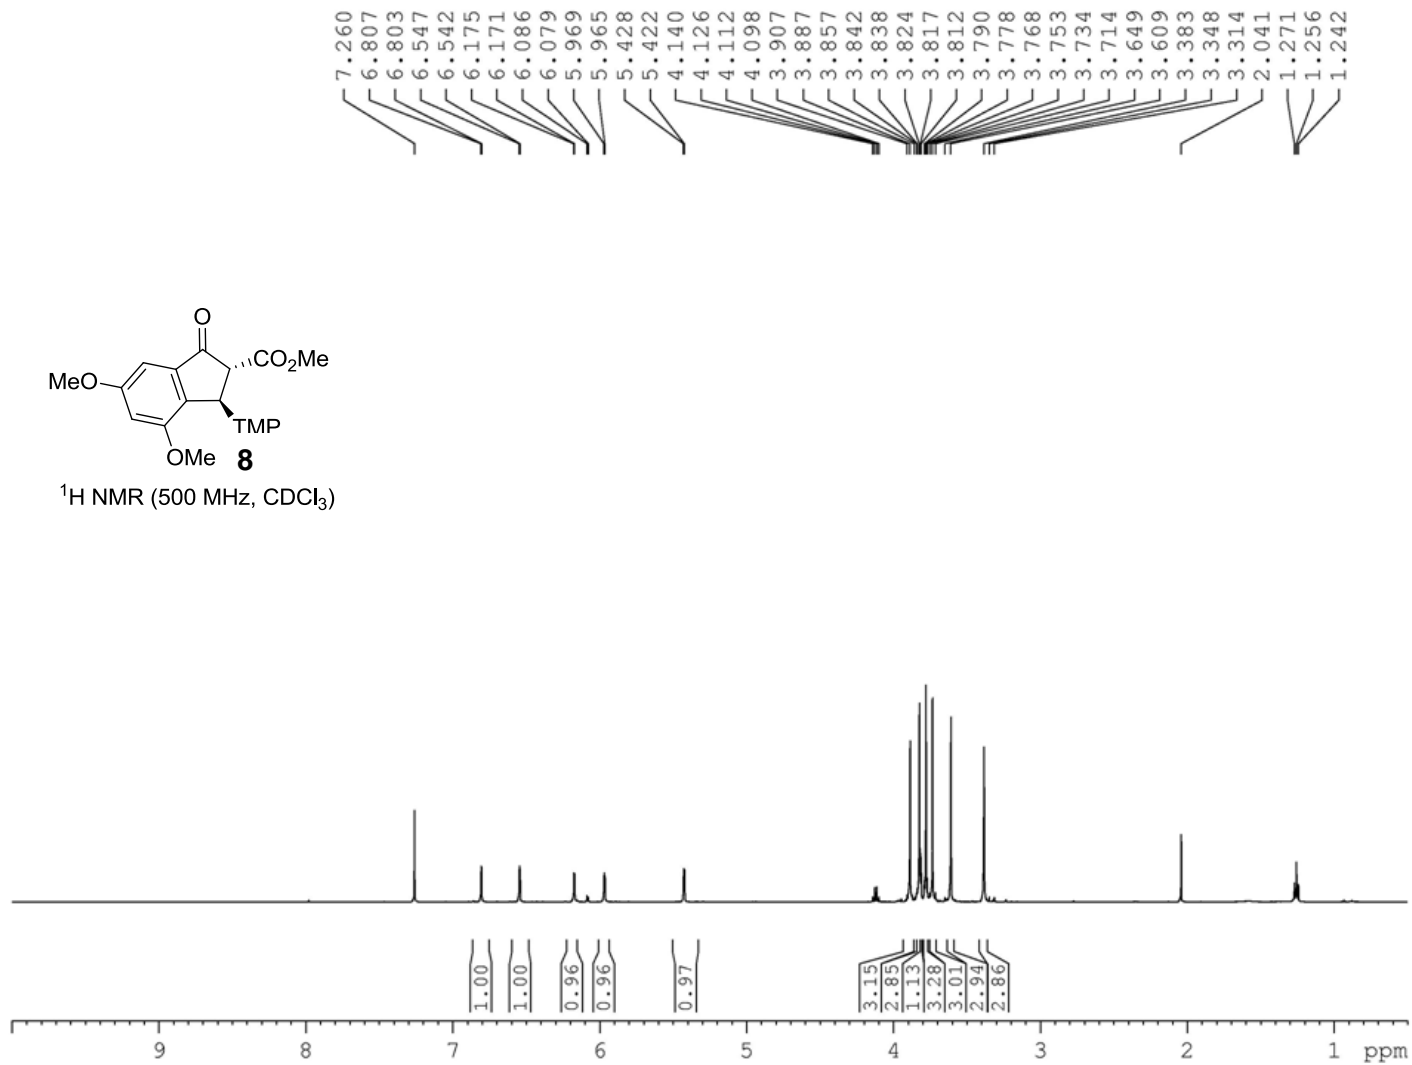



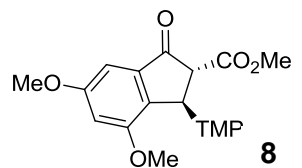

<sup>13</sup>C NMR (125 MHz, CDCl<sub>3</sub>)

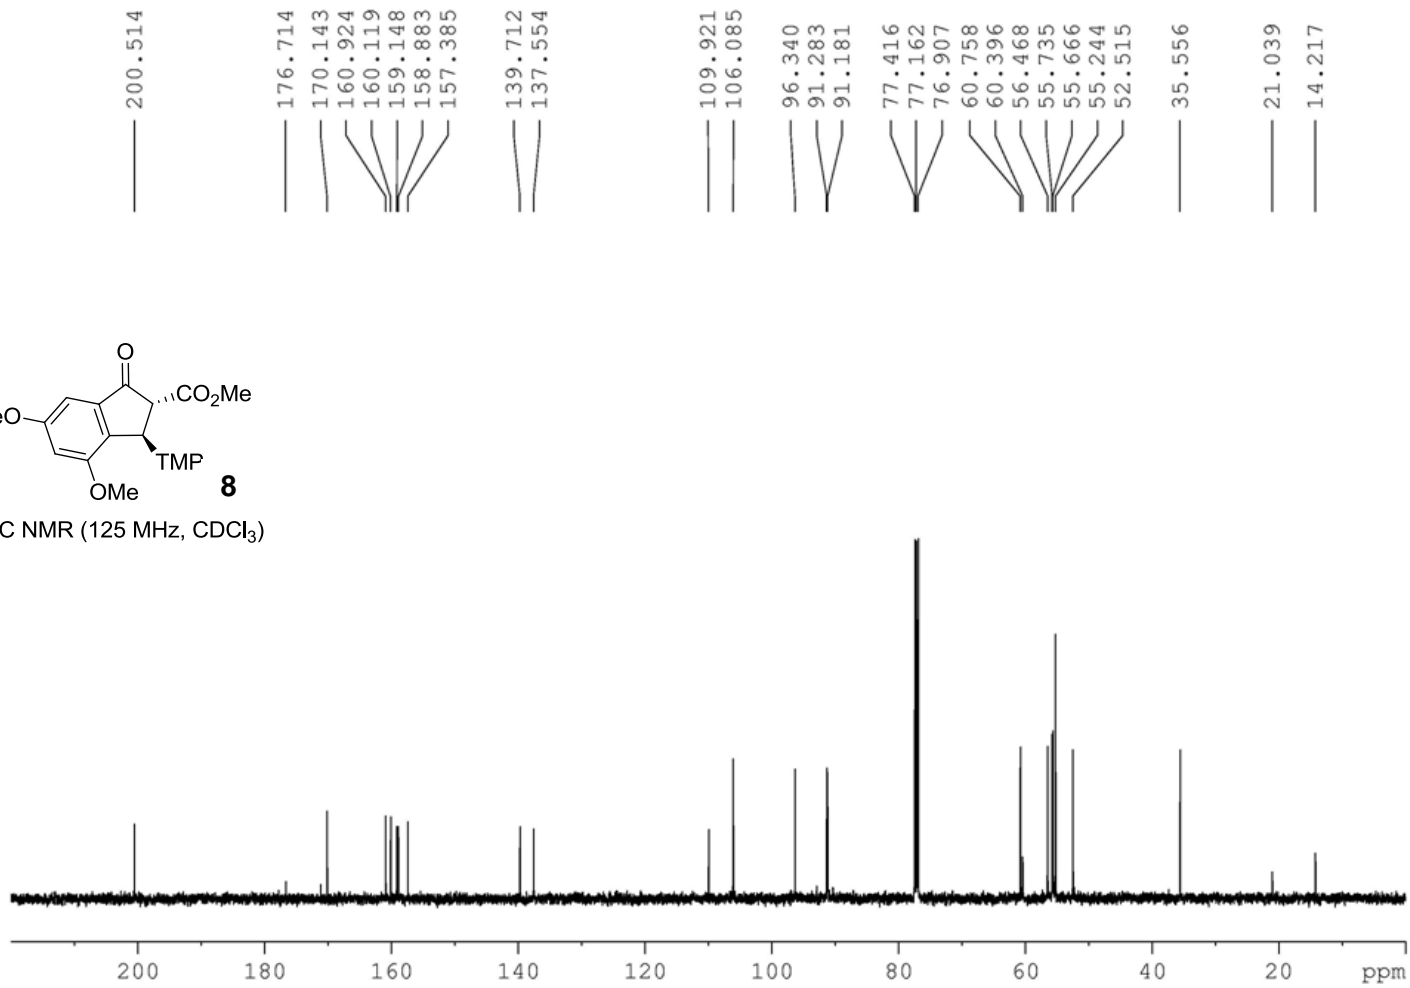

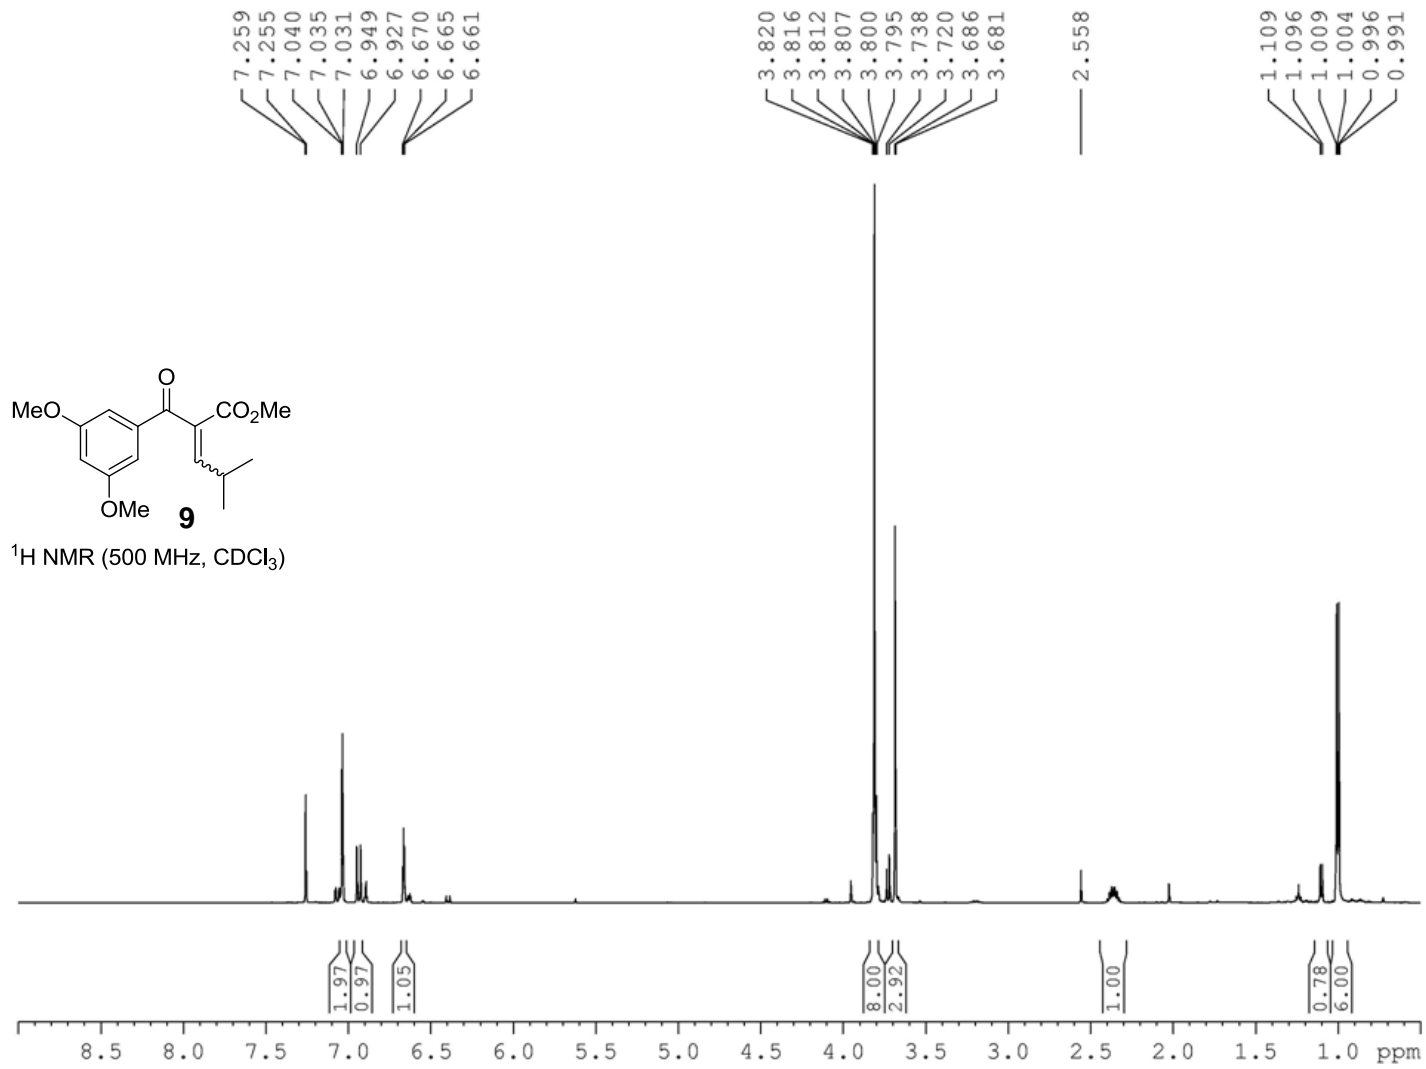

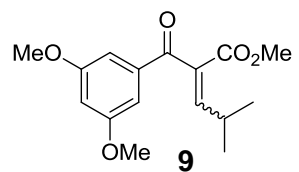

<sup>13</sup>C NMR (125 MHz, CDCl<sub>3</sub>)

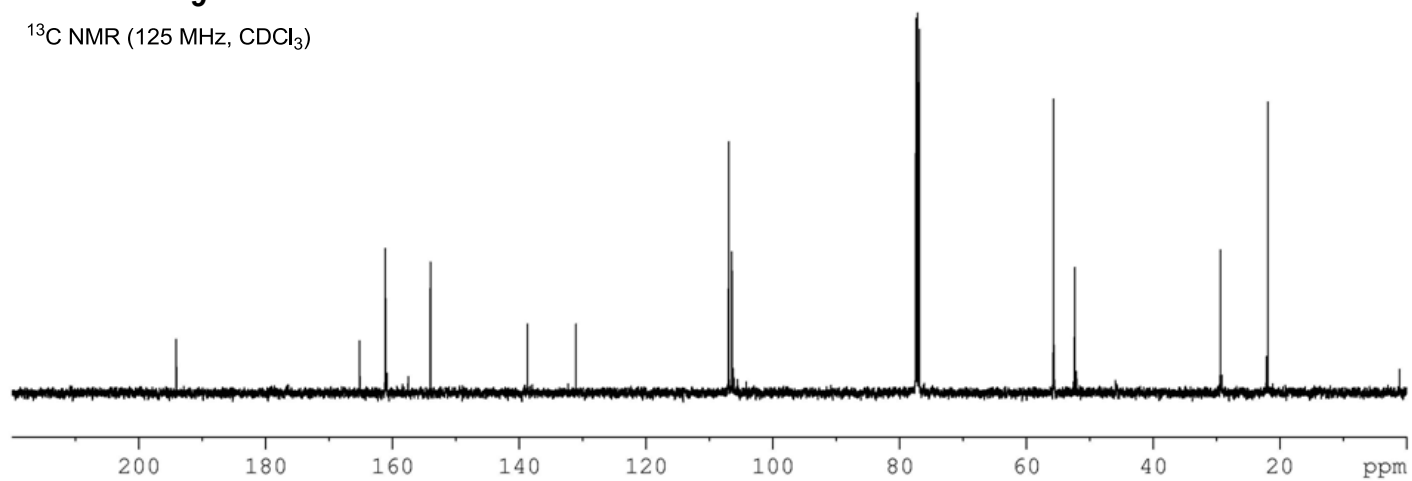

194.117

165.188  
161.114  
160.819  
157.505  
154.018

138.670  
132.283  
131.059

107.032  
106.935  
106.440  
106.255  
106.123  
105.552  
104.166  
99.652

77.415  
77.162  
76.907

55.704  
52.588  
52.352  
52.109  
45.918

29.364  
29.137  
22.124  
21.905

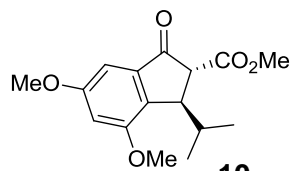

$^1\text{H NMR}$  (500 MHz,  $\text{CDCl}_3$ )

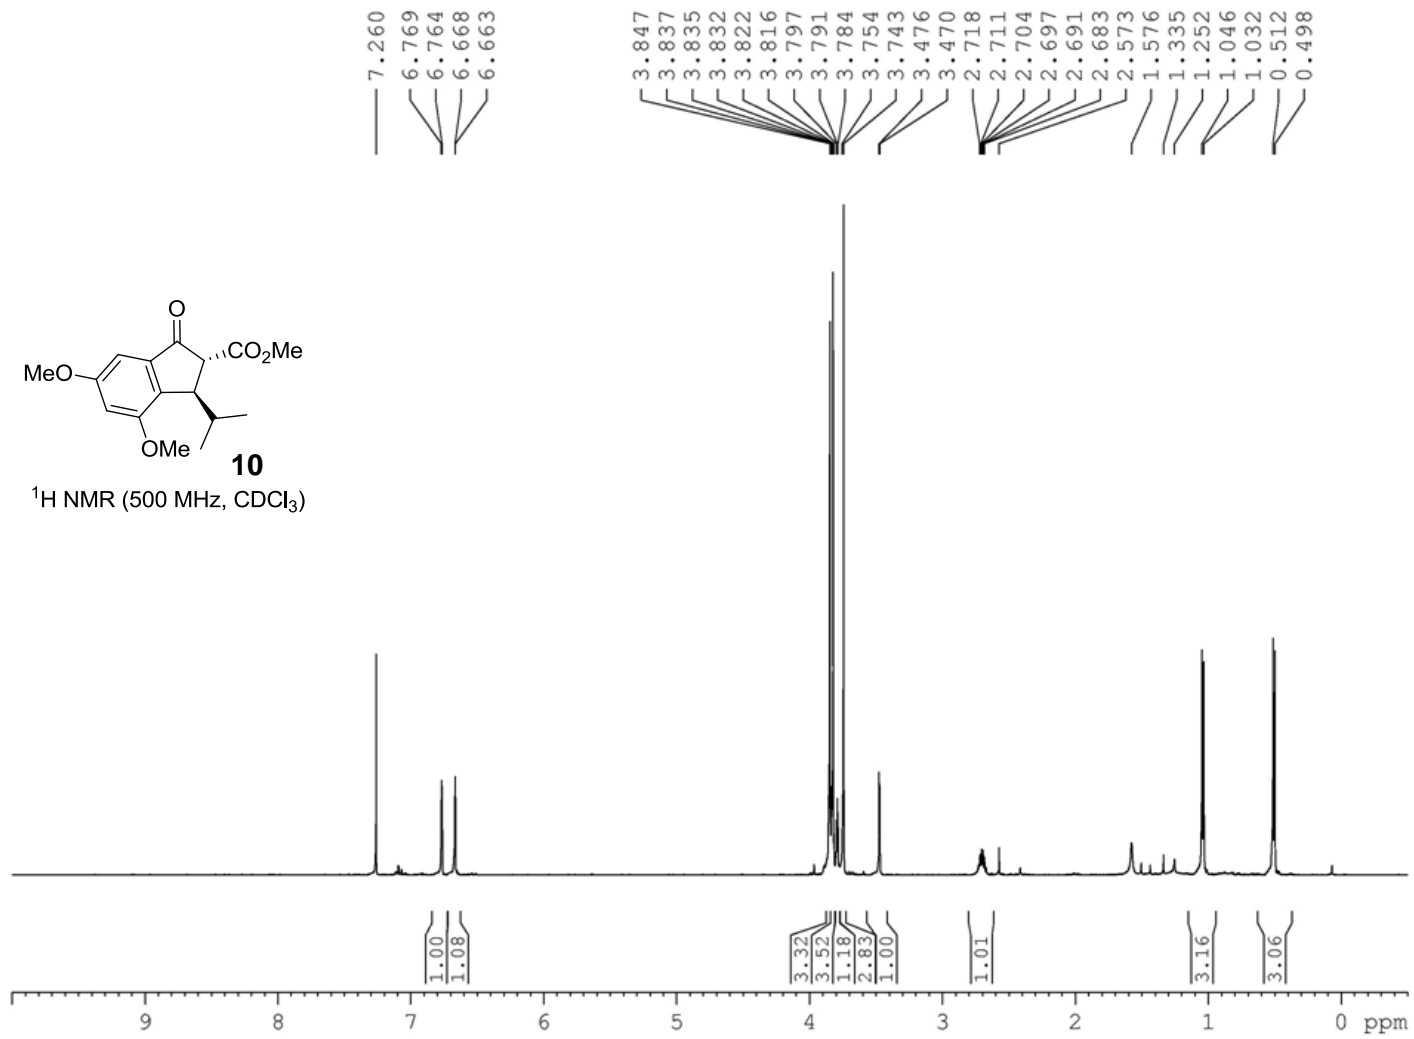

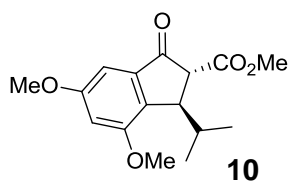

<sup>13</sup>C NMR (125 MHz, CDCl<sub>3</sub>)

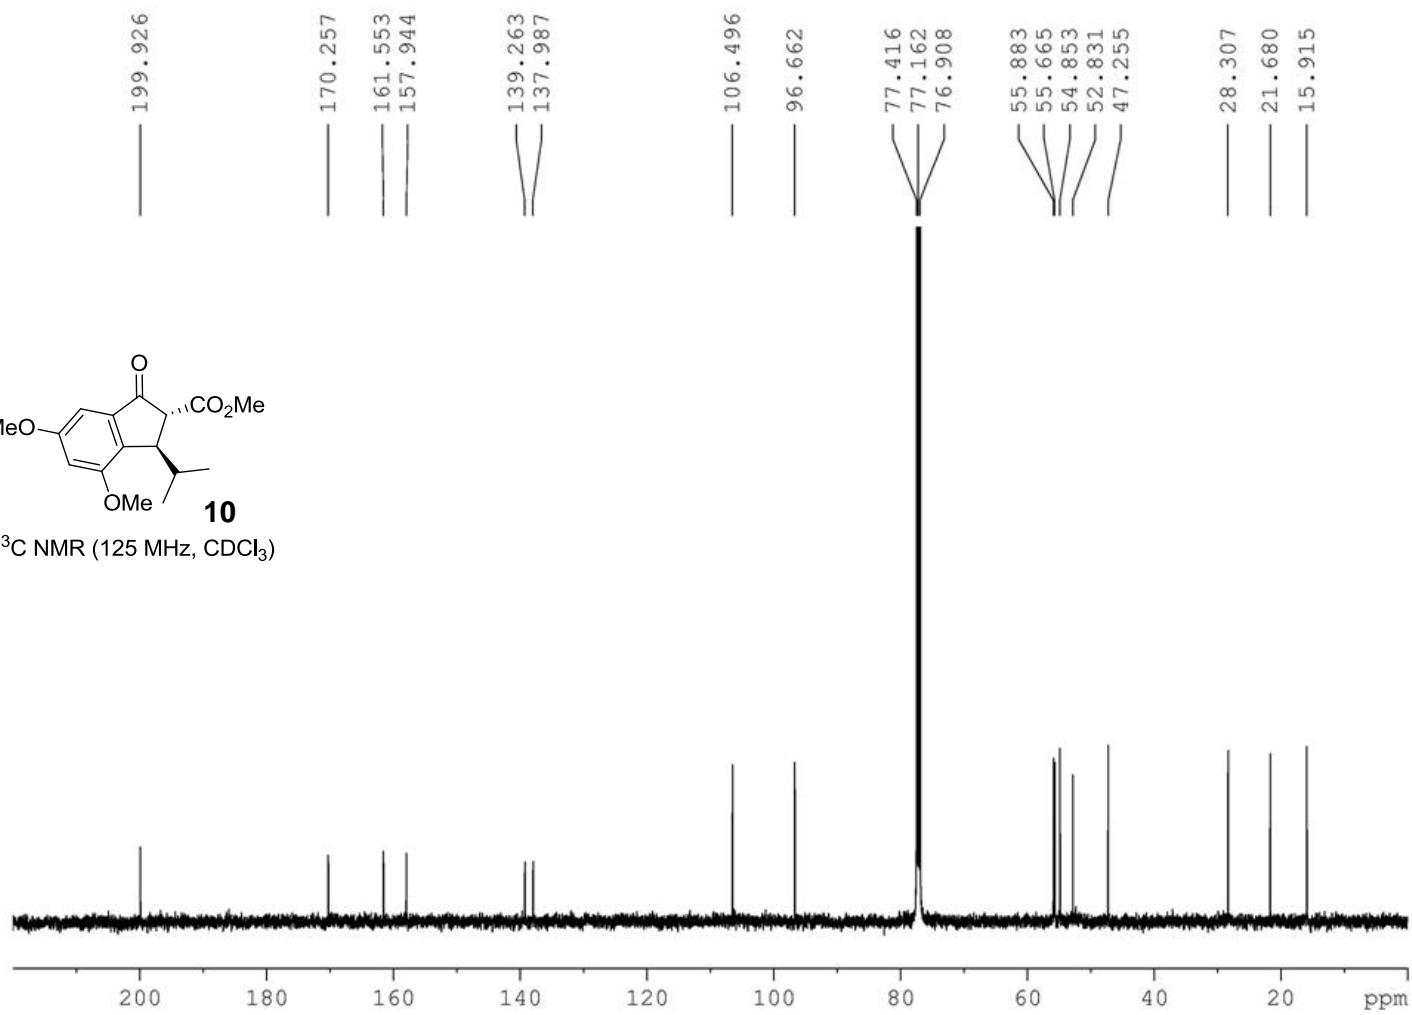

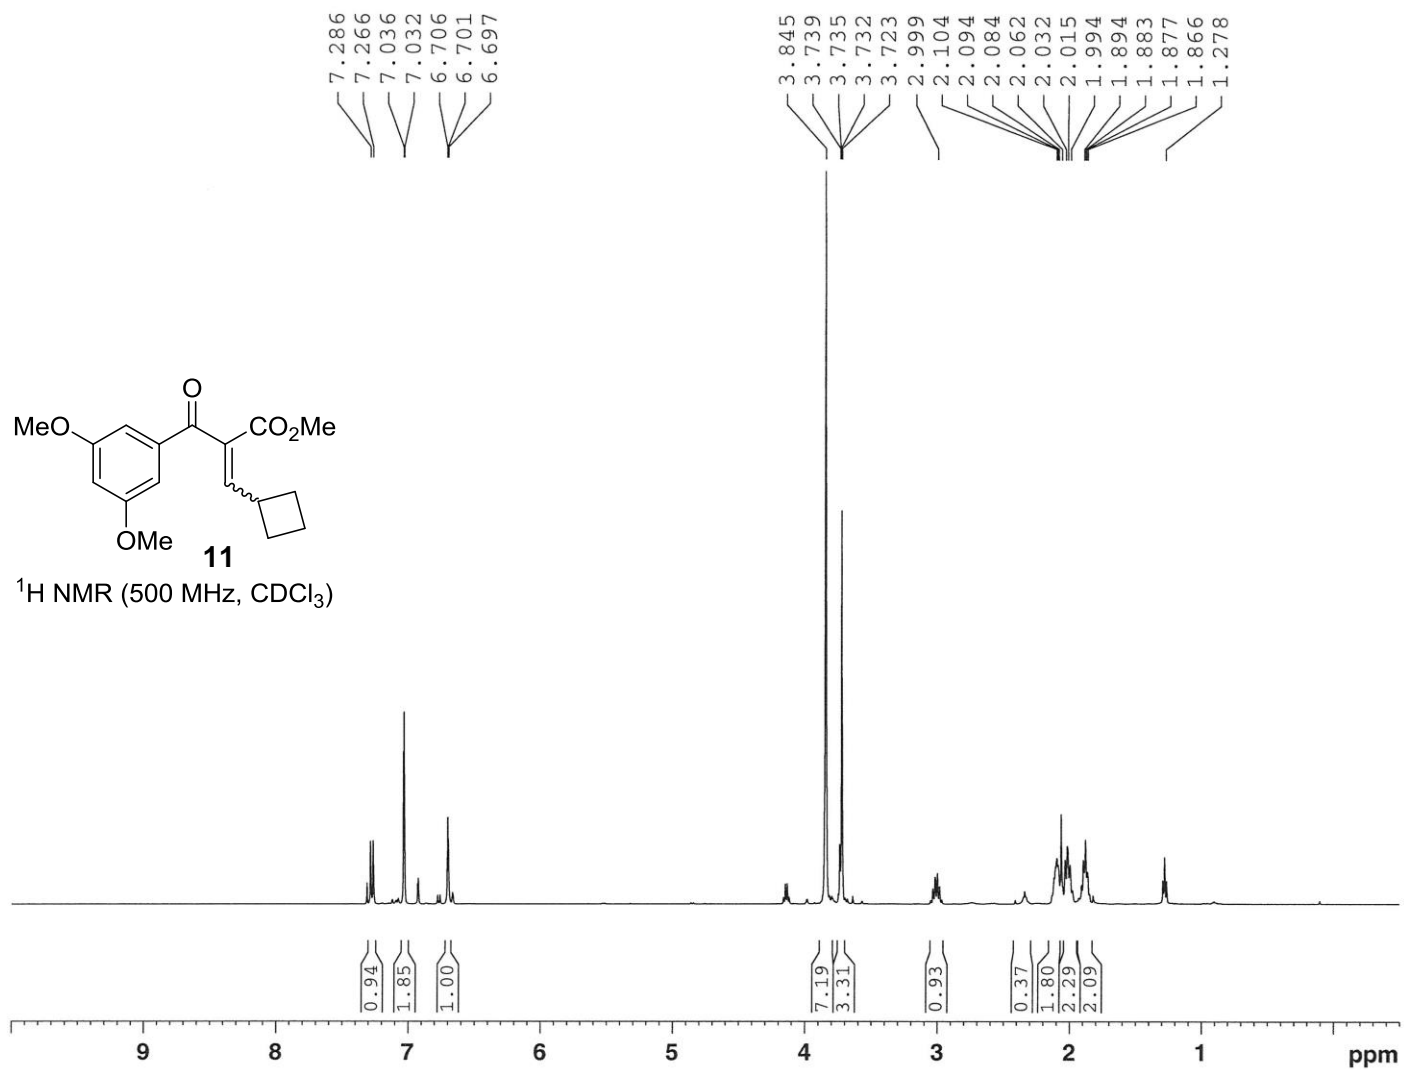

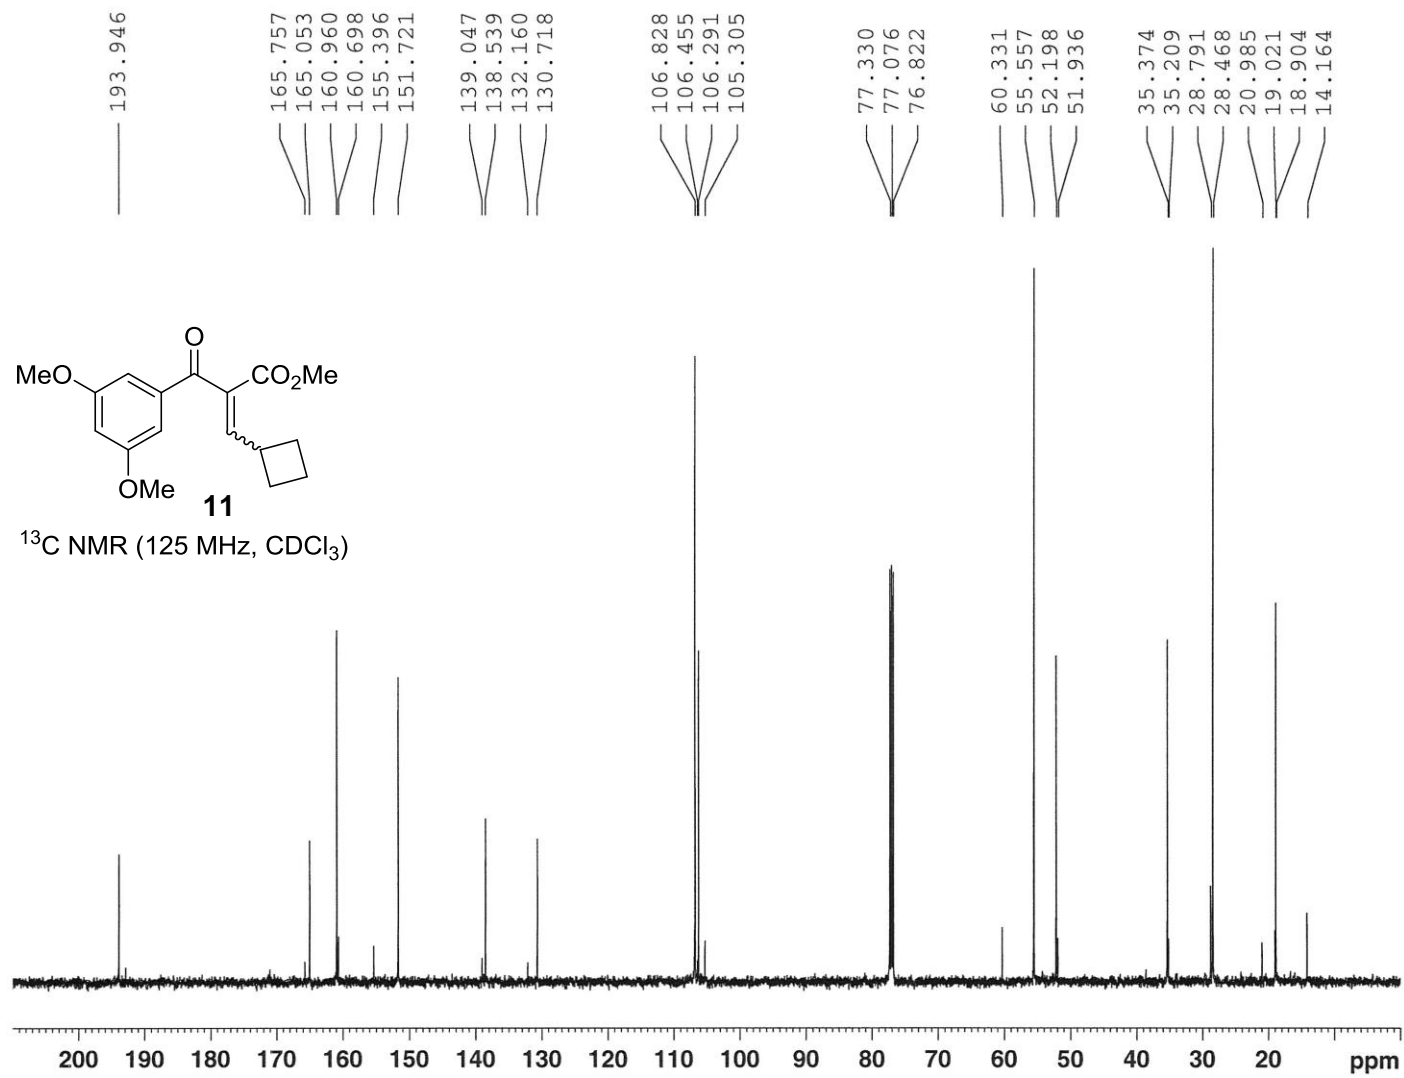

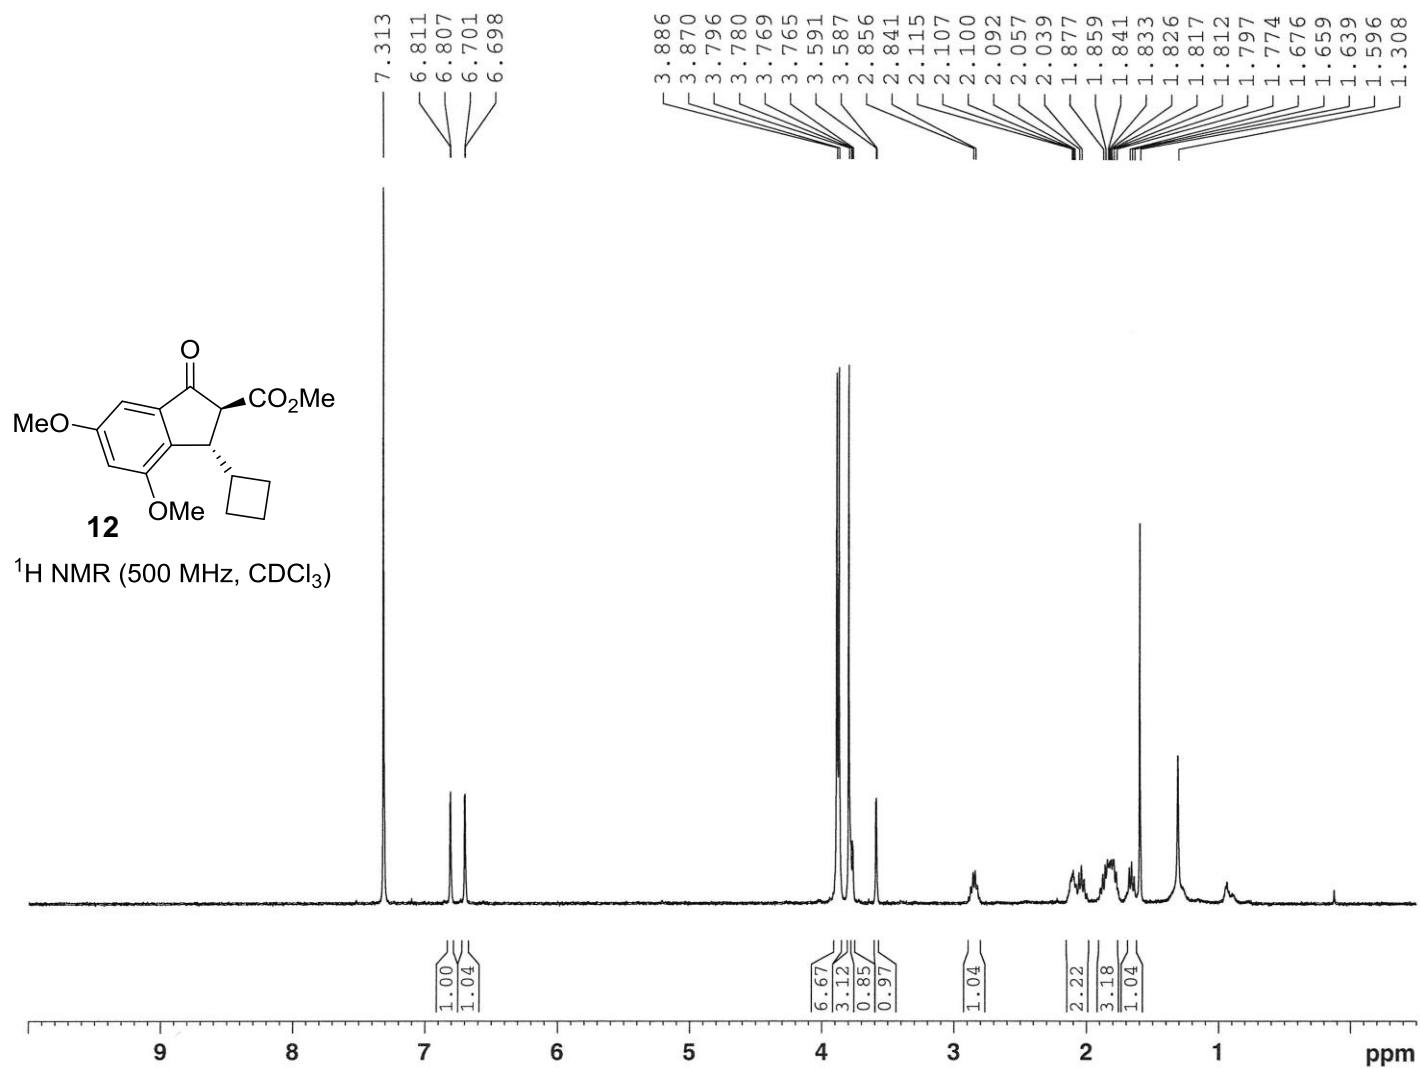



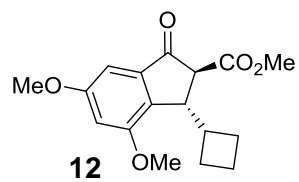

<sup>13</sup>C NMR (125 MHz, CDCl<sub>3</sub>)

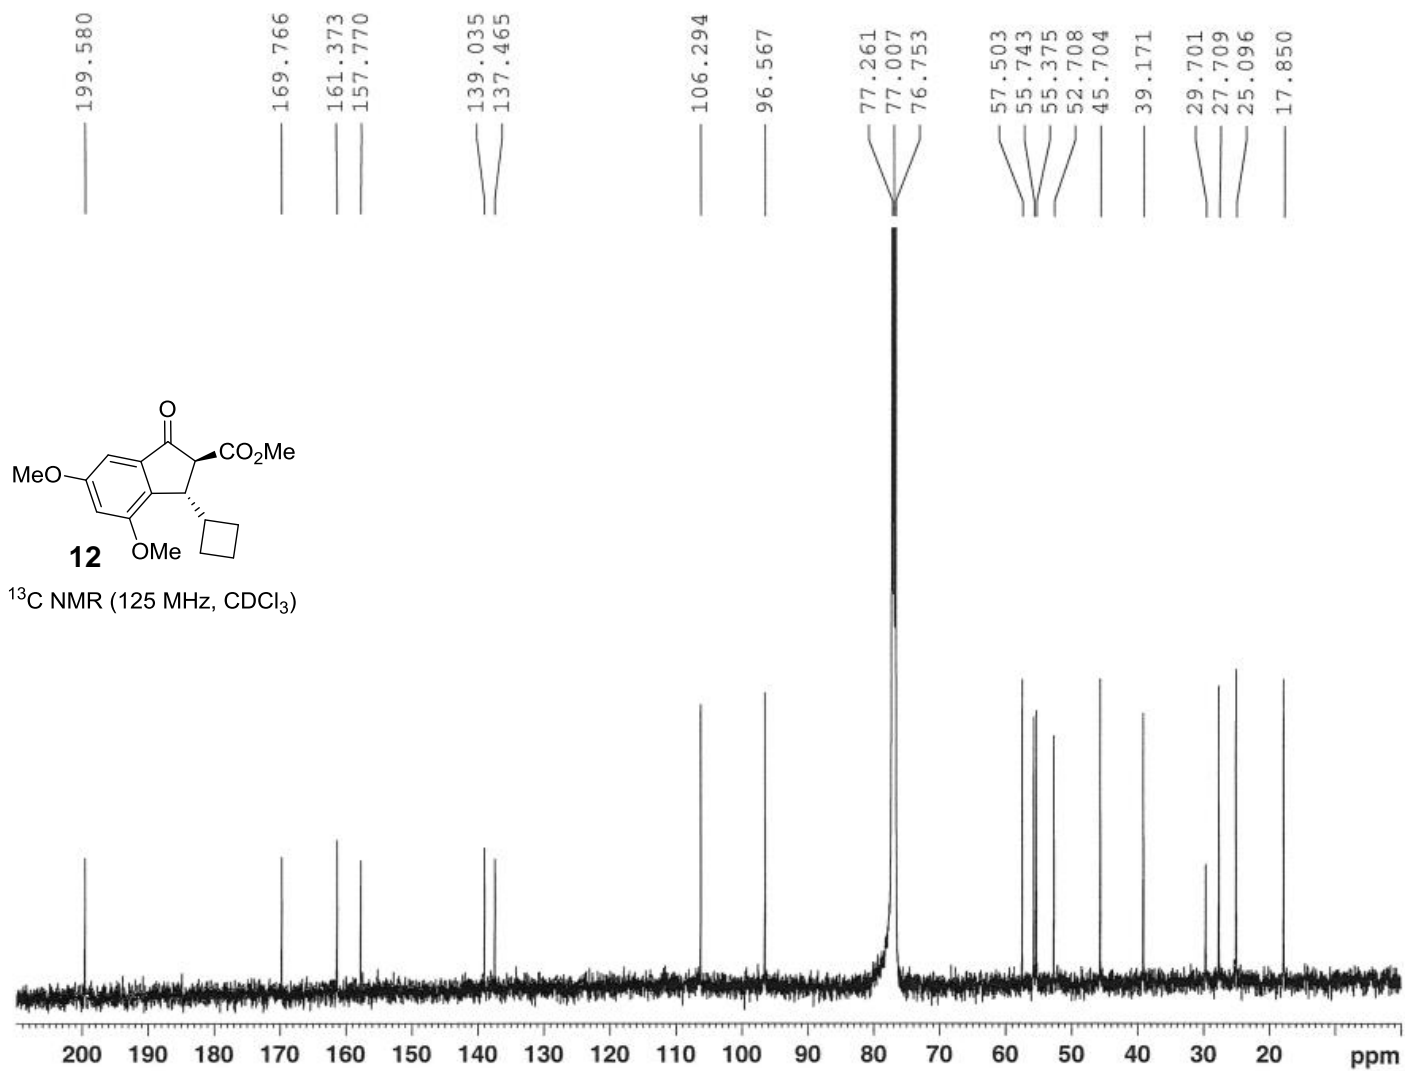

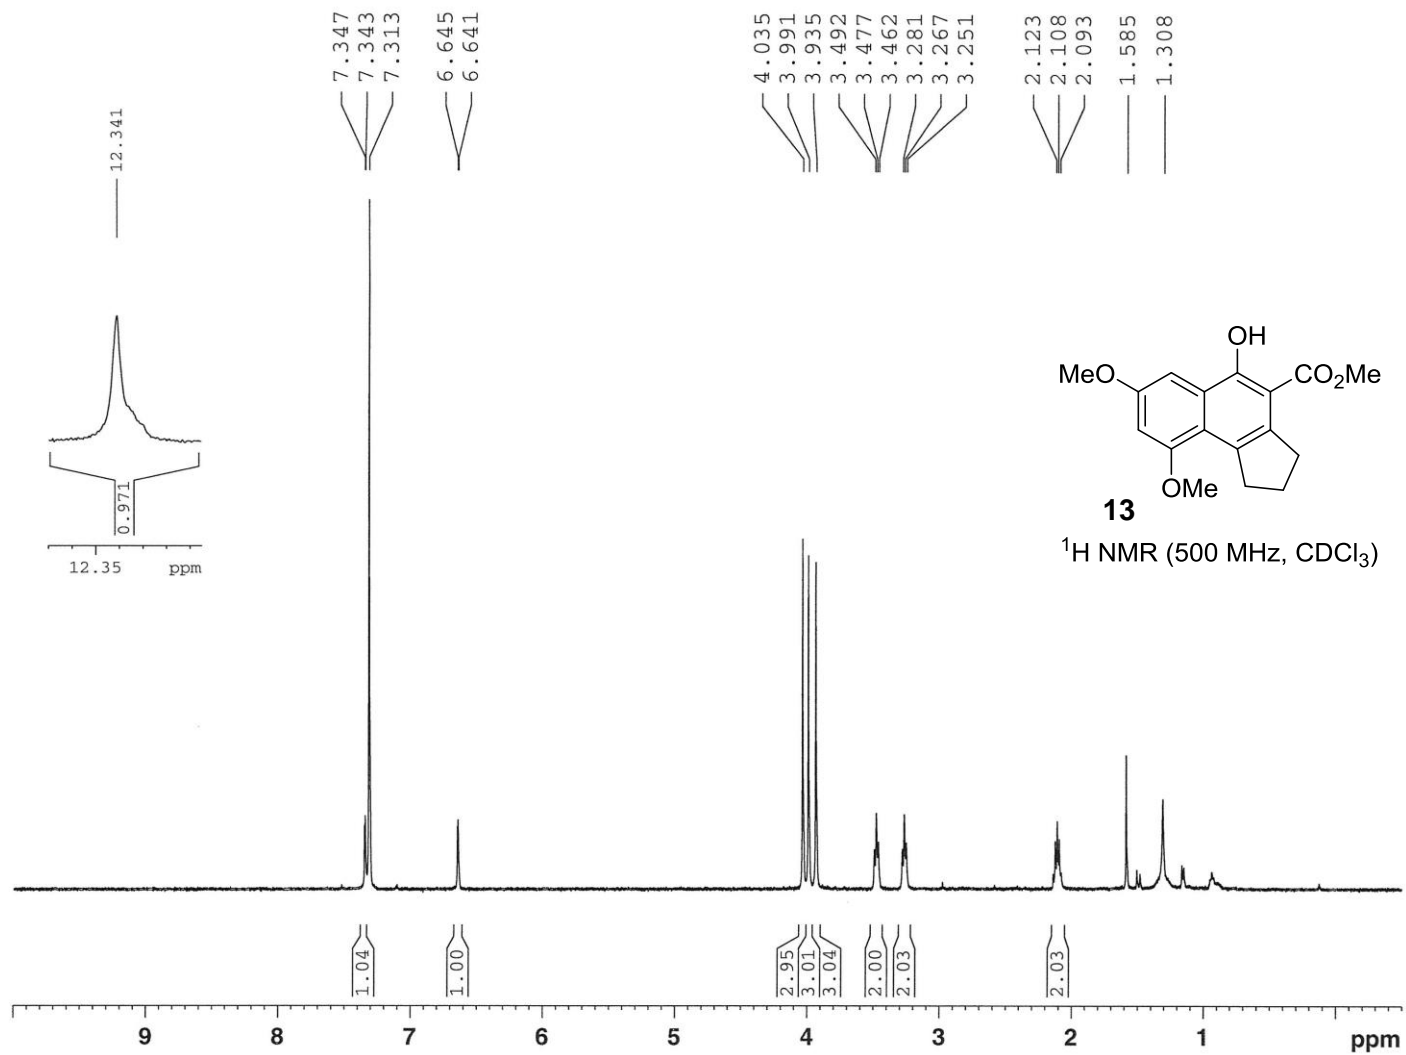

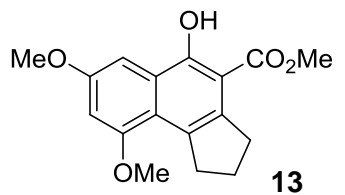

$^{13}\text{C}$  NMR (125 MHz,  $\text{CDCl}_3$ )

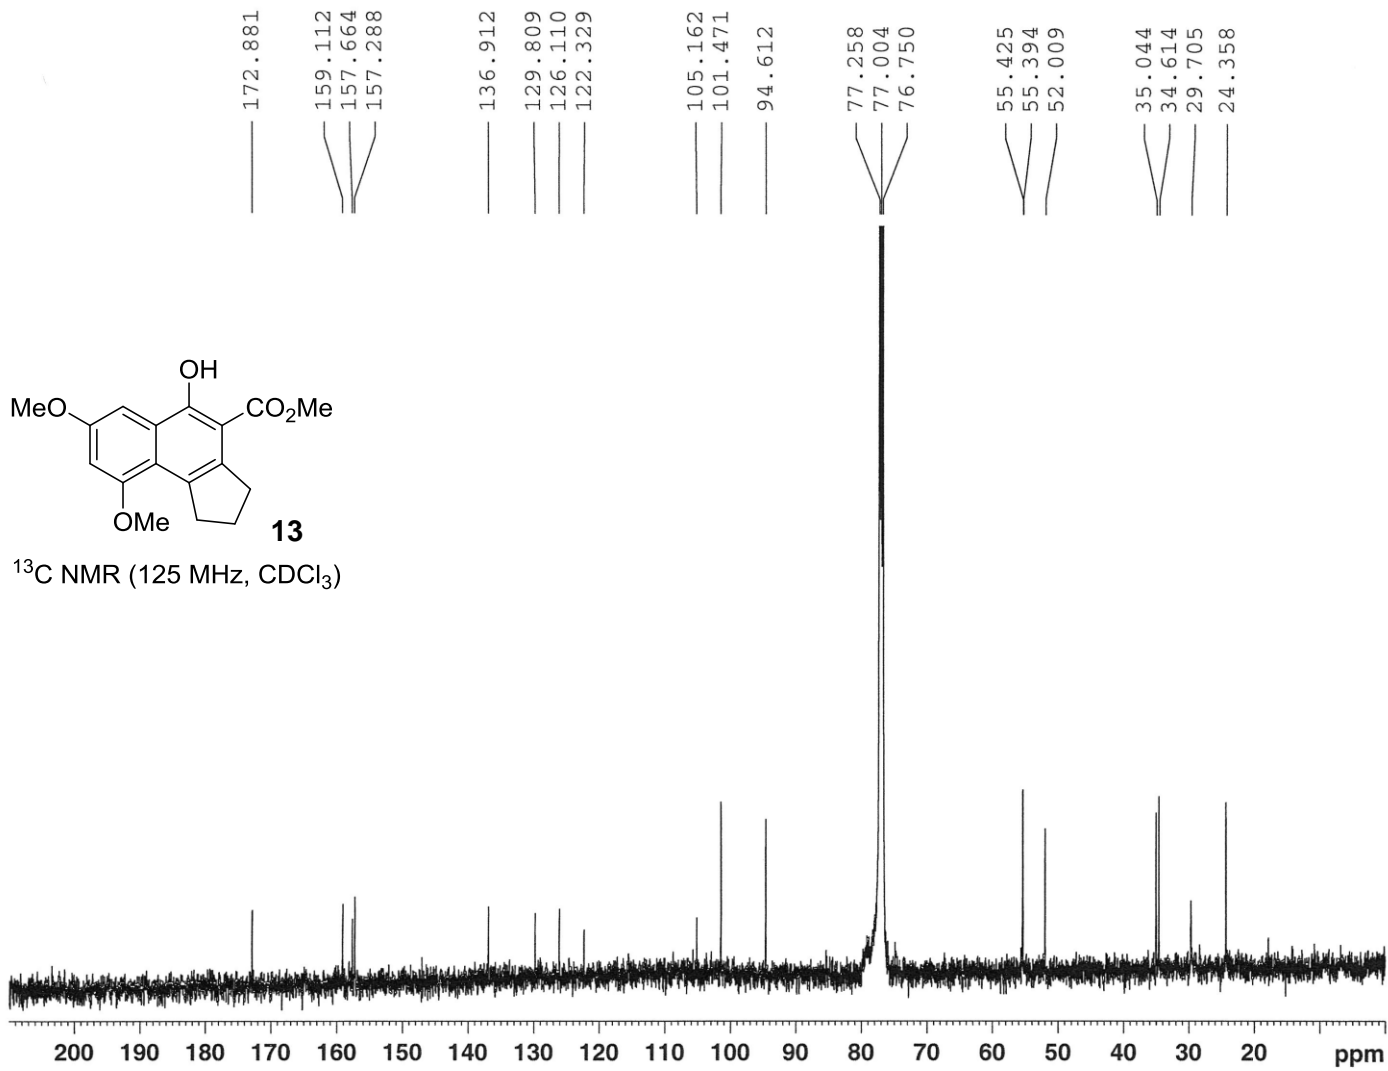

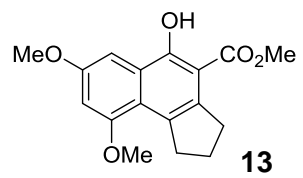

$^1\text{H}$ - $^1\text{H}$  2D COSY NMR  
500 MHz,  $\text{CDCl}_3$

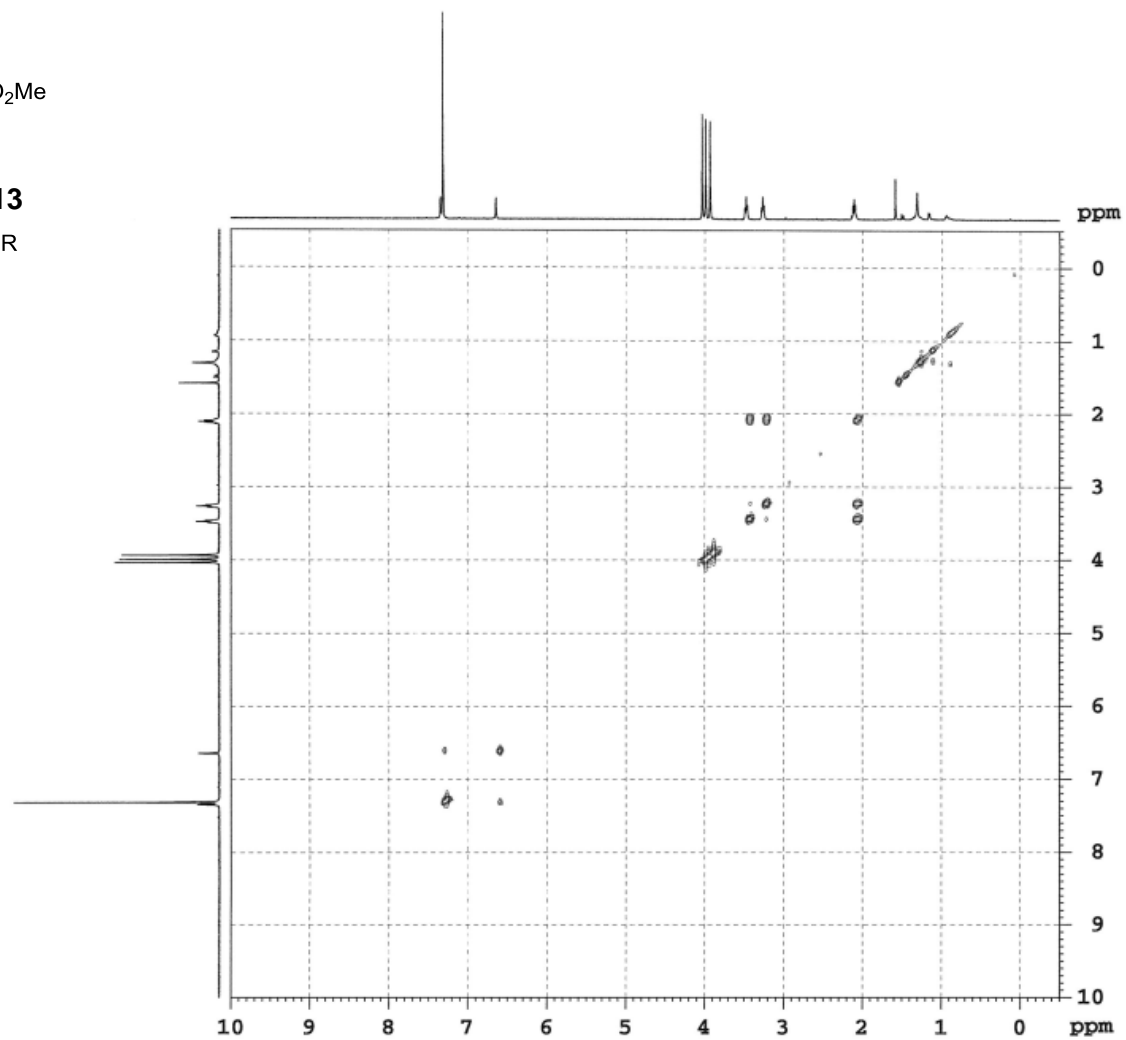

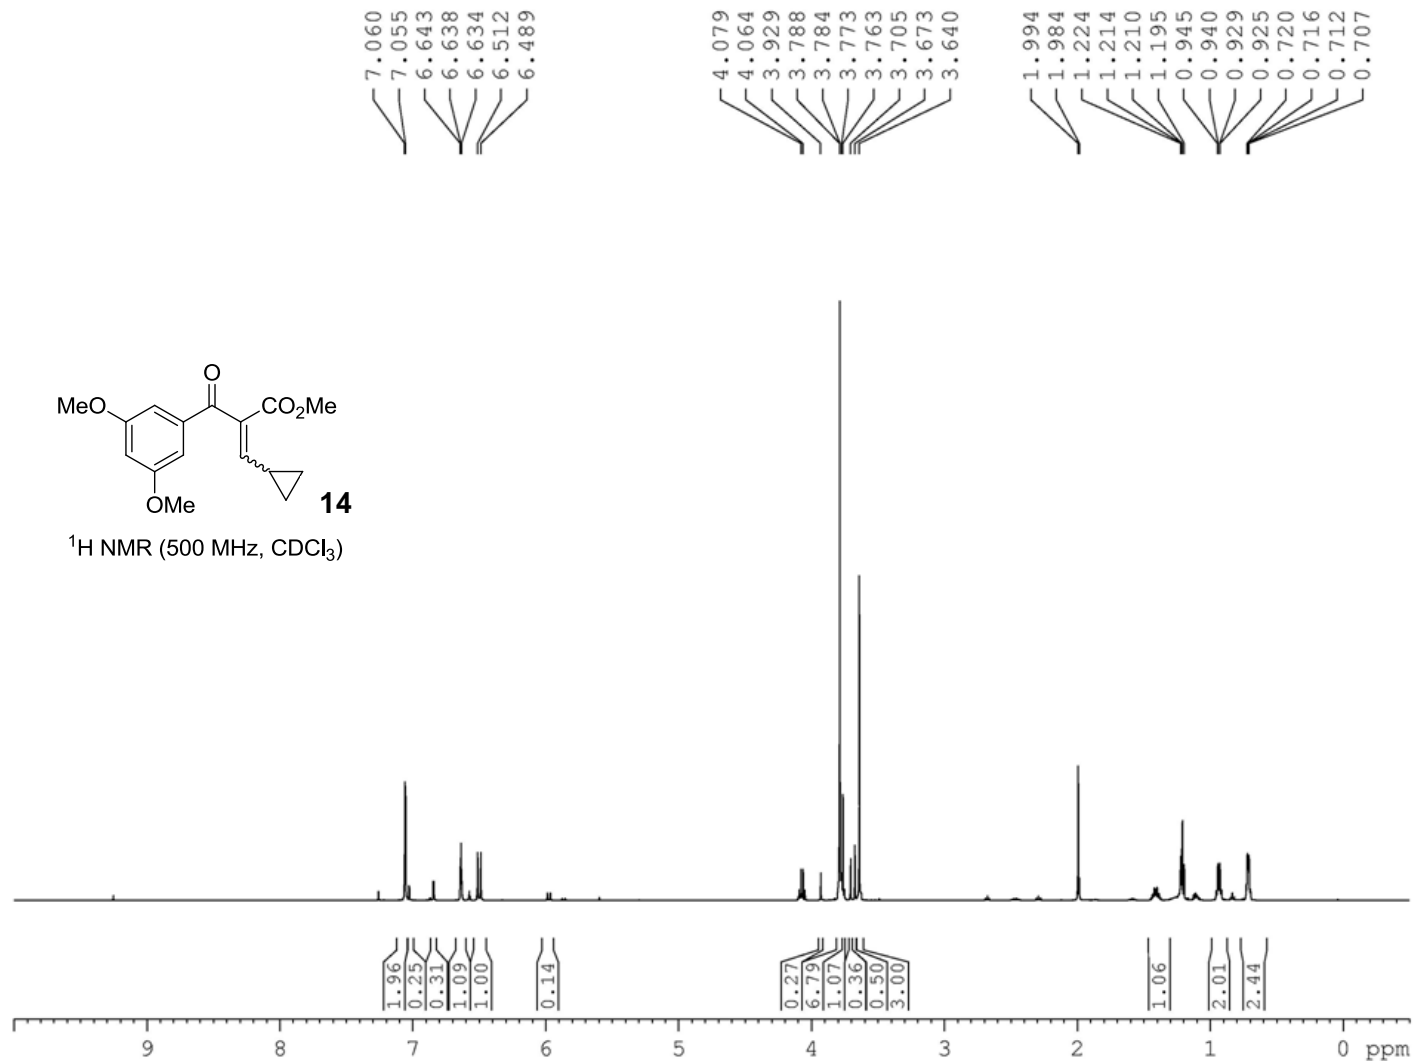

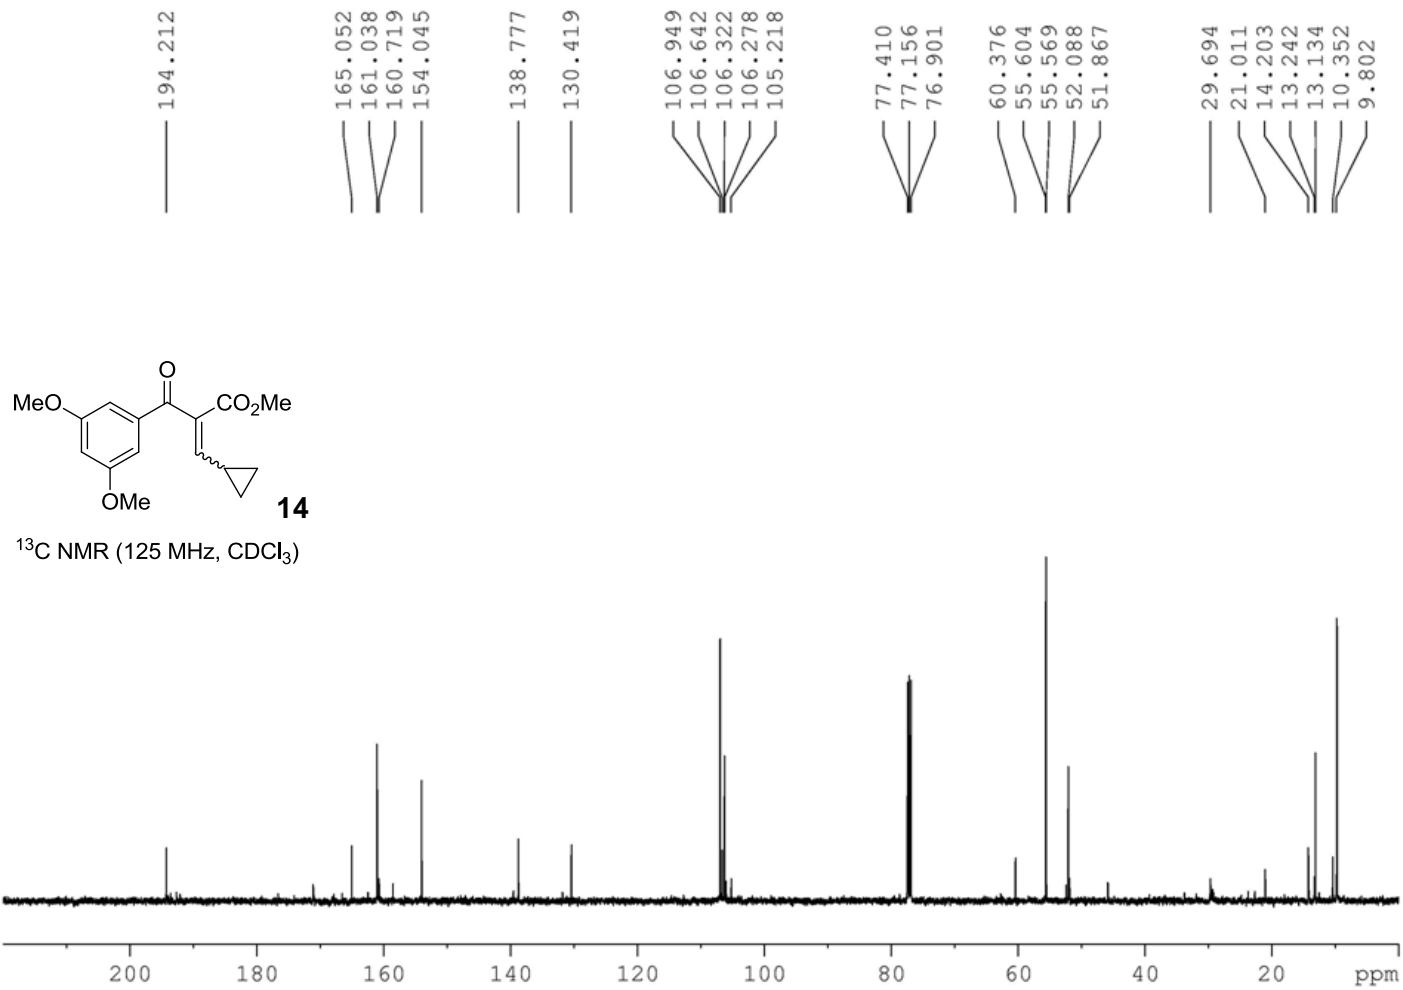

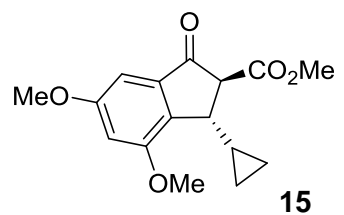

$^1\text{H NMR}$  (500 MHz,  $\text{CDCl}_3$ )

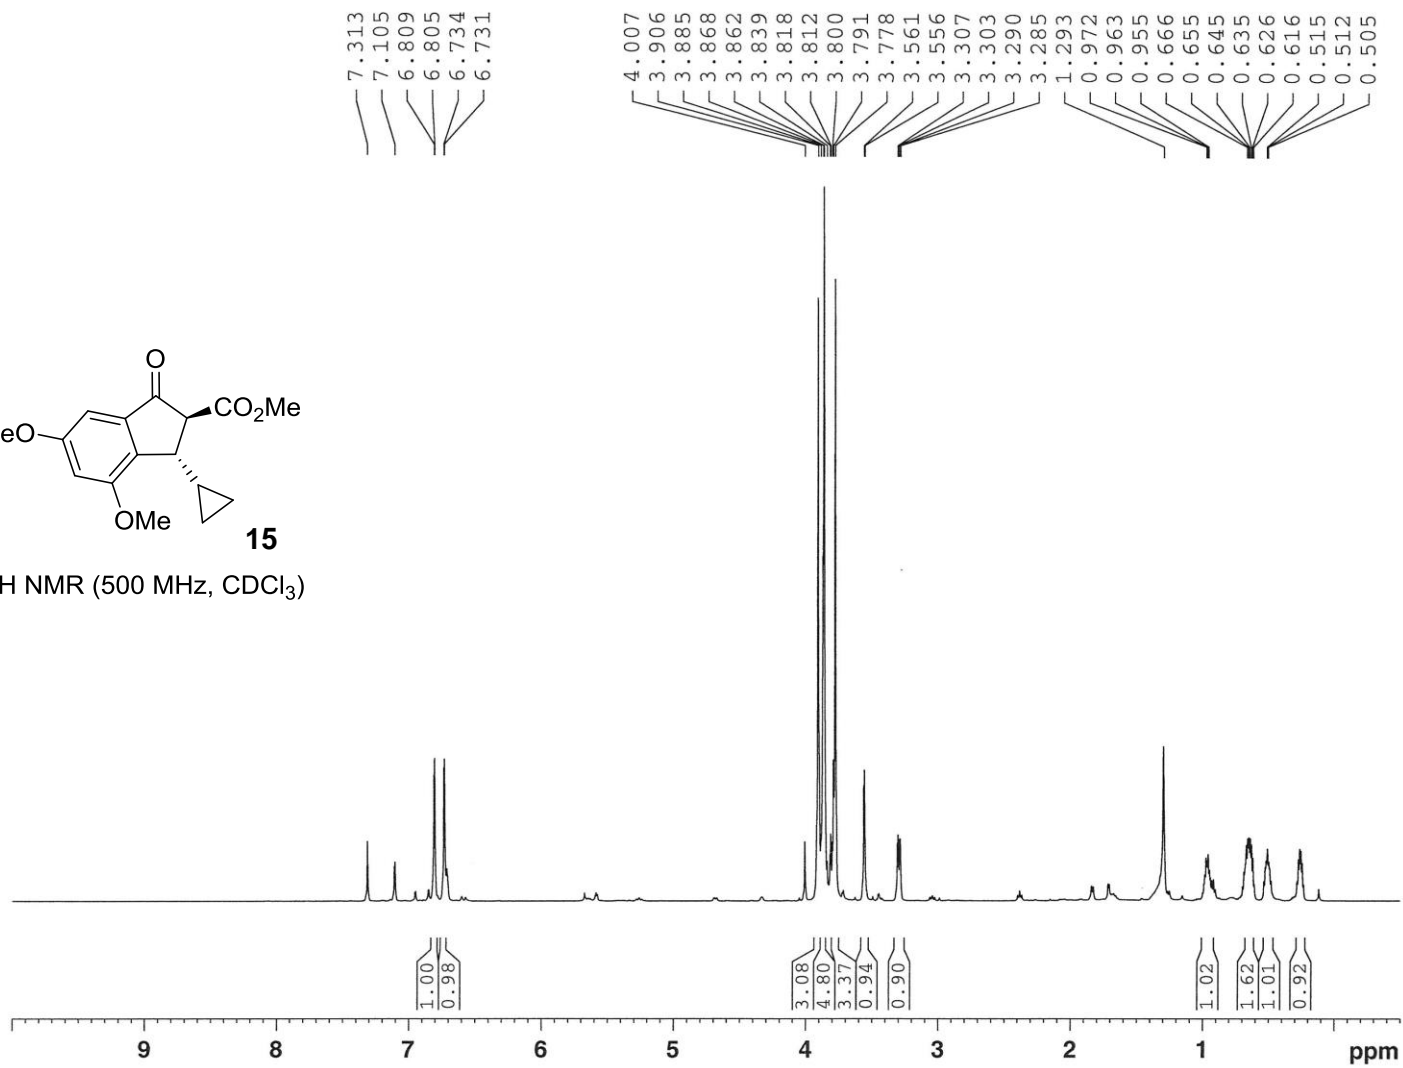

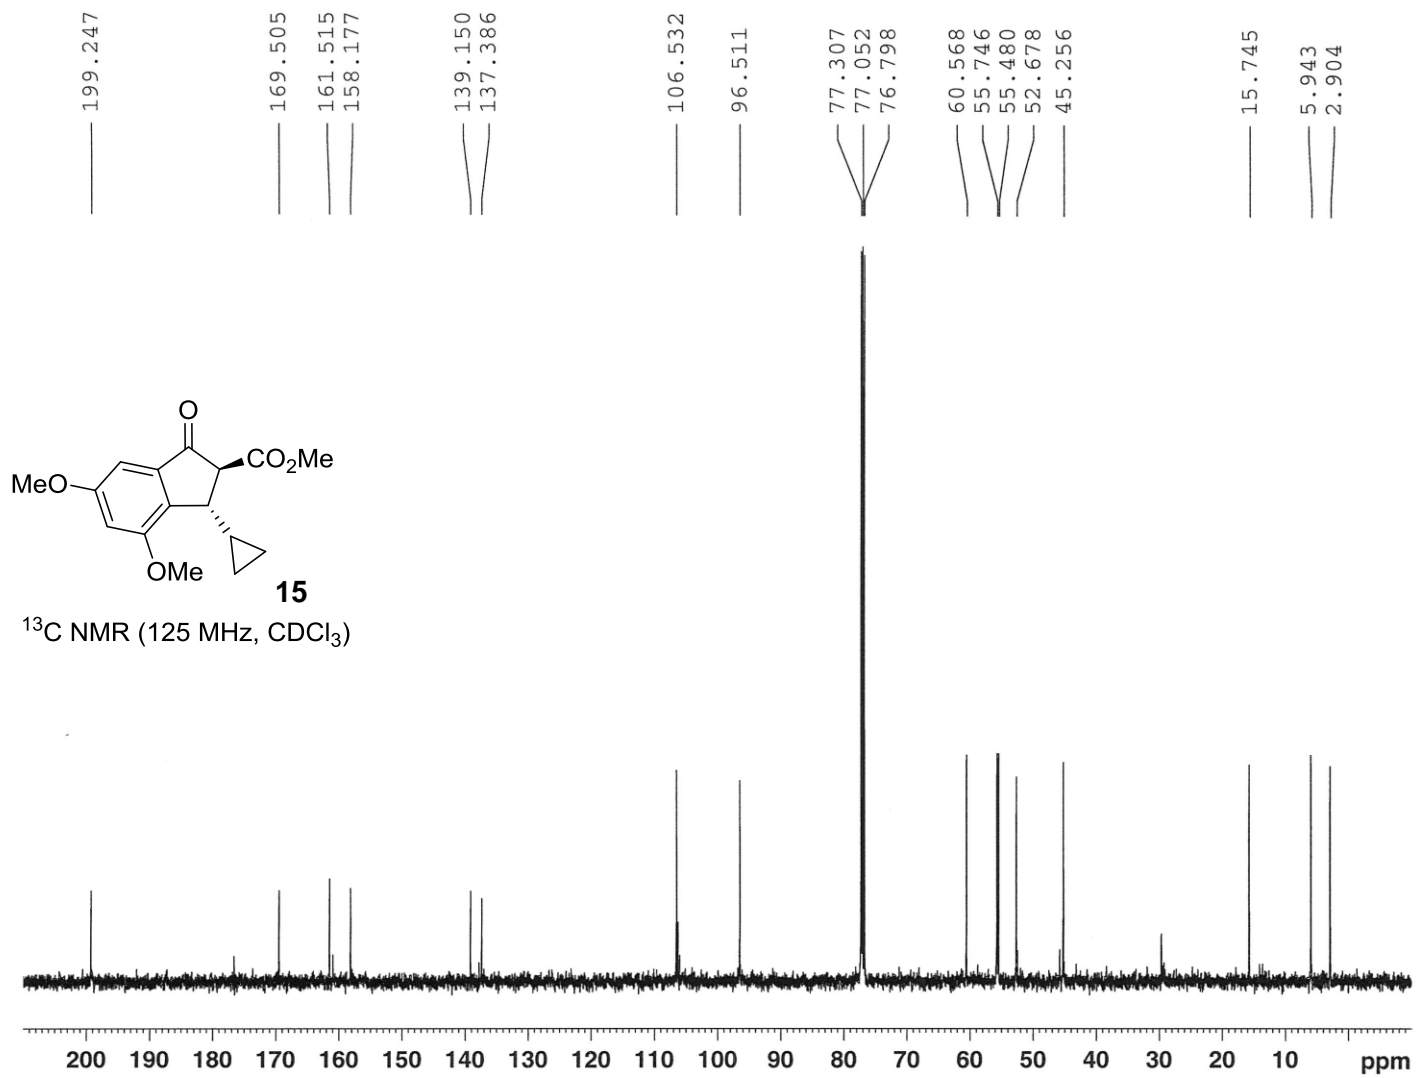



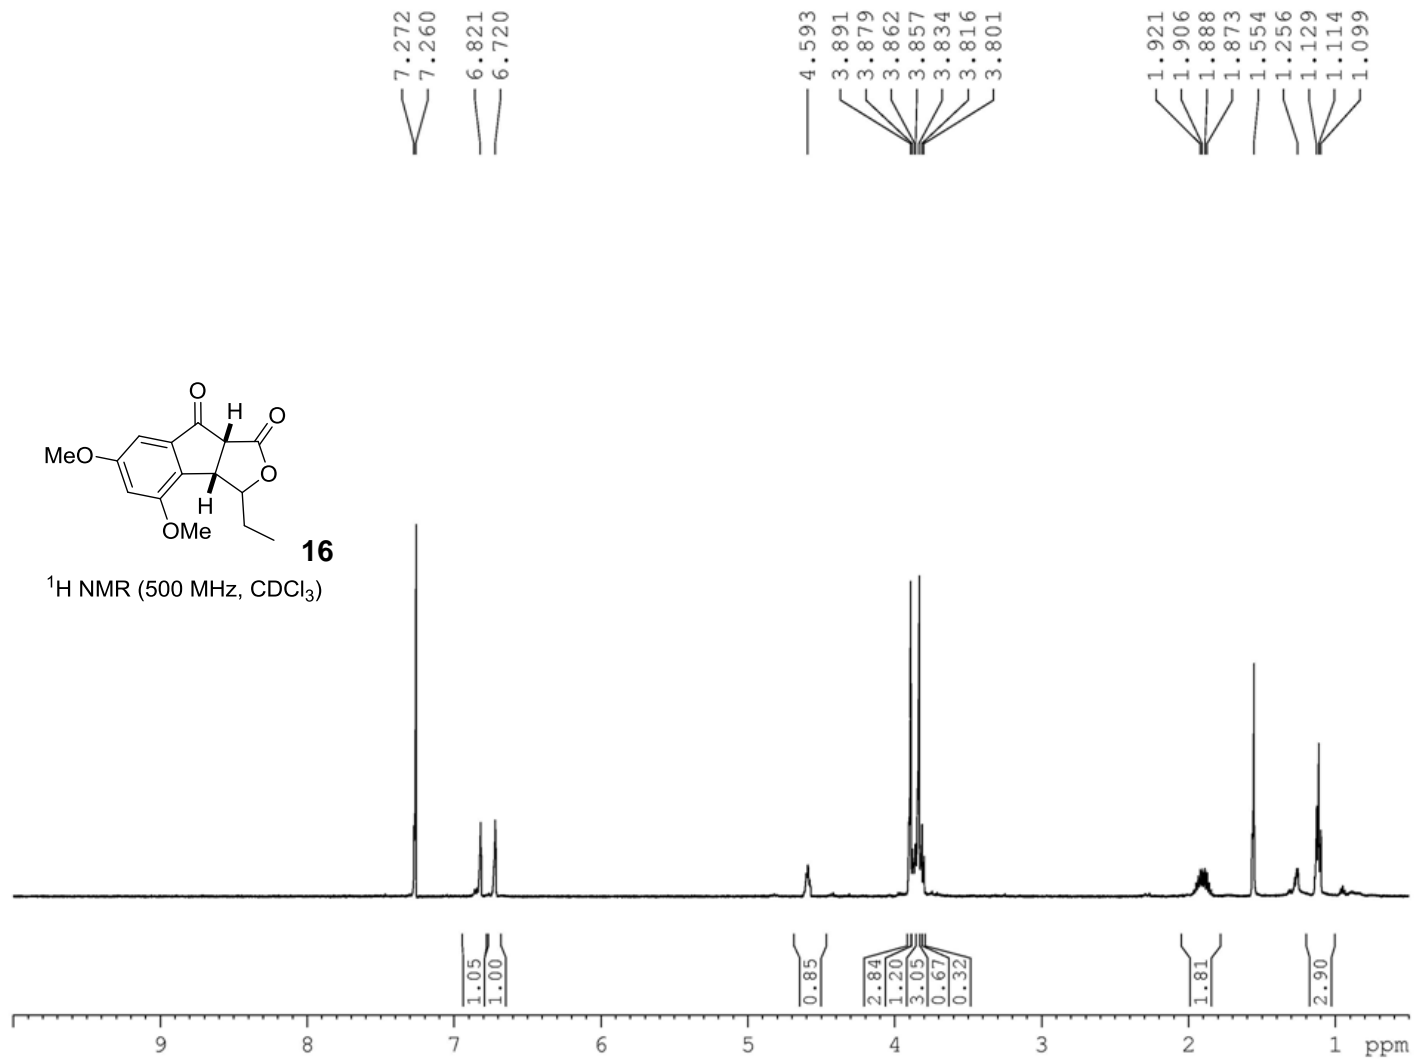

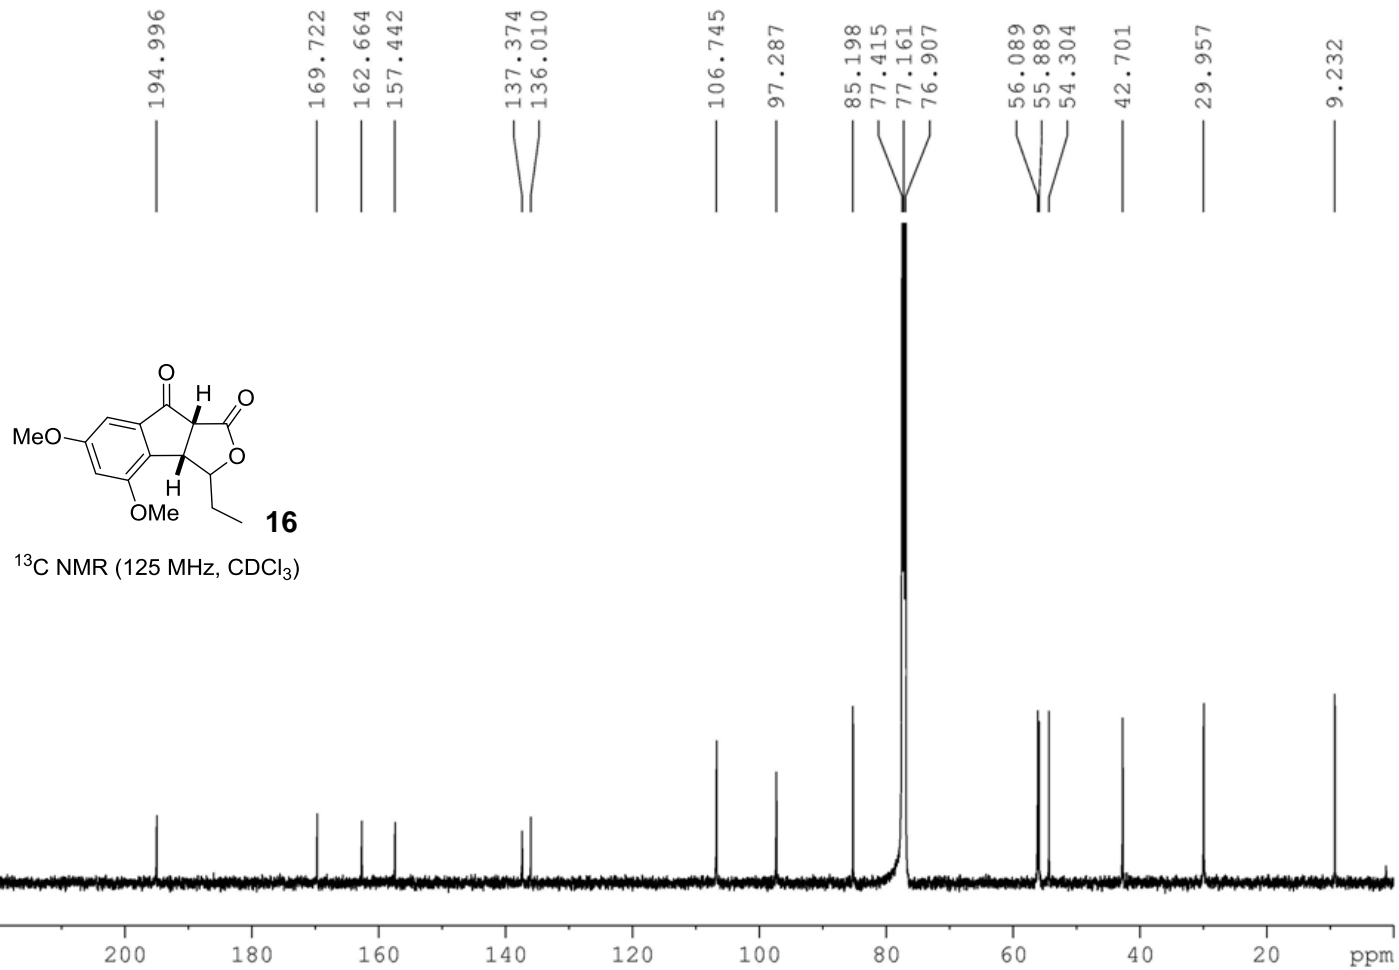

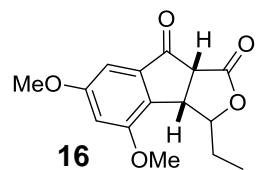

$^1\text{H}$ - $^1\text{H}$  2D COSY NMR  
(500 MHz,  $\text{CDCl}_3$ )

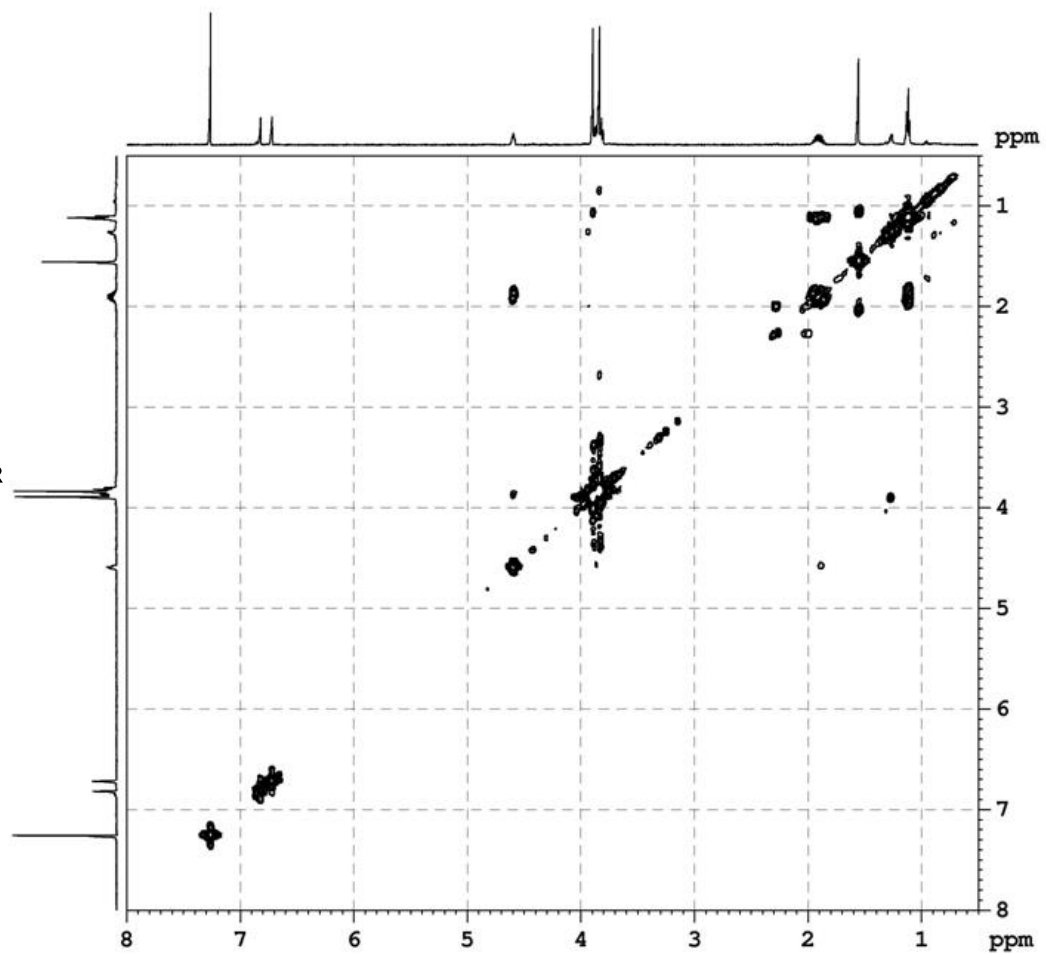

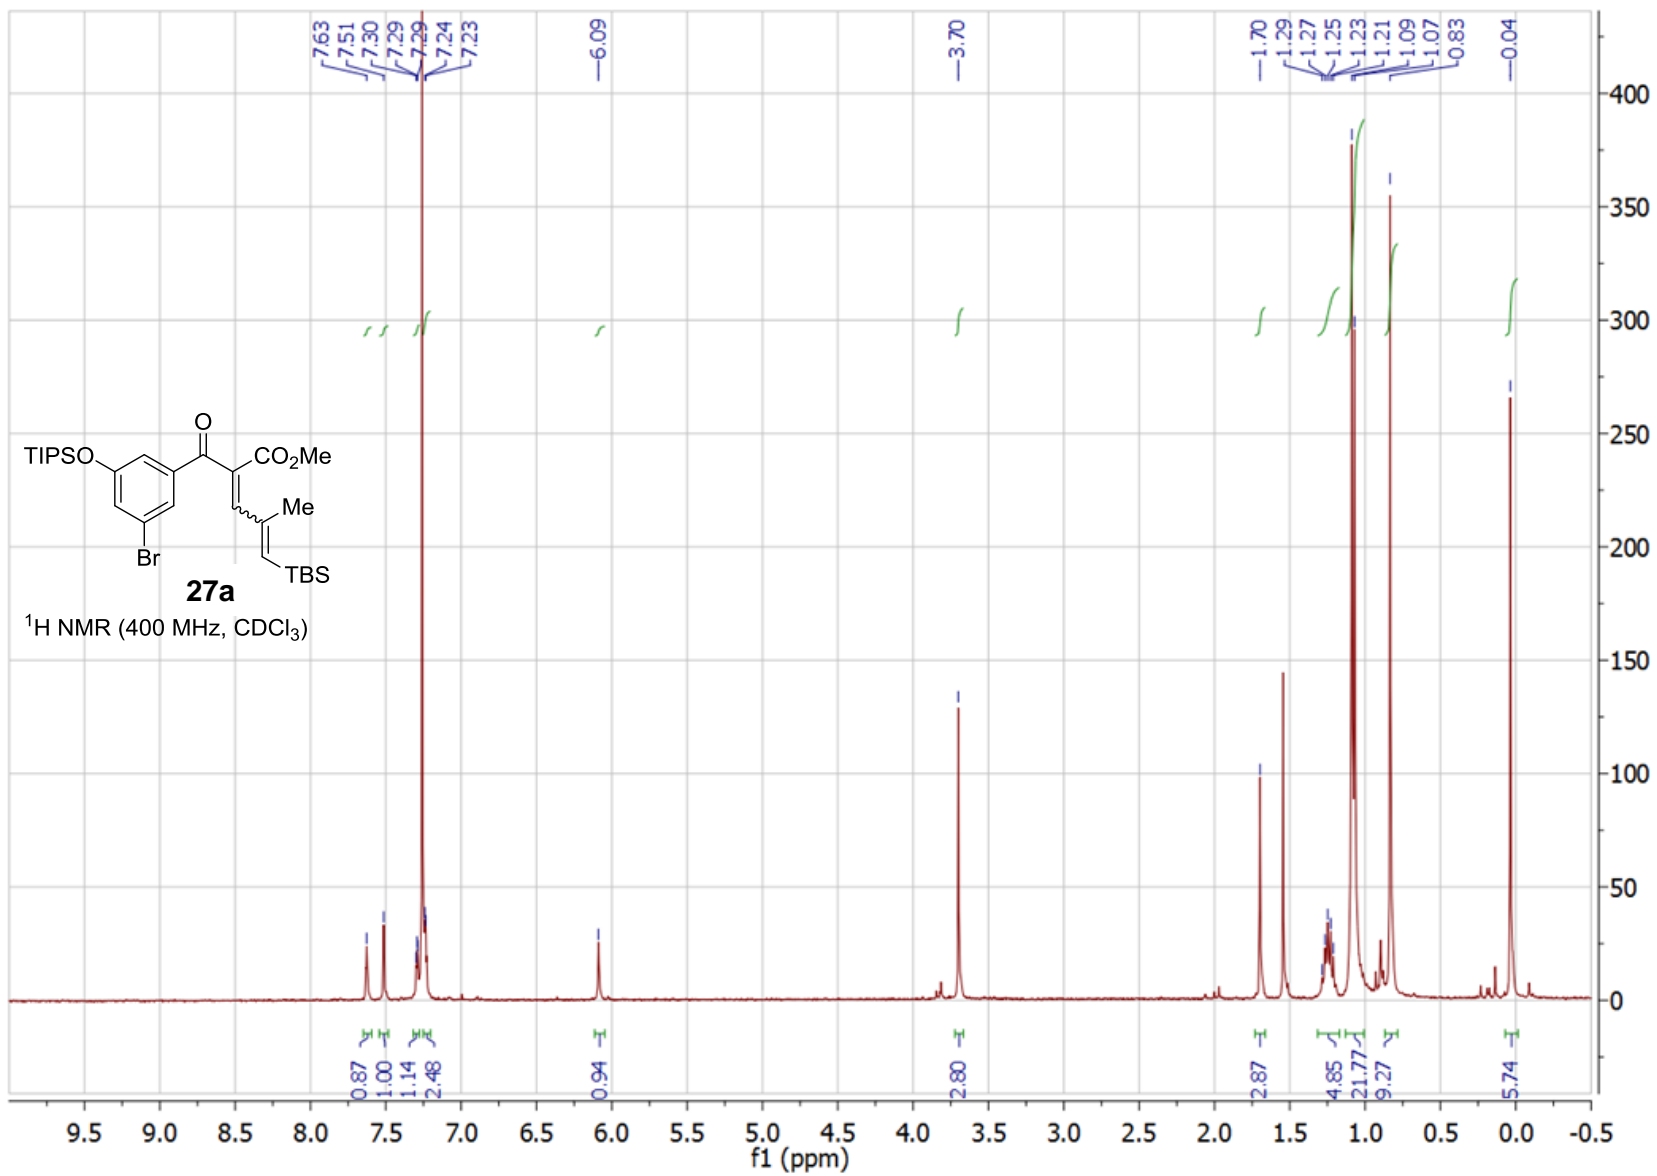

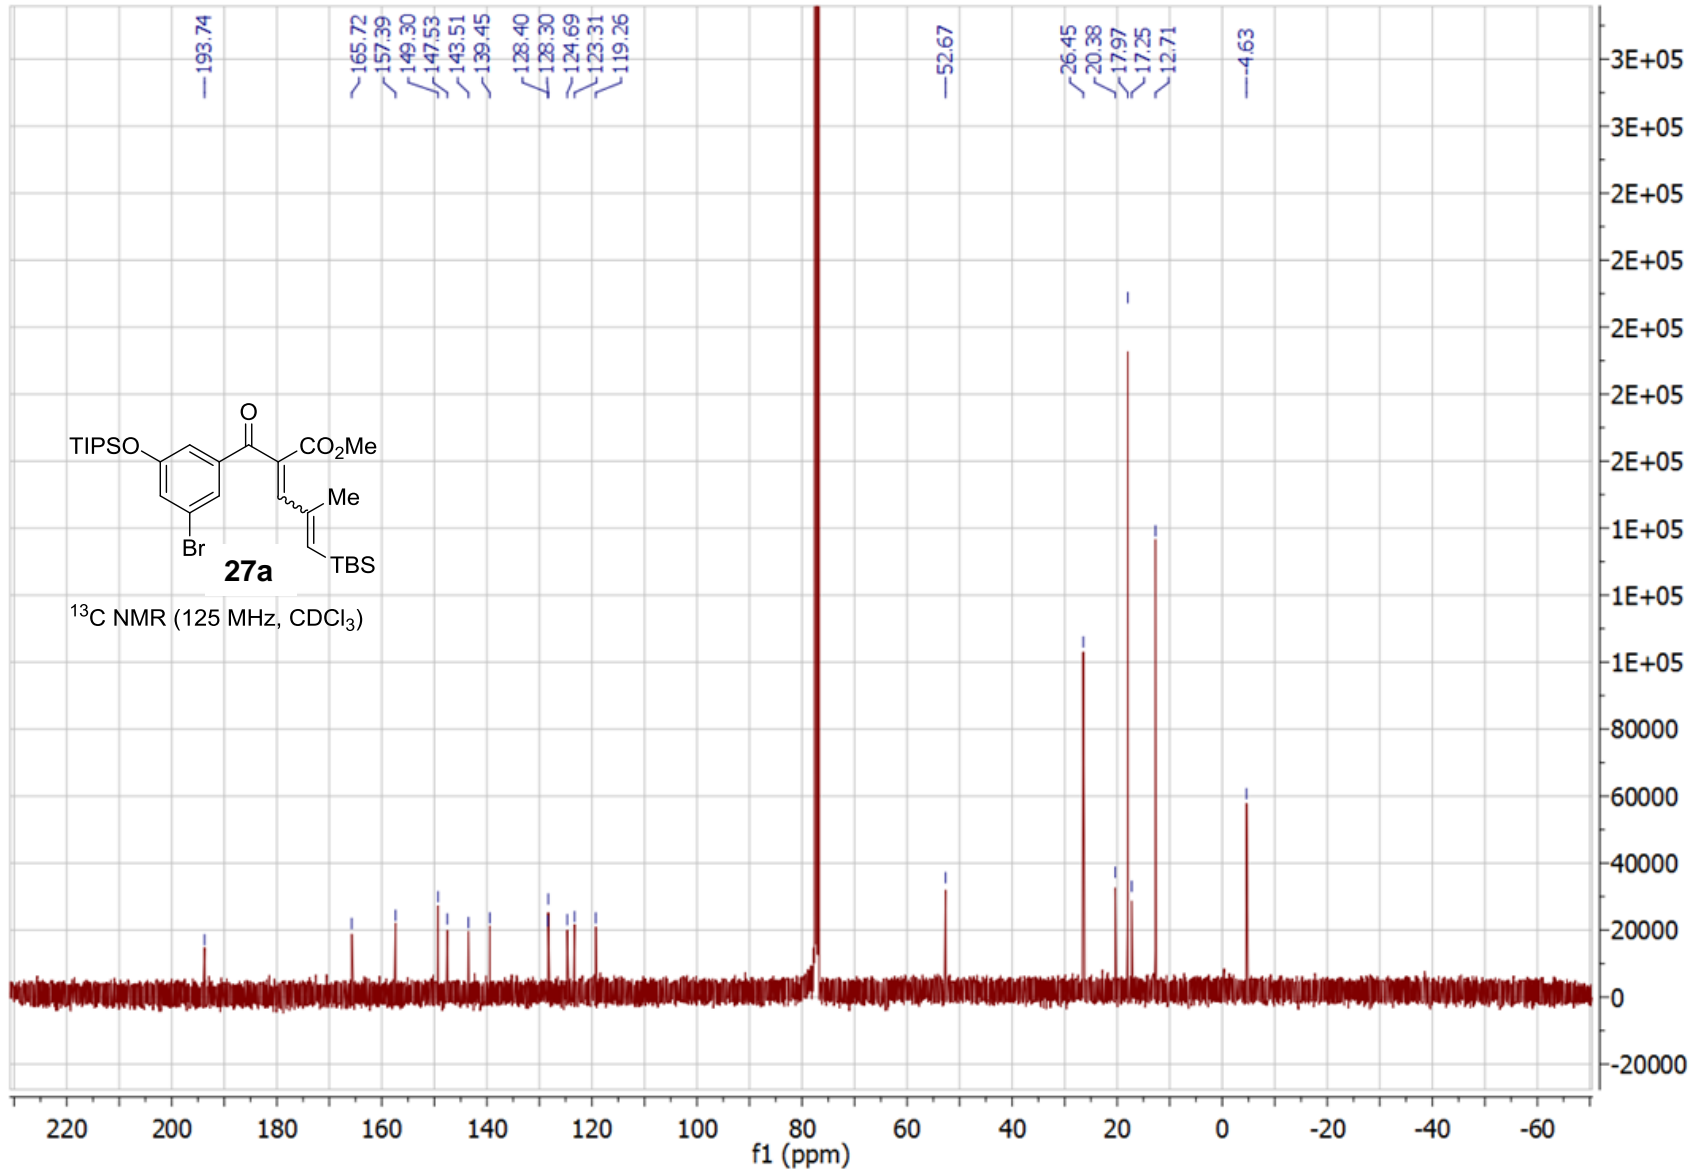





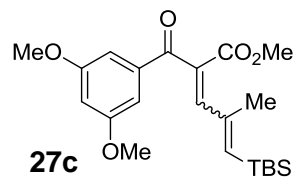

<sup>1</sup>H NMR (500 MHz, CDCl<sub>3</sub>)

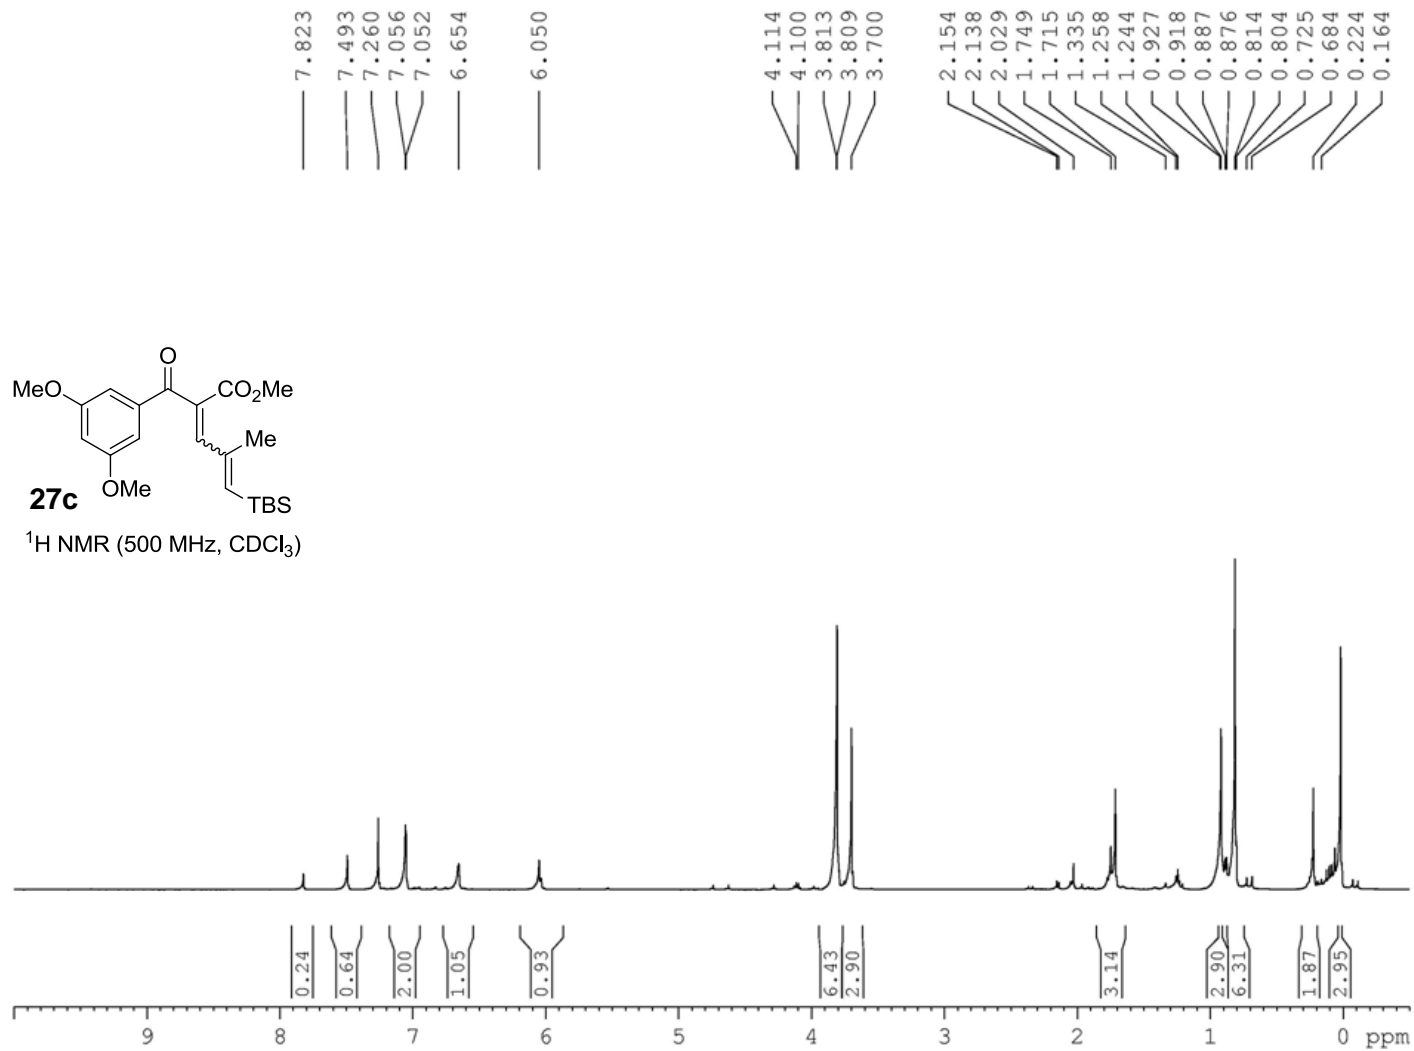



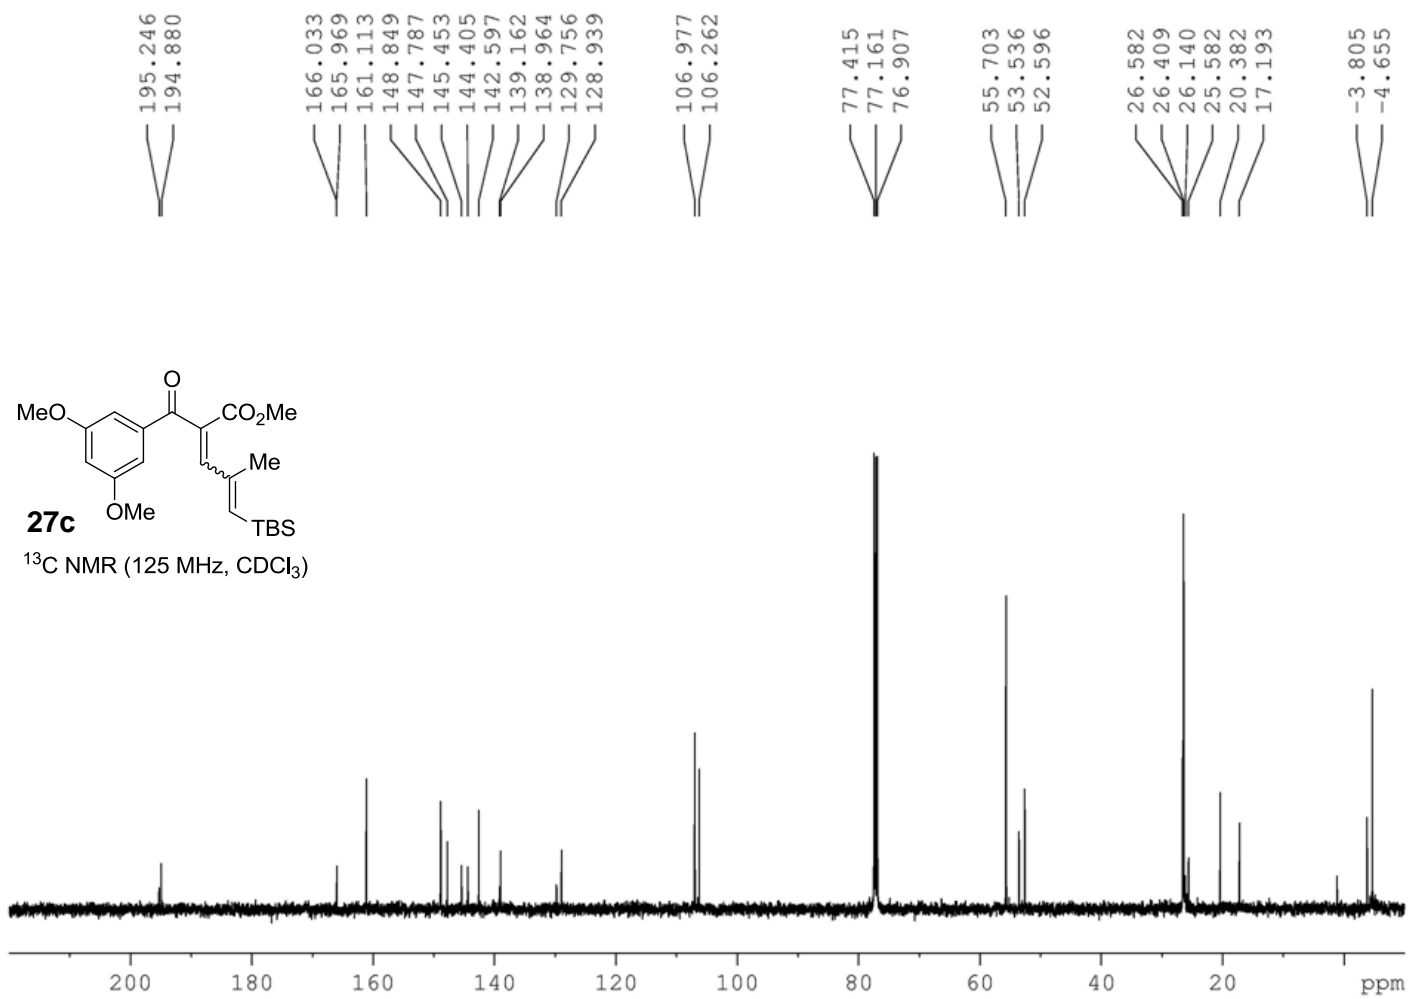

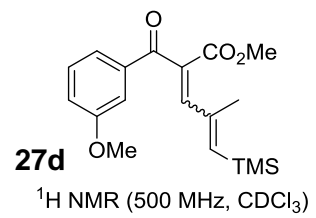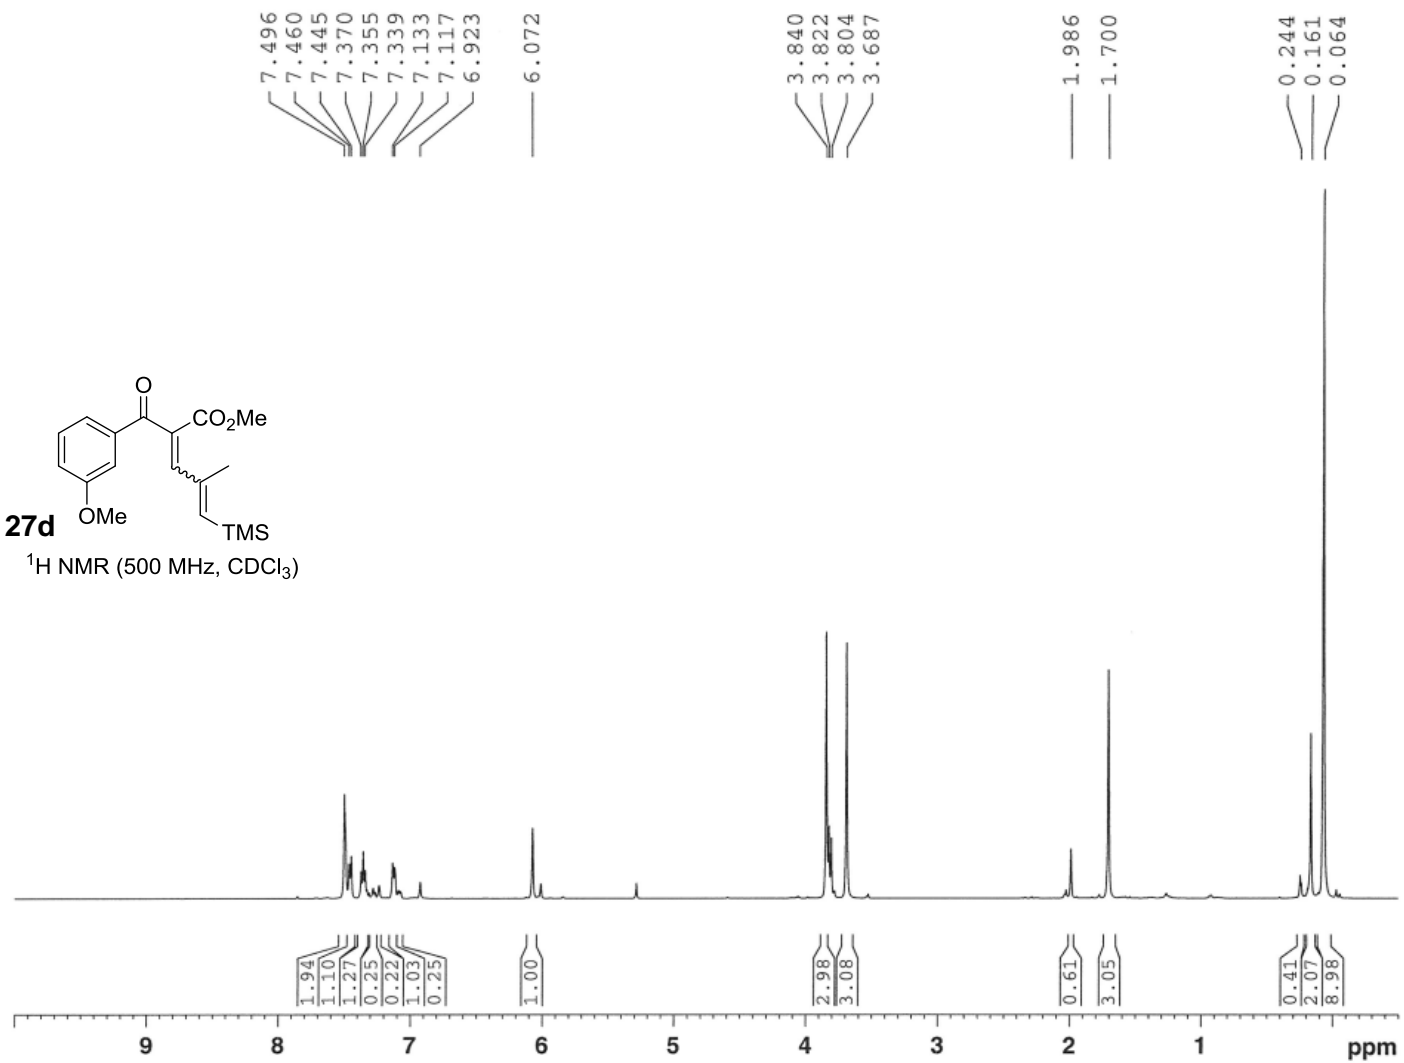

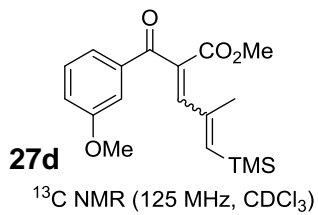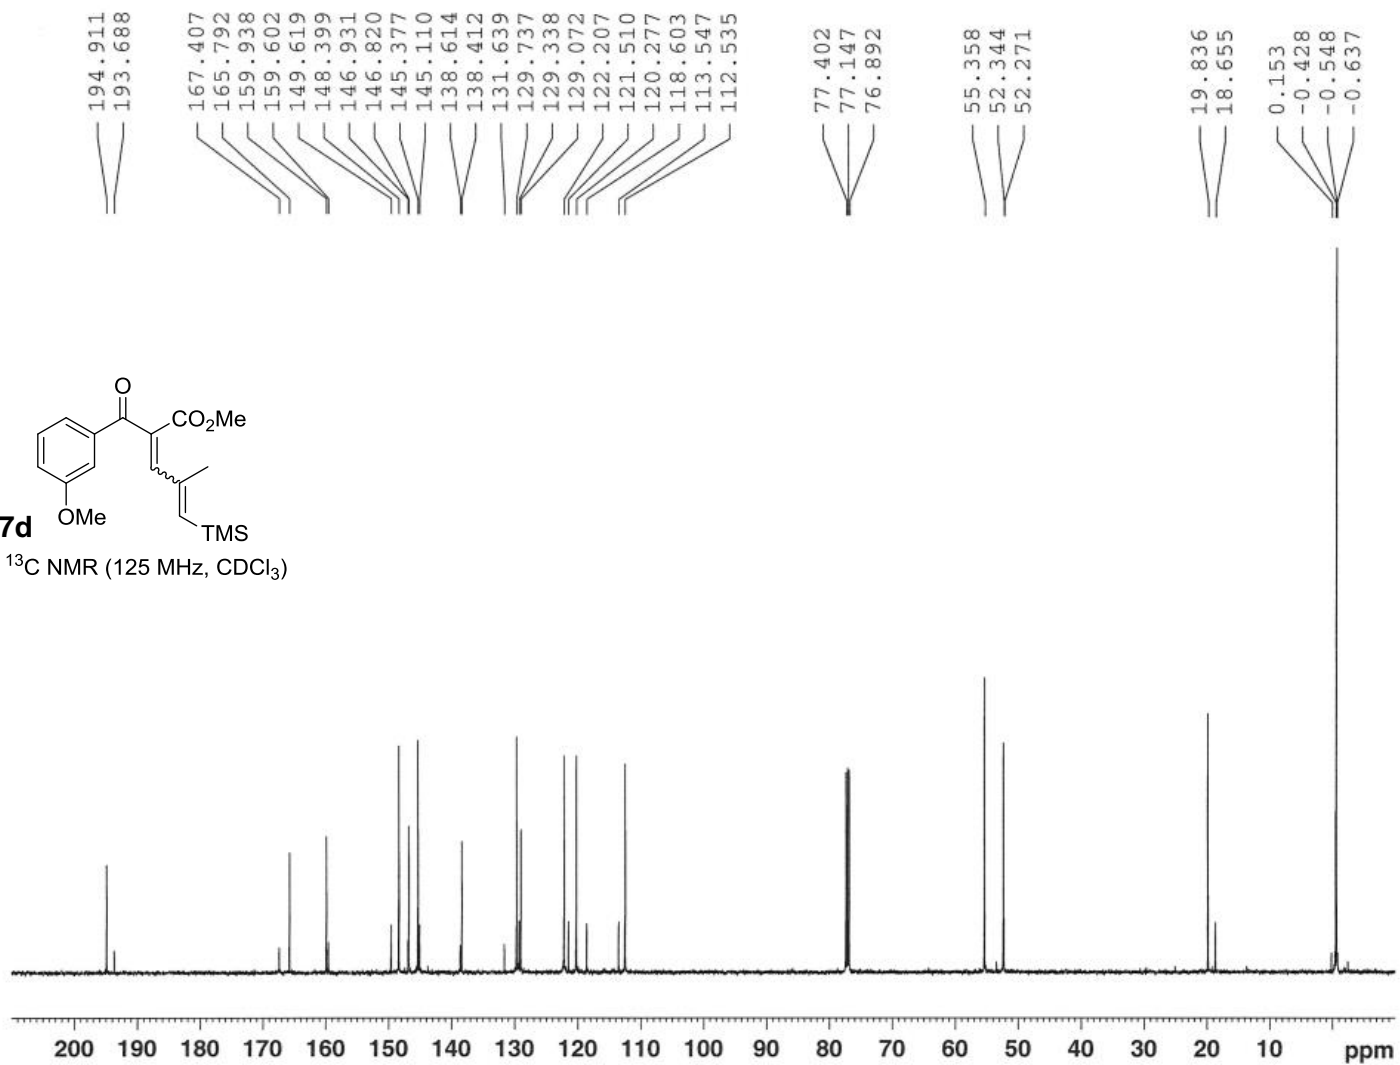

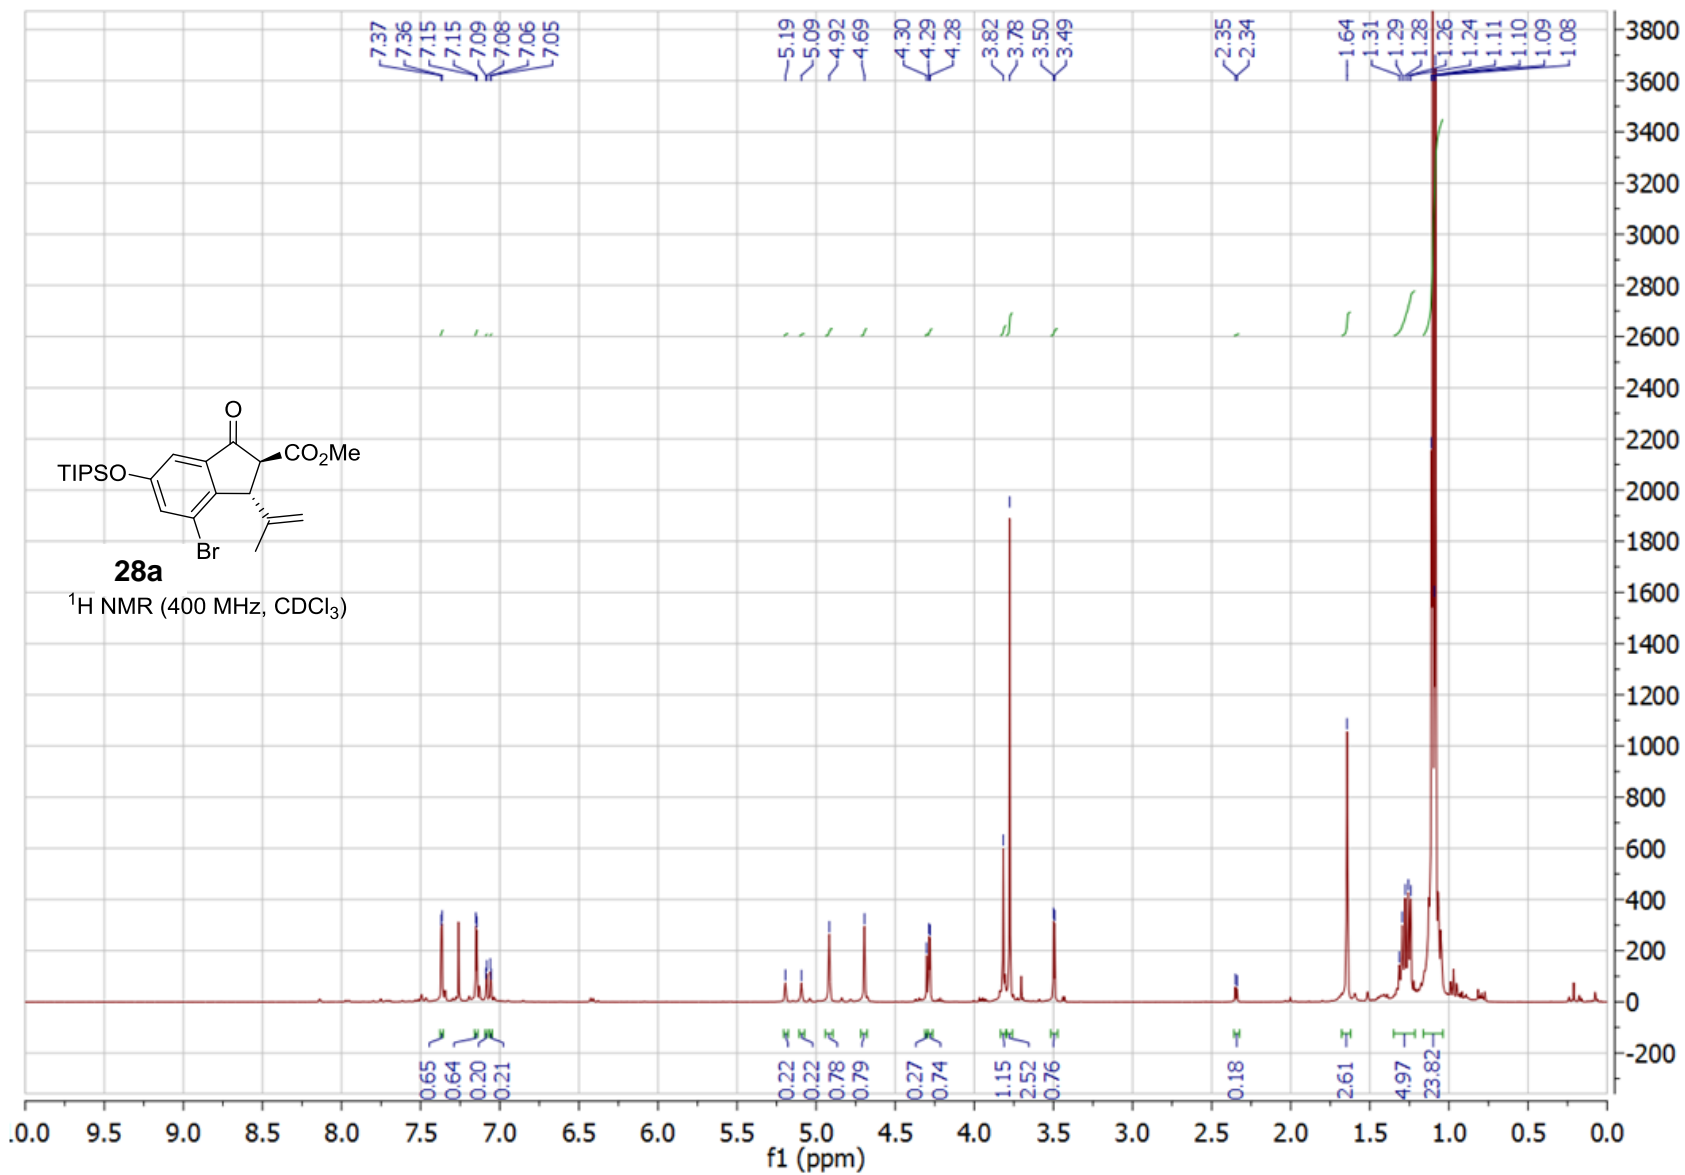

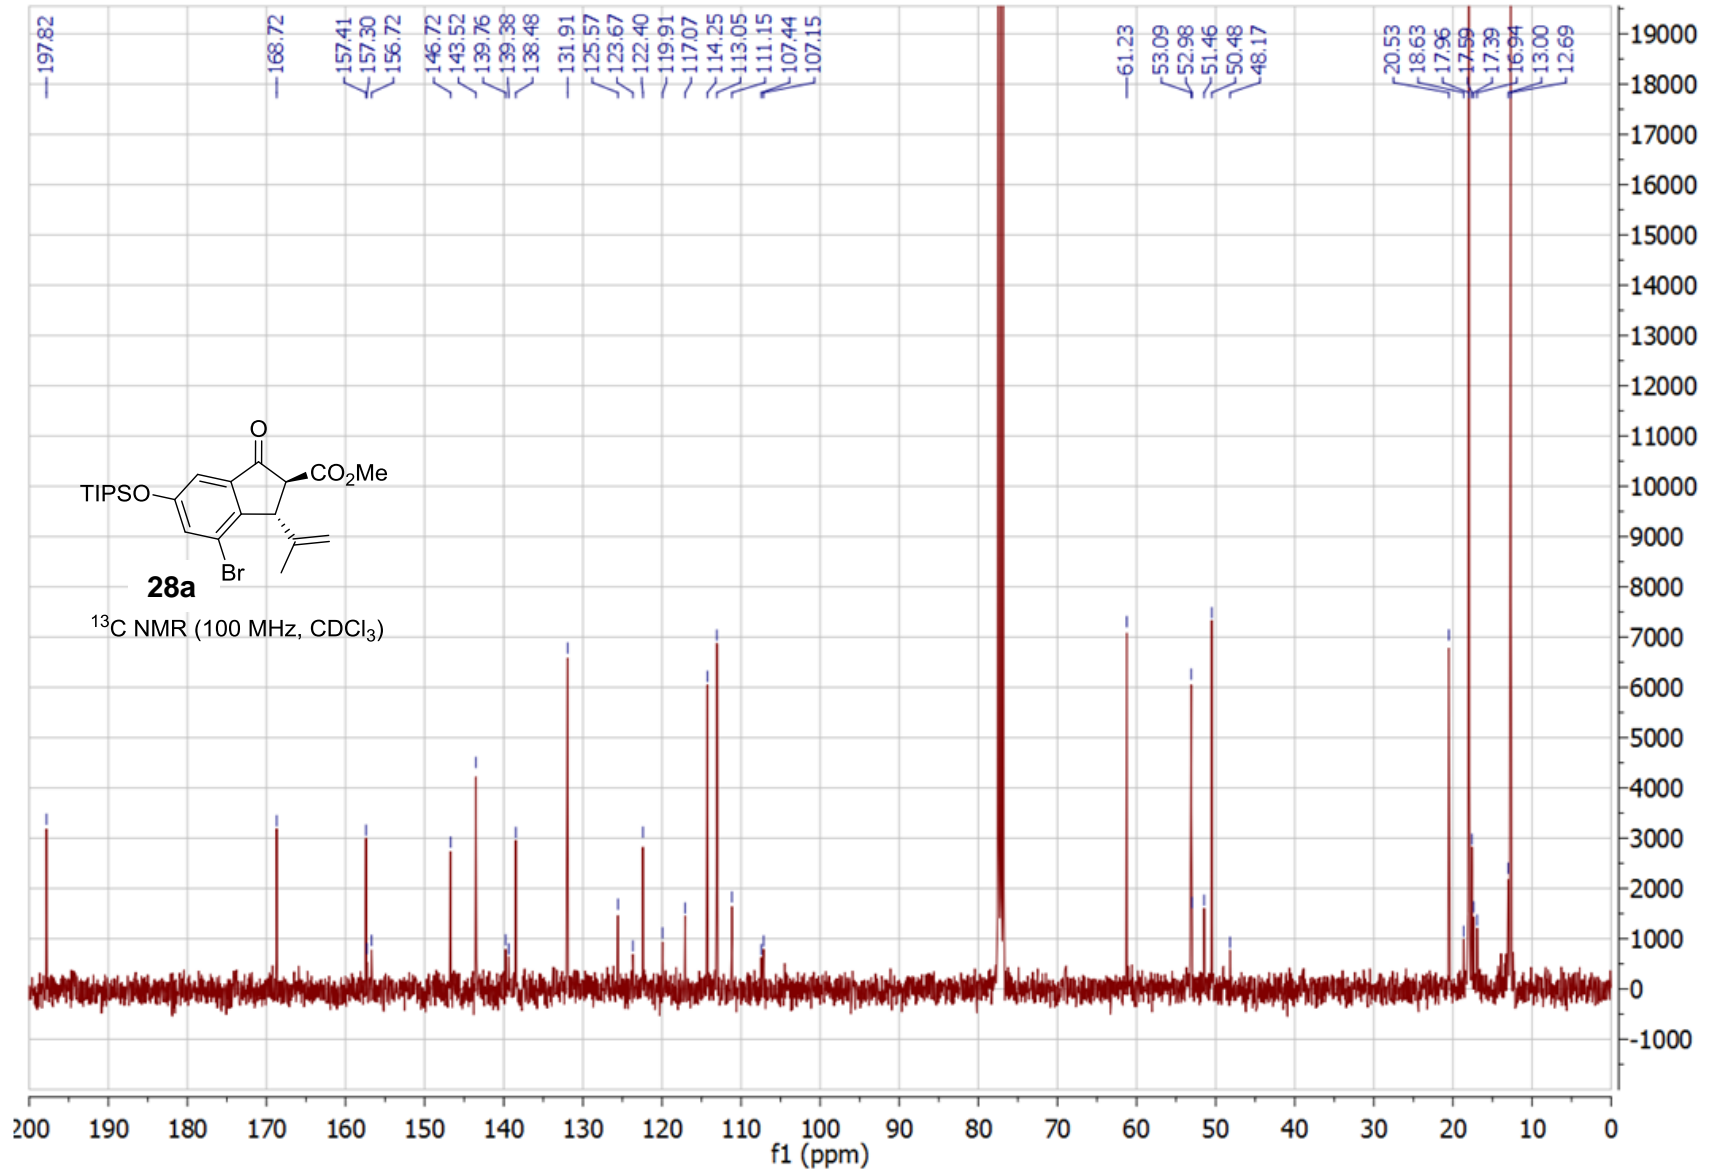

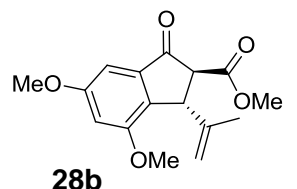

<sup>1</sup>H NMR (500 MHz, CDCl<sub>3</sub>)

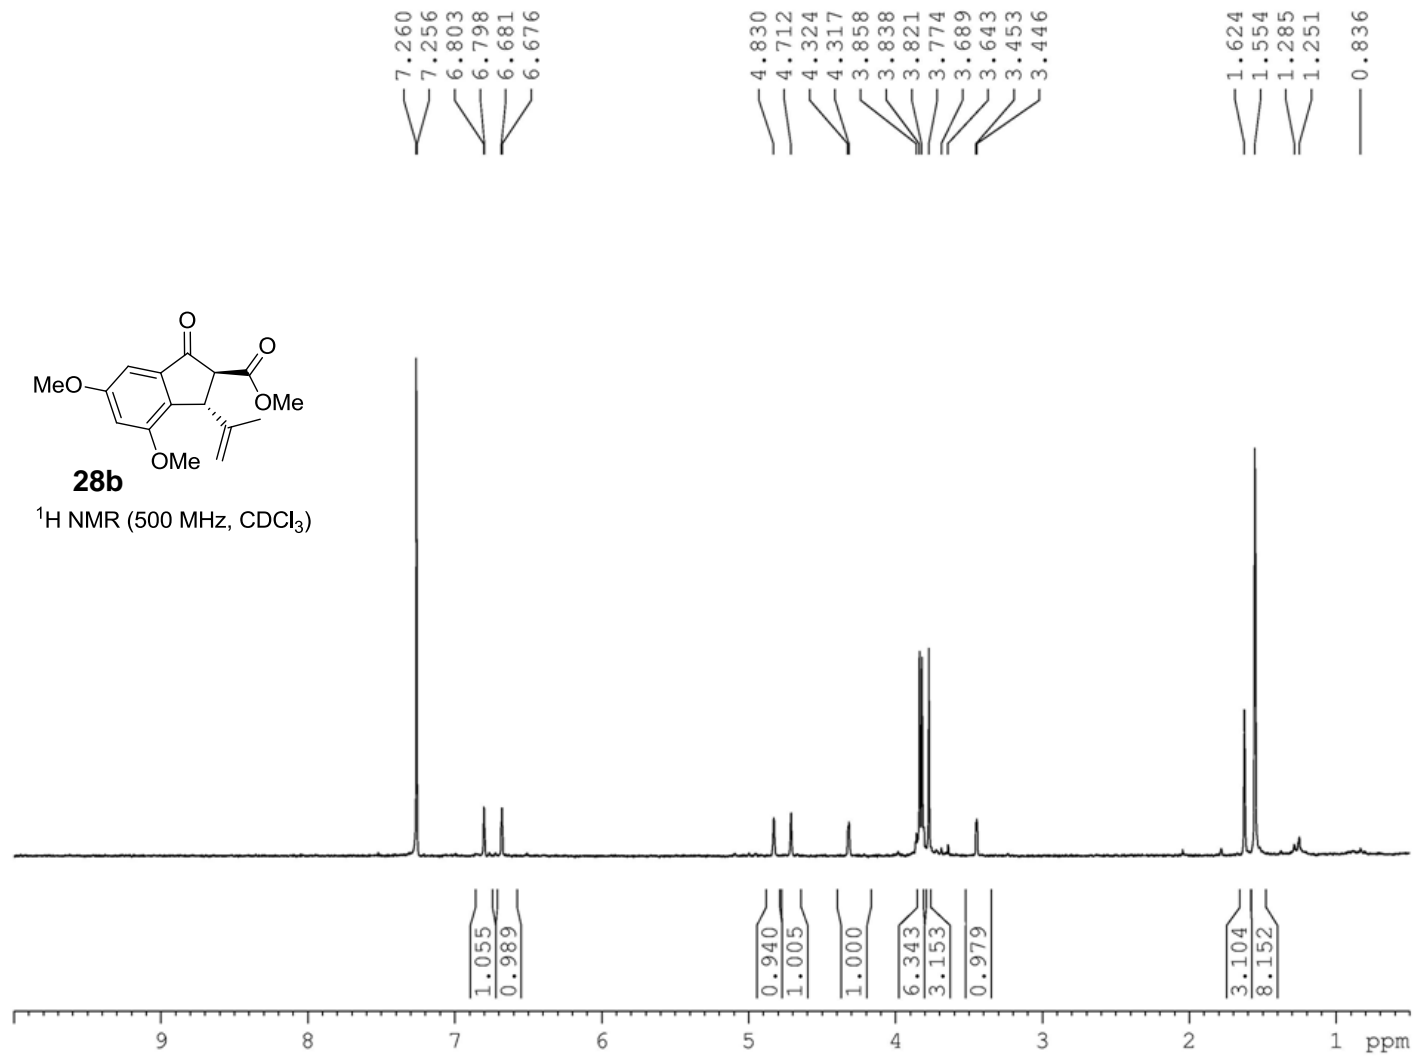

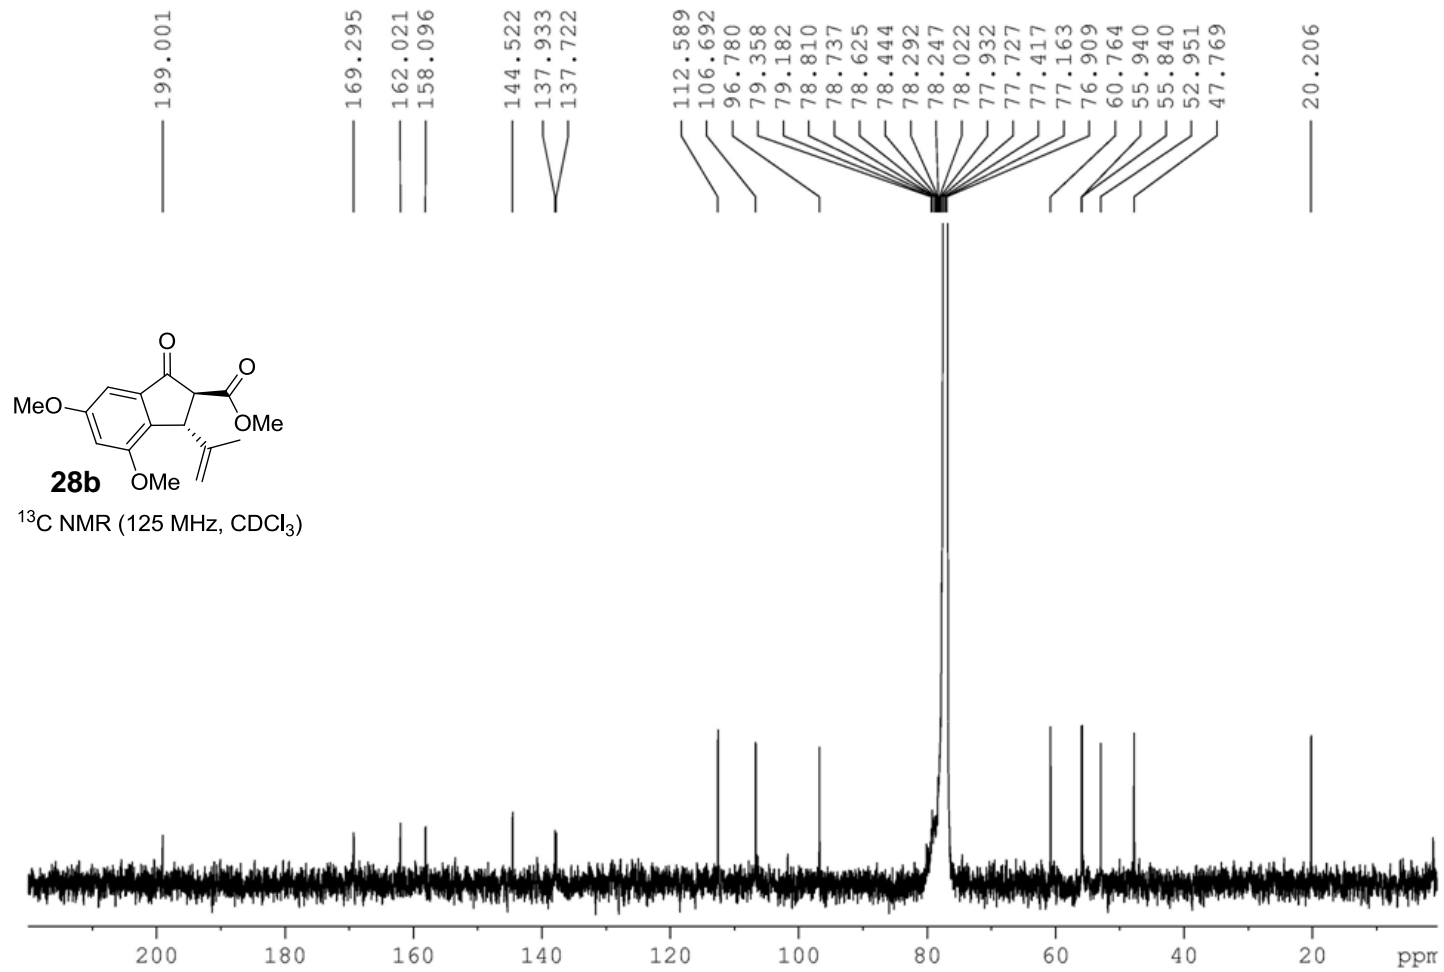

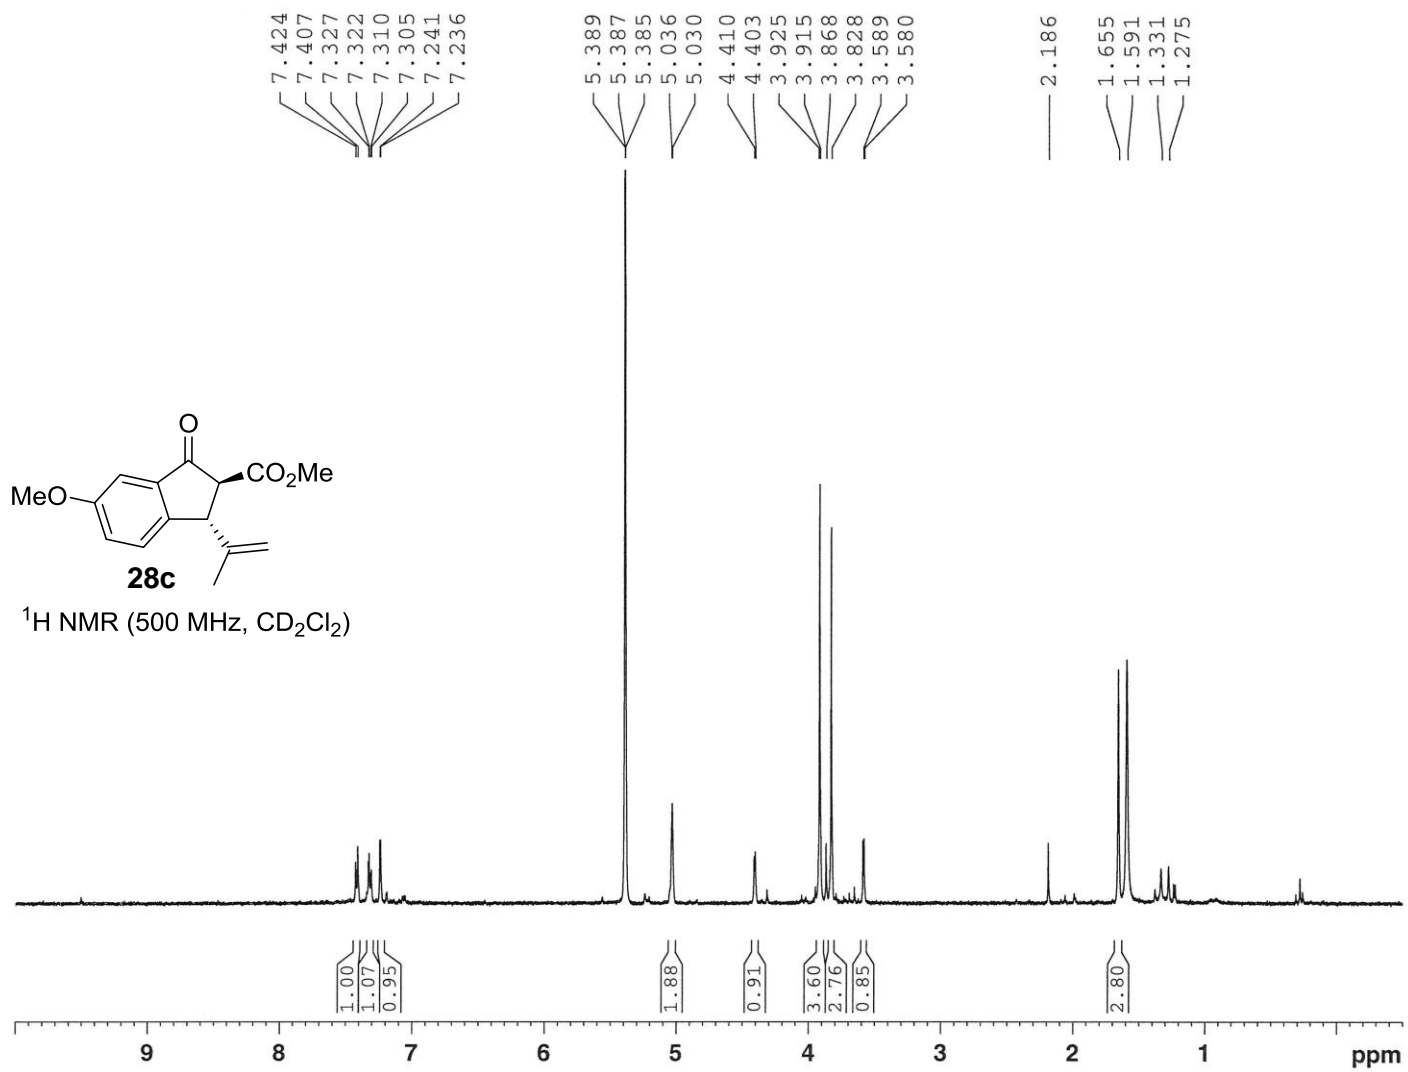



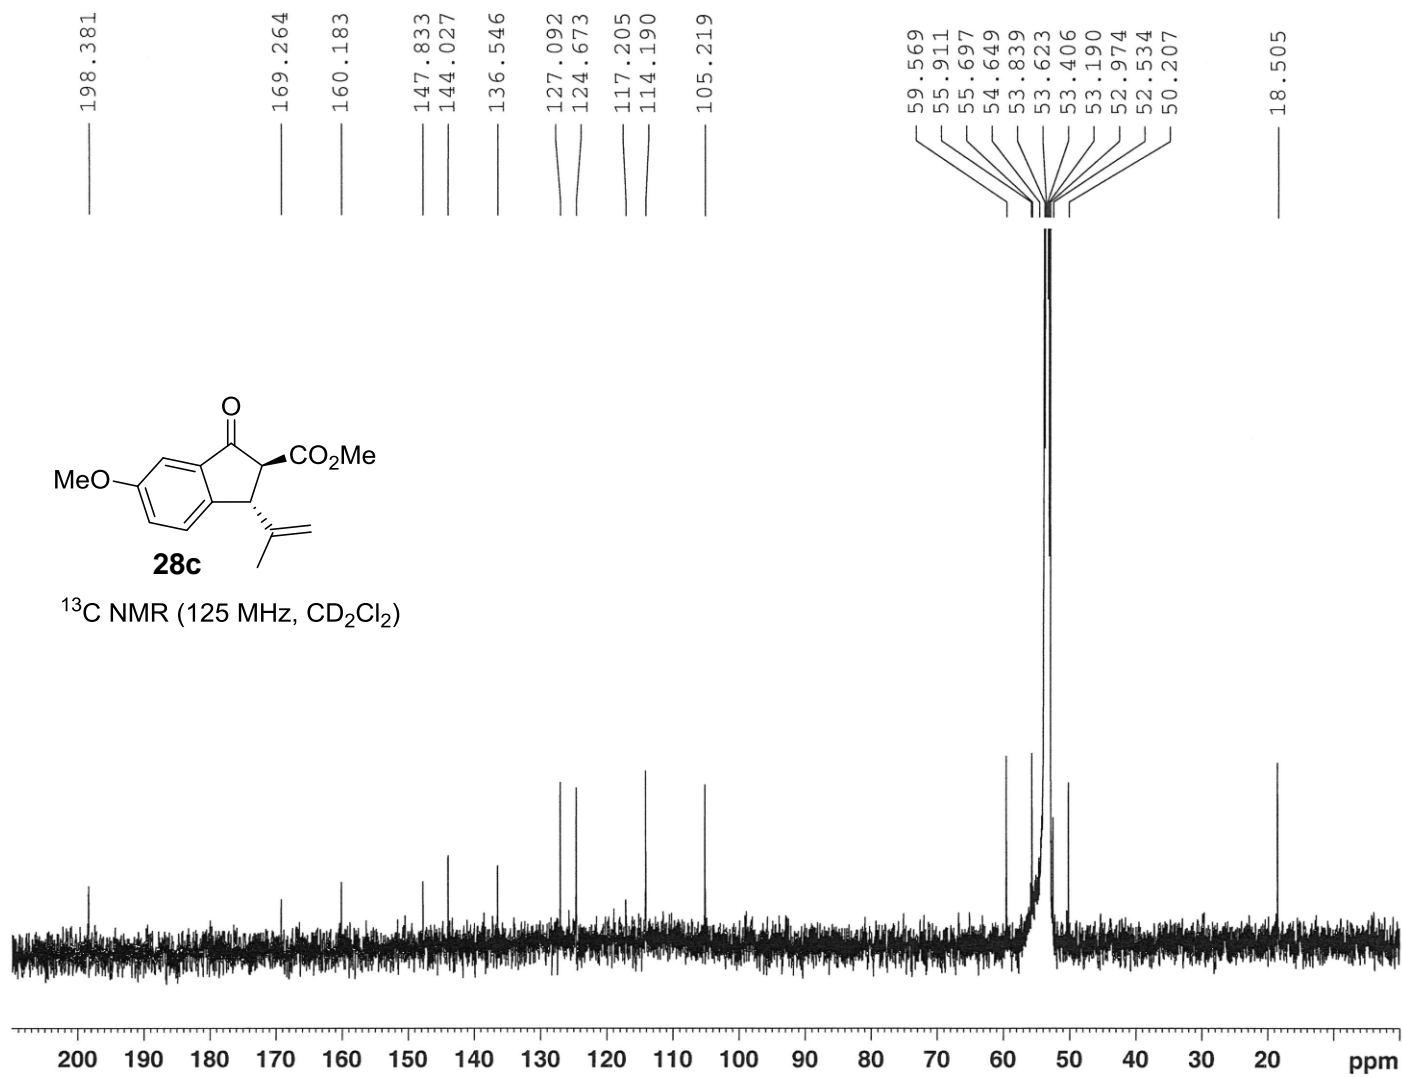

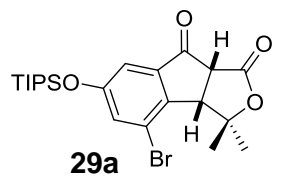

<sup>1</sup>H NMR (500 MHz, CDCl<sub>3</sub>)

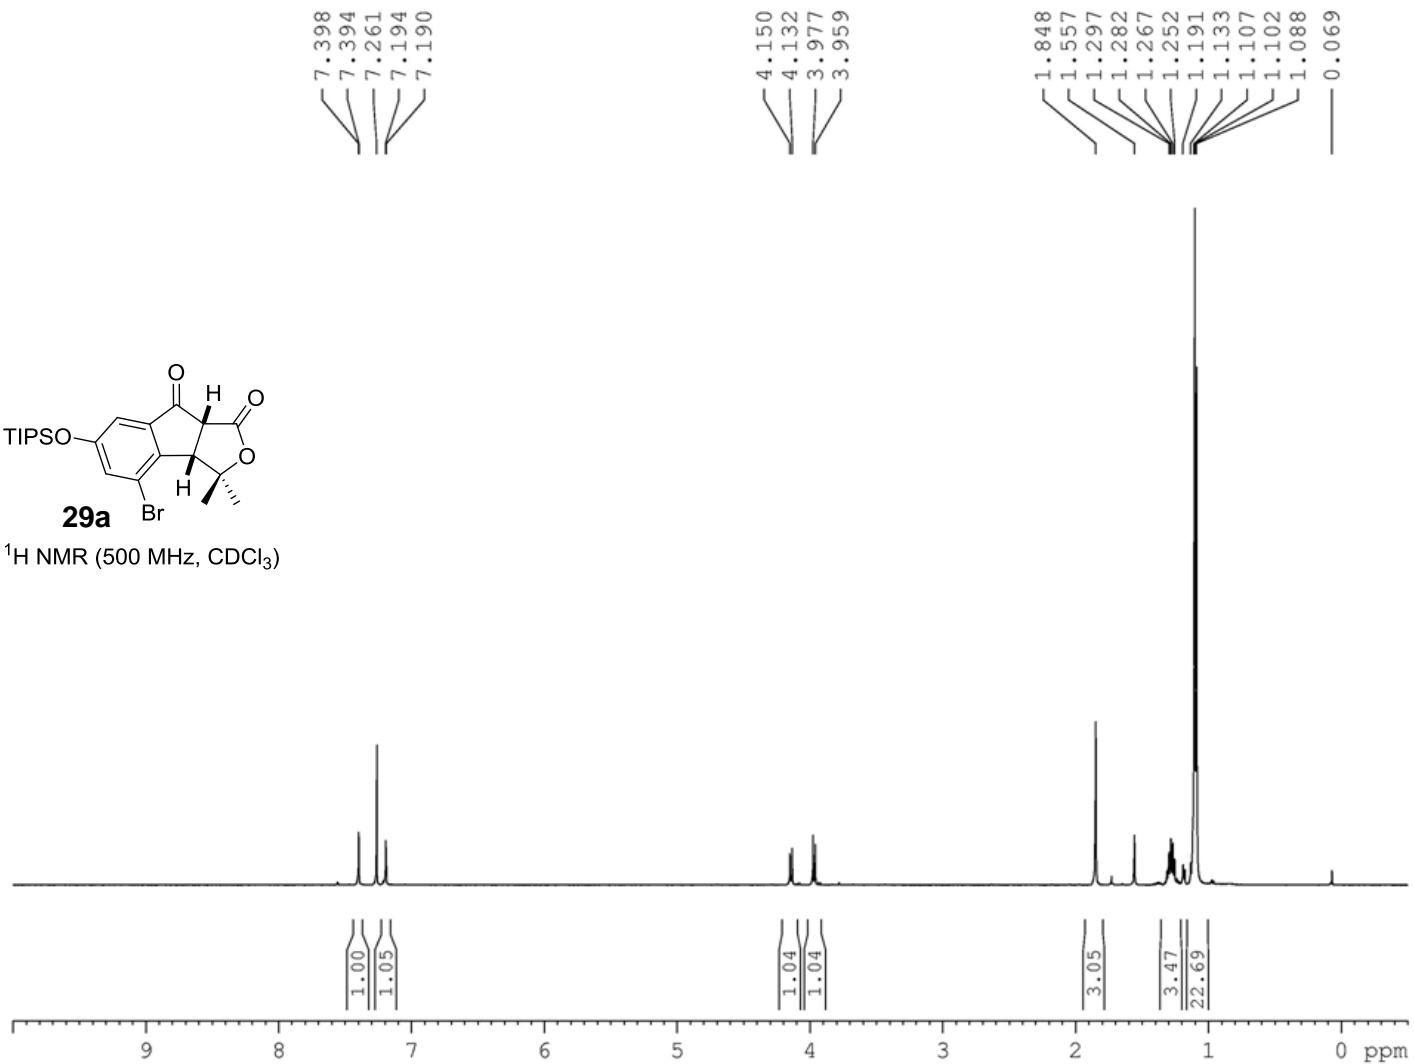

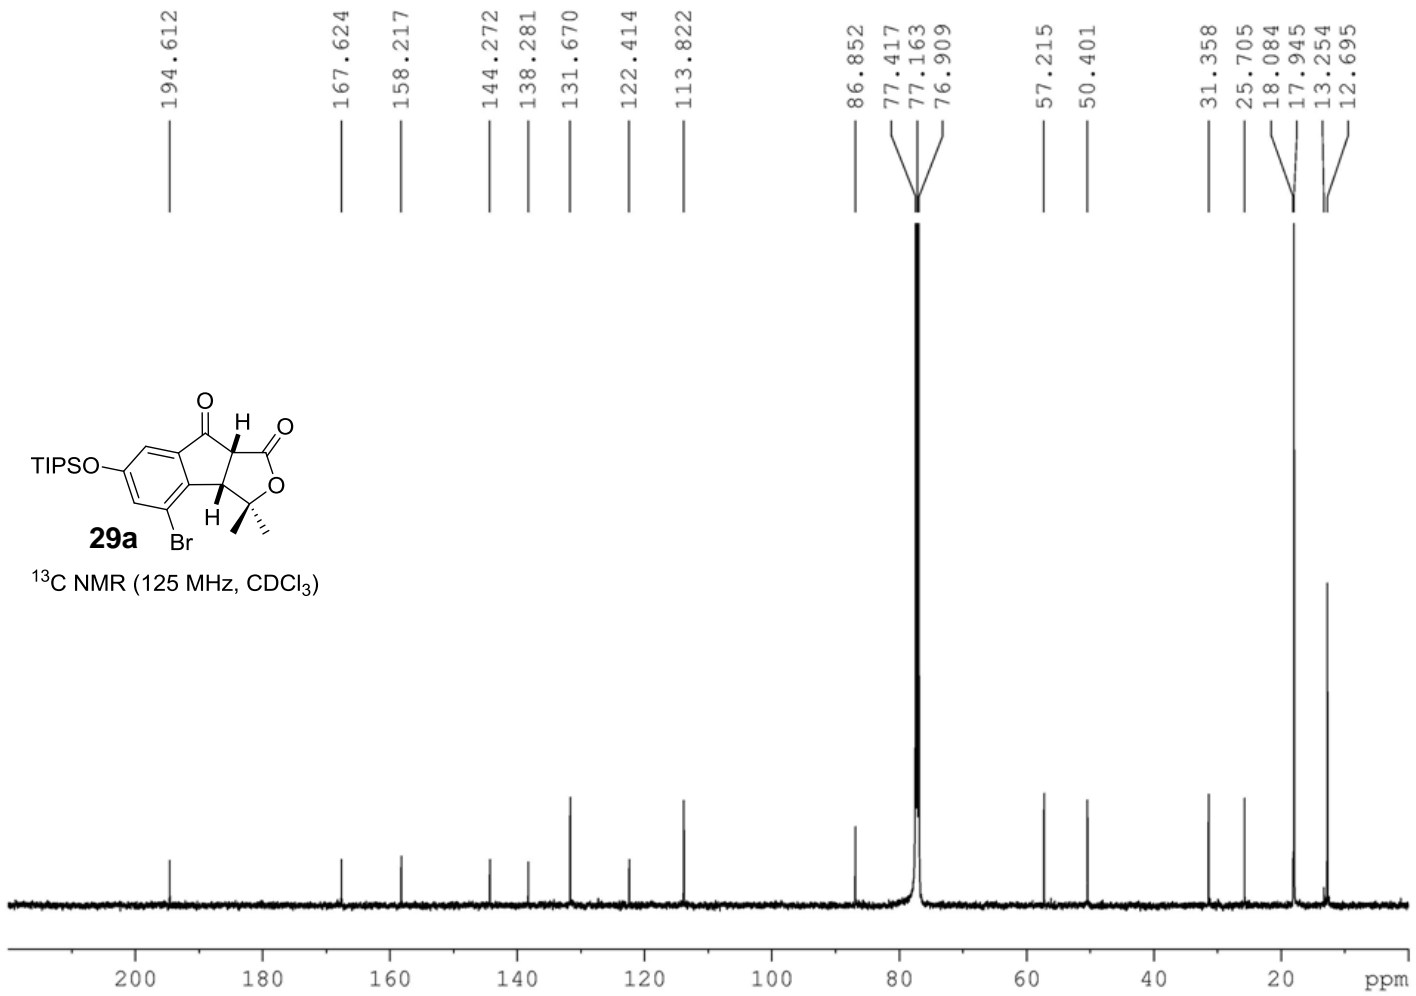

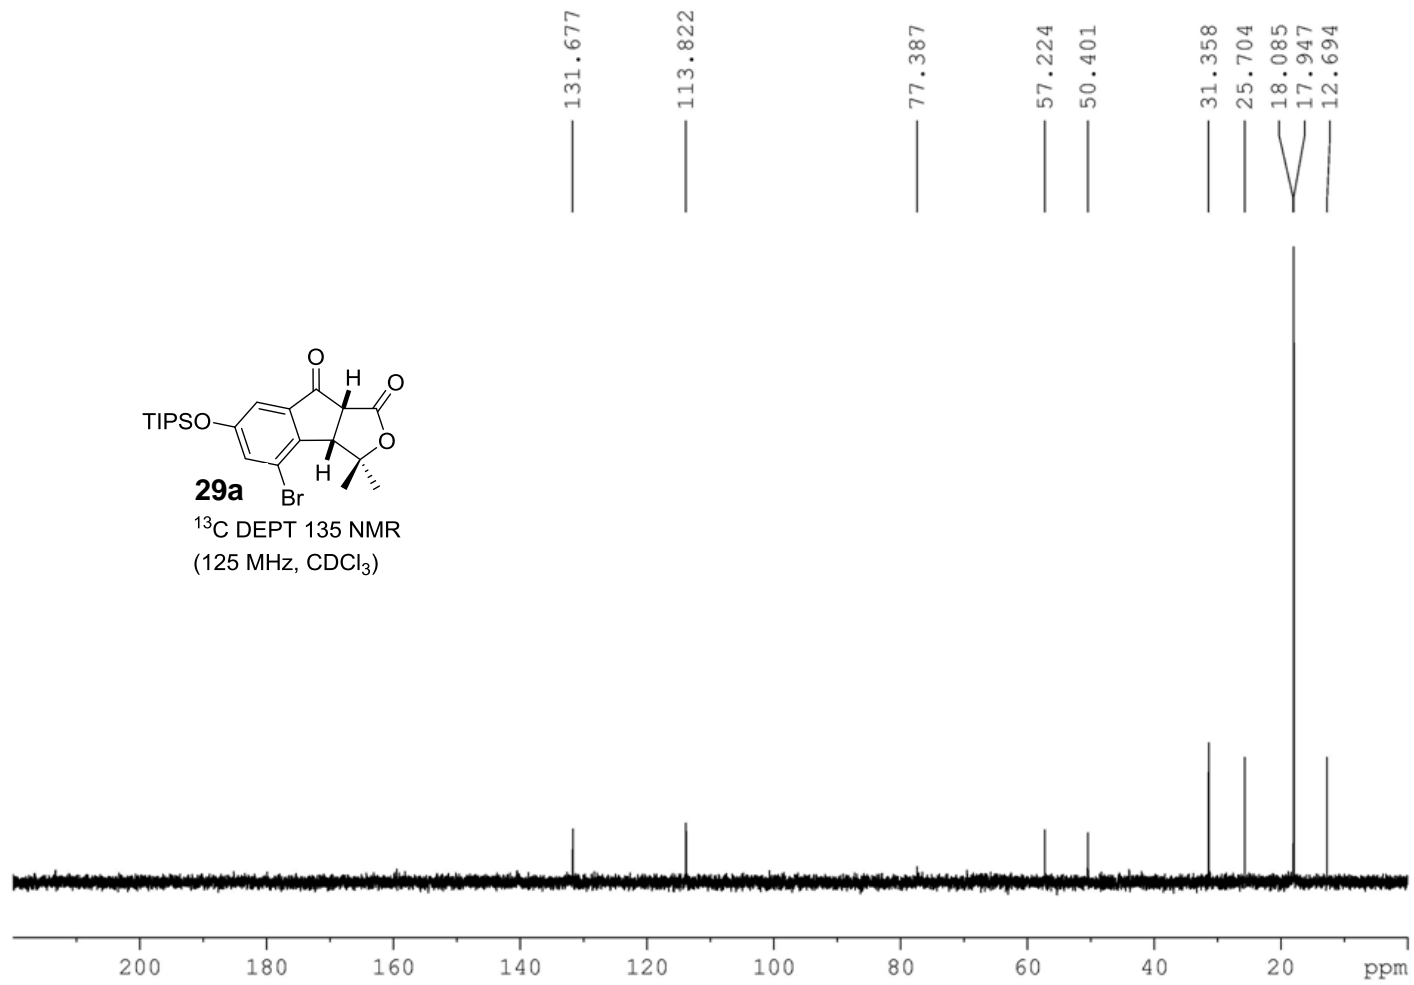

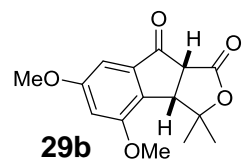

<sup>1</sup>H NMR (500 MHz, CDCl<sub>3</sub>)

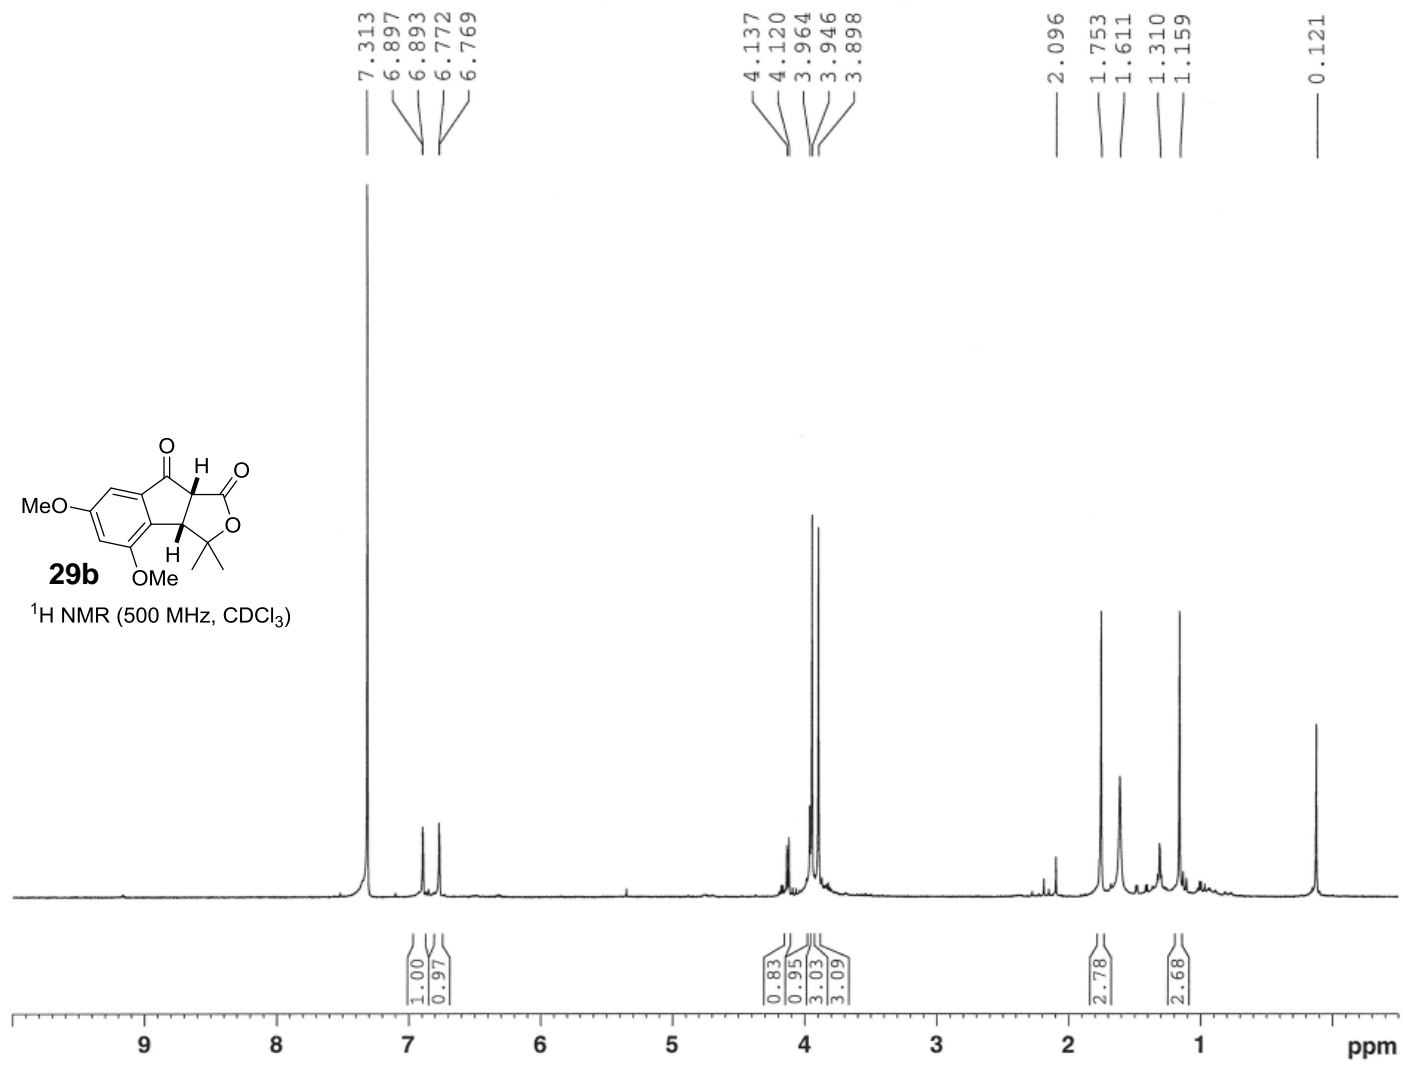

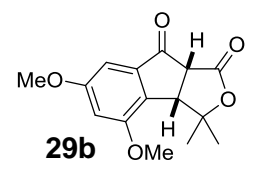

<sup>13</sup>C NMR (125 MHz, CDCl<sub>3</sub>)

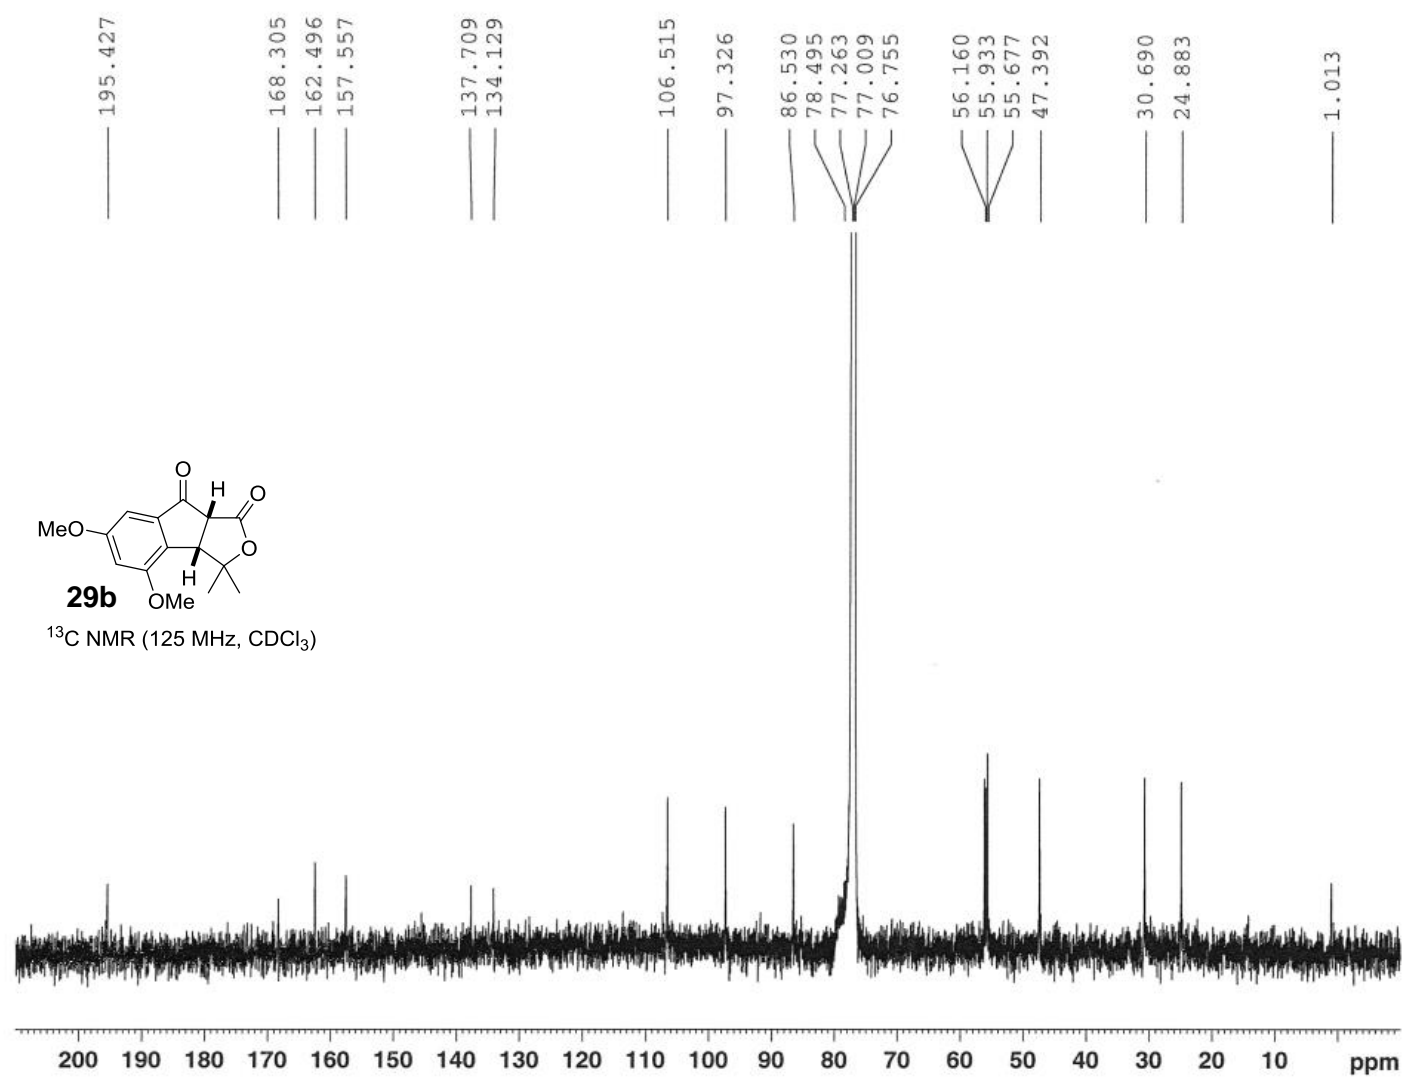

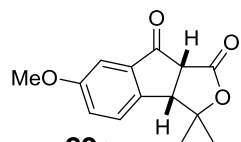

**29c**

<sup>1</sup>H NMR (500 MHz, CD<sub>2</sub>Cl<sub>2</sub>)

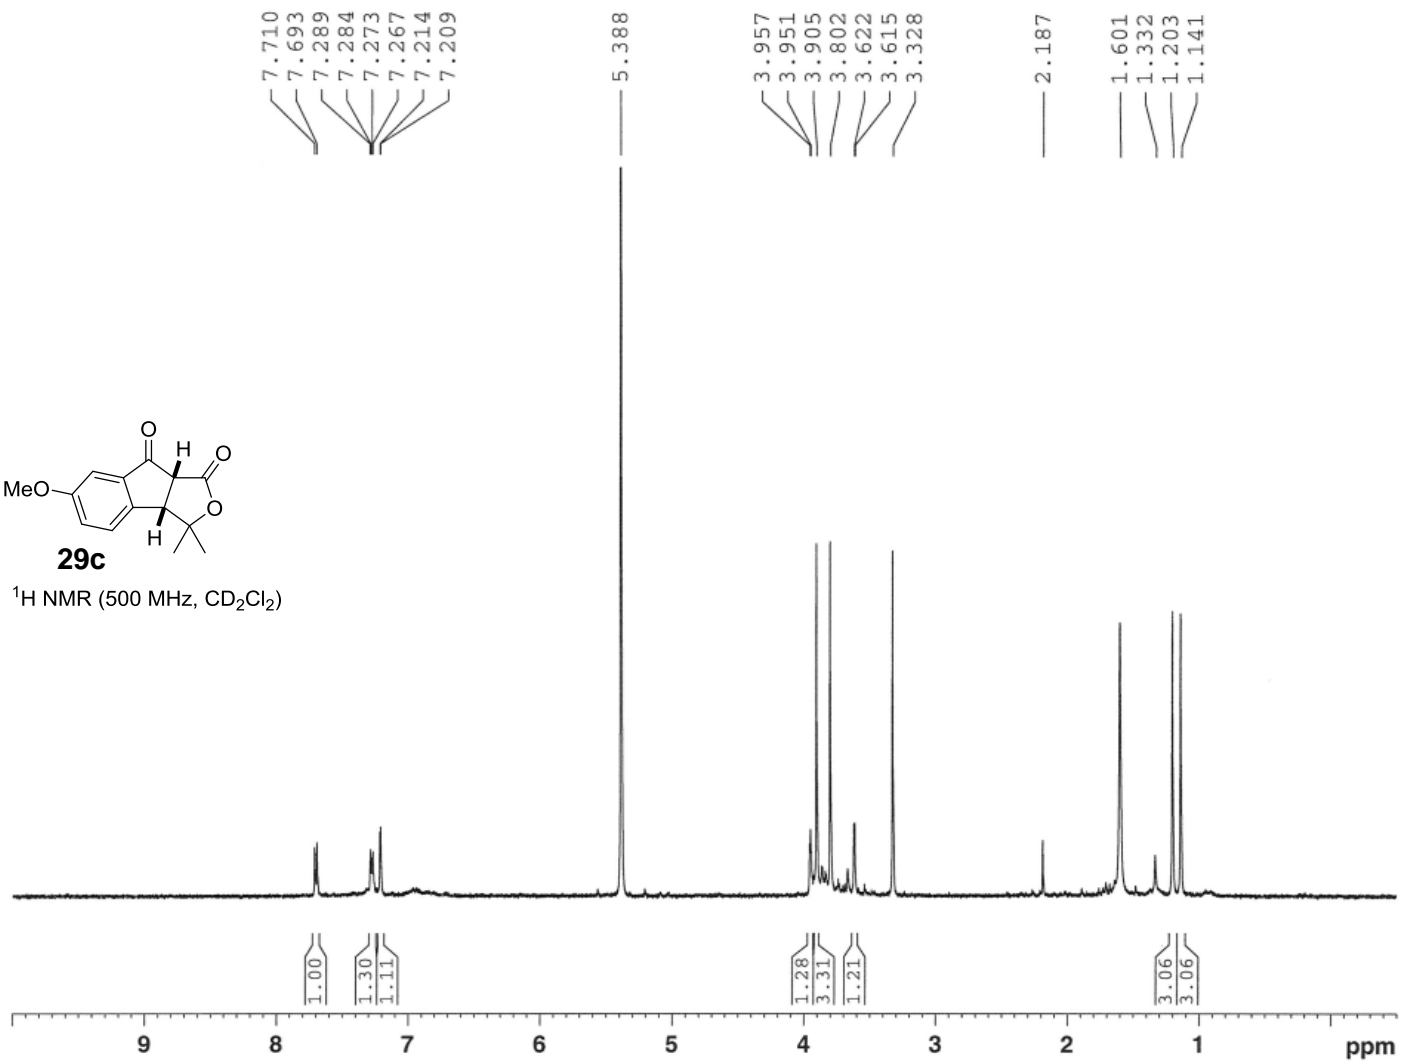

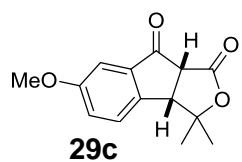

<sup>13</sup>C NMR (125 MHz, CD<sub>2</sub>Cl<sub>2</sub>)

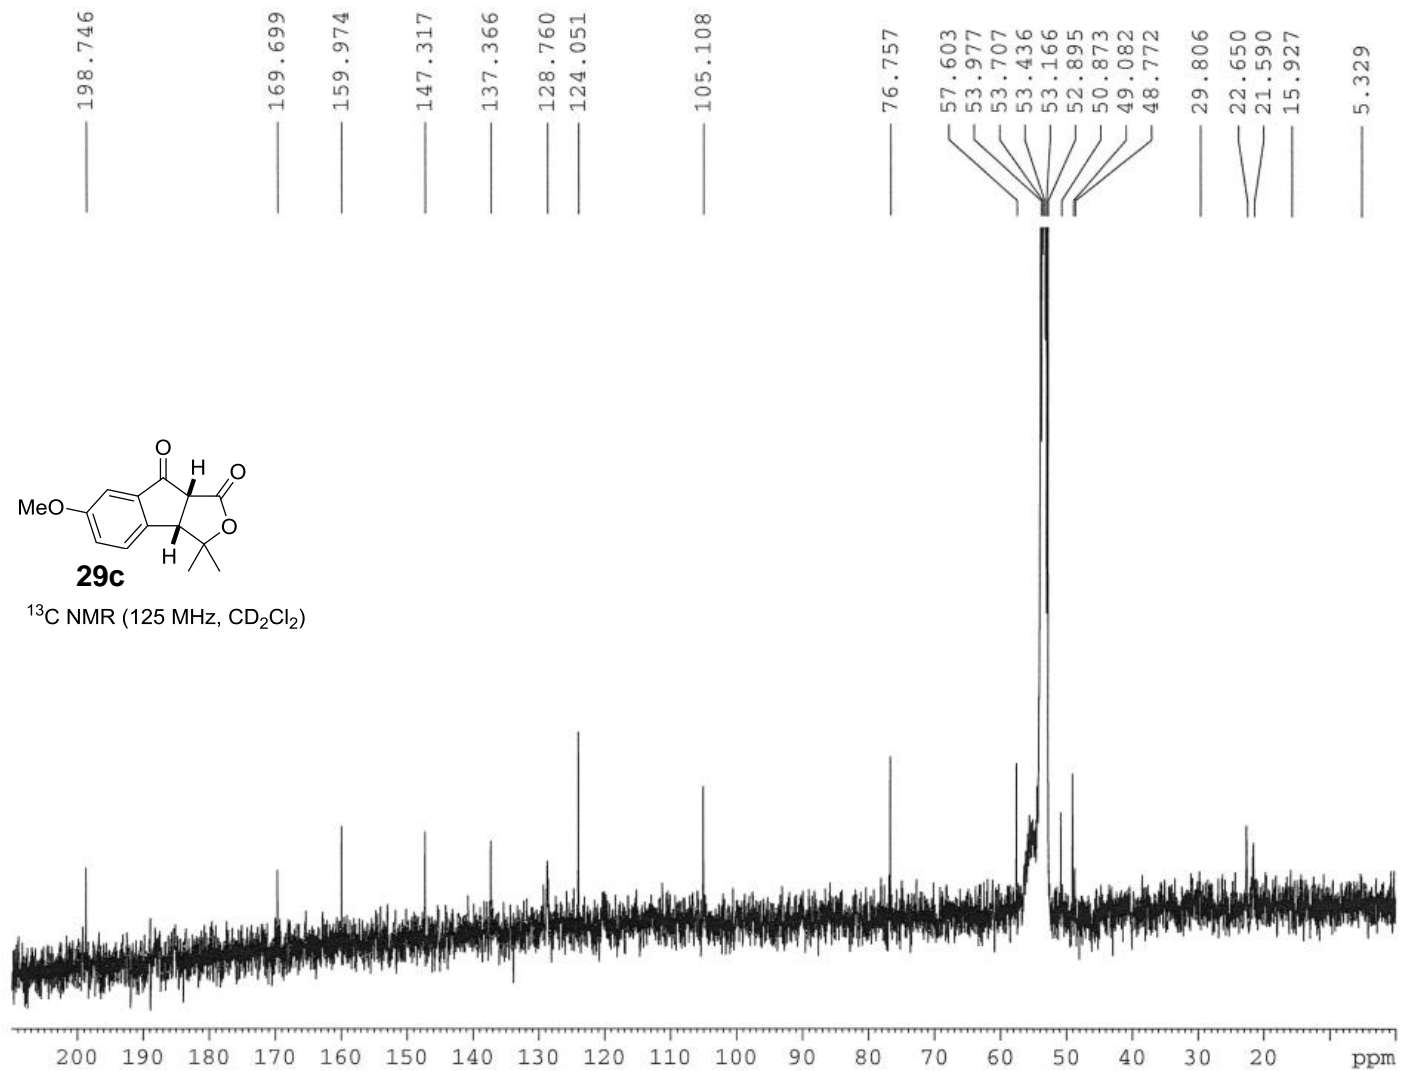

Supplement: ol403542k_si_002.pdf [file ol403542k_si_002.pdf]
